# Supplementary material for: Comparison of Prolonged Exposure vs Cognitive Processing Therapy for Treatment of Posttraumatic Stress Disorder Among US Veterans: A Randomized Clinical Trial
Source: PubMed Central journal article supplement (PMC8771295; doi:10.1001/jamanetworkopen.2021.36921), 2022-01-19

## Supplemental Online Content

Schnurr PP, Chard KM, Ruzek JI, et al. Comparison of prolonged exposure vs cognitive processing therapy for treatment of posttraumatic stress disorder among US veterans: a randomized clinical trial. *JAMA Netw Open*. 2022;5(1):e2136921.  
doi:10.1001/jamanetworkopen.2021.36921

**eTable.** Serious Adverse Events

**eFigure.** Posttraumatic Stress Disorder Symptom Severity on the CAPS-5 as a Function of Treatment Group

This supplemental material has been provided by the authors to give readers additional information about their work.

**eTable.** Serious Adverse Events

|                                       | Prolonged Exposure                | Cognitive Processing Therapy      |
|---------------------------------------|-----------------------------------|-----------------------------------|
|                                       | Patients with SAEs (Total Events) | Patients with SAEs (Total Events) |
| Total SAEs                            | 55 (78)                           | 63 (97)                           |
| Attributed                            | 1 (2)                             | 2 (2)                             |
| Possibly attributed                   | 3 (3)                             | 9 (9)                             |
| SAE type: Death                       | 1 (1)                             | 2 (2)                             |
| Attributed                            | 0 (0)                             | 0 (0)                             |
| Possibly attributed                   | 0 (0)                             | 0 (0)                             |
| SAE type: Psychiatric Hospitalization | 9 (13)                            | 23 (29)                           |
| Attributed                            | 0 (0)                             | 1 (1)                             |
| Possibly attributed                   | 1 (1)                             | 6 (6)                             |
| SAE type: Suicide Attempts            | 2 (5)                             | 3 (3)                             |
| Attributed                            | 0 (0)                             | 0 (0)                             |
| Possibly attributed                   | 0 (0)                             | 0 (0)                             |

Note. Adverse events were recorded from patient reports during treatment and assessment visits, and review of VA electronic medical records through 30 days post-6-month follow-up. Prolonged Exposure and Cognitive Processing Therapy did not differ in SAEs except more Cognitive Processing Therapy participants experienced psychiatric hospitalization,  $\chi^2 = 6.16$ ,  $p < .05$ .

**eFigure.** Posttraumatic Stress Disorder Symptom Severity on the CAPS-5 as a Function of Treatment Group

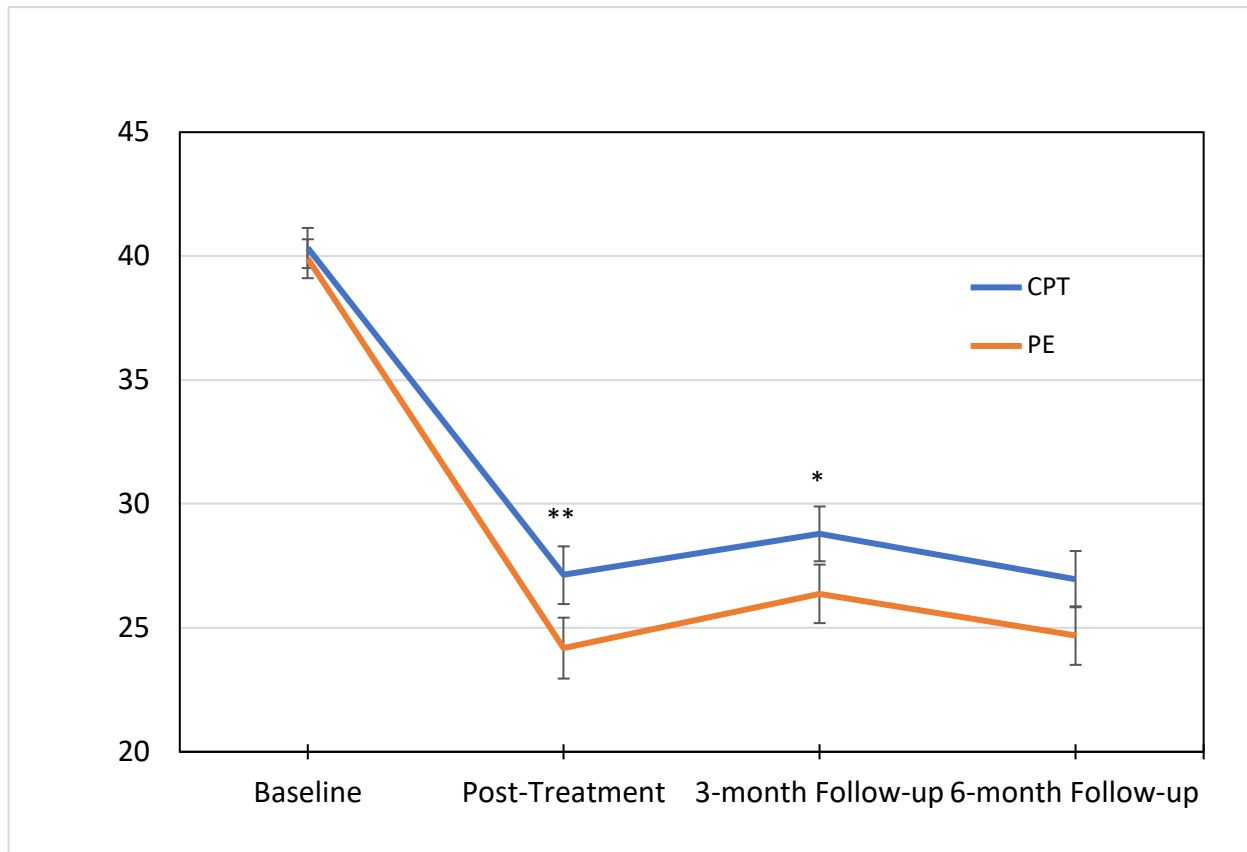

Supplement: jamanetwopen-e2136921-s002.pdf [file jamanetwopen-e2136921-s002.pdf]
