# Supplementary material for: Comparison of Prolonged Exposure vs Cognitive Processing Therapy for Treatment of Posttraumatic Stress Disorder Among US Veterans: A Randomized Clinical Trial
Source: PubMed Central journal article supplement (PMC8771295; doi:10.1001/jamanetworkopen.2021.36921), 2022-01-19
Supplement: jamanetwopen-e2136921-s001.pdf [file jamanetwopen-e2136921-s001.pdf]

35

36

37

38

39

40

41

42

43

44

45

46

47

48

This page intentionally left blank.

## TABLE OF CONTENTS

|    |             |                                                                                      |                    |
|----|-------------|--------------------------------------------------------------------------------------|--------------------|
| 50 | <b>I.</b>   | <b>BACKGROUND AND SIGNIFICANCE .....</b>                                             | <b>1</b>           |
| 51 | A.          | Introduction .....                                                                   | 1                  |
| 52 | B.          | Treatment of PTSD .....                                                              | 1                  |
| 53 | C.          | Comparative Effectiveness of Prolonged Exposure and Cognitive Processing Therap..... | 4                  |
| 54 | D.          | Importance of the Proposed Research to VA.....                                       | 8                  |
| 55 | E.          | Feasibility of a Cooperative Study within the VA.....                                | 10                 |
| 56 | F.          | Summary.....                                                                         | 14                 |
| 57 | <b>II.</b>  | <b>SPECIFIC OBJECTIVES.....</b>                                                      | <b>16</b>          |
| 58 | A.          | Primary Objective.....                                                               | 16                 |
| 59 | B.          | Secondary Objective .....                                                            | 16                 |
| 60 | C.          | Tertiary Objective .....                                                             | 16                 |
| 61 | D.          | Exploratory Analyses .....                                                           | 16                 |
| 62 | <b>III.</b> | <b>SUMMARY OF STUDY DESIGN.....</b>                                                  | <b>17</b>          |
| 63 | A.          | Study Population .....                                                               | 17                 |
| 64 | B.          | Study Treatments.....                                                                | 18                 |
| 65 | C.          | Outcome Measures.....                                                                | 18                 |
| 66 | D.          | Sample Size .....                                                                    | 18                 |
| 67 | E.          | Study Monitoring .....                                                               | 18                 |
| 68 | <b>IV.</b>  | <b>PATIENT POPULATION AND PATIENT RECRUITMENT.....</b>                               | <b>19</b>          |
| 69 | A.          | Inclusion and Exclusion Criteria .....                                               | 19                 |
| 70 | B.          | Recruitment.....                                                                     | 19                 |
| 71 | C.          | Screening and Consent.....                                                           | <u>2324</u>        |
| 72 | <b>V.</b>   | <b>TREATMENT .....</b>                                                               | <b><u>2624</u></b> |
| 73 | A.          | Prolonged Exposure.....                                                              | <u>2624</u>        |
| 74 | B.          | Cognitive Processing Therapy .....                                                   | <u>2926</u>        |
| 75 | <b>VI.</b>  | <b>TREATMENT ASSIGNMENT .....</b>                                                    | <b><u>3129</u></b> |
| 76 | A.          | Randomization .....                                                                  | <u>3129</u>        |
| 77 | B.          | Blinding .....                                                                       | <u>3229</u>        |
| 78 | <b>VII.</b> | <b>MEASURES.....</b>                                                                 | <b><u>3334</u></b> |
| 79 | A.          | Screening and Eligibility .....                                                      | <u>3334</u>        |
| 80 | B.          | Primary Outcome .....                                                                | <u>3533</u>        |
| 81 | C.          | Secondary Outcomes.....                                                              | <u>3533</u>        |

|     |                                                                                          |                    |
|-----|------------------------------------------------------------------------------------------|--------------------|
| 82  | <b>VIII. STUDY PROCEDURES.....</b>                                                       | <b><u>3835</u></b> |
| 83  | A. Assessment.....                                                                       | <u>3835</u>        |
| 84  | B. Treatment.....                                                                        | <u>4340</u>        |
| 85  | C. Discontinuation of Study Treatment.....                                               | <u>4946</u>        |
| 86  | D. Withdrawals.....                                                                      | <u>5047</u>        |
| 87  | E. Post Follow-up Procedures.....                                                        | <u>5047</u>        |
| 88  | F. Training and Supervision.....                                                         | <u>5047</u>        |
| 89  | G. Therapy Fidelity Monitoring.....                                                      | <u>5148</u>        |
| 90  | <b>IX. DATA COLLECTION AND MANAGEMENT.....</b>                                           | <b><u>5148</u></b> |
| 91  | A. Data Management.....                                                                  | <u>5249</u>        |
| 92  | B. Data Security.....                                                                    | <u>5350</u>        |
| 93  | C. Proposed Data Collection Forms.....                                                   | <u>5451</u>        |
| 94  | <b>X. BIostatistical Considerations.....</b>                                             | <b><u>5552</u></b> |
| 95  | A. Expected Treatment Effect.....                                                        | <u>5552</u>        |
| 96  | B. Sample Size and Power Considerations.....                                             | <u>5653</u>        |
| 97  | C. Number of Participating Sites and Duration of Study.....                              | <u>5956</u>        |
| 98  | D. Final Statistical Analysis.....                                                       | <u>6057</u>        |
| 99  | E. Interim Analysis.....                                                                 | <u>6360</u>        |
| 100 | F. Procedure for Handling Missing Data.....                                              | <u>6564</u>        |
| 101 | G. Procedures for Reporting Modifications to the Original Statistical Plan.....          | <u>6562</u>        |
| 102 | <b>XI. MONITORING AND REPORTING ADVERSE EVENTS.....</b>                                  | <b><u>6663</u></b> |
| 103 | A. Importance of Adverse Event Reporting.....                                            | <u>6663</u>        |
| 104 | B. Role of the Local Site Investigator in Adverse Event Monitoring.....                  | <u>6663</u>        |
| 105 | C. Collection of Safety Information.....                                                 | <u>6663</u>        |
| 106 | D. Expedited Reporting of Serious Adverse Events.....                                    | <u>7067</u>        |
| 107 | E. Reporting Adverse Events and Serious Adverse Events to the VA Central IRB.....        | <u>7067</u>        |
| 108 | <b>XII. QUALITY CONTROL.....</b>                                                         | <b><u>7168</u></b> |
| 109 | A. Standardization/Validation of Measurements.....                                       | <u>7168</u>        |
| 110 | B. Treatment.....                                                                        | <u>7168</u>        |
| 111 | C. Masking.....                                                                          | <u>7168</u>        |
| 112 | D. Monitoring Participant Intake and Probation/Termination of Participating Centers..... | <u>7168</u>        |
| 113 | <b>XIII. ORGANIZATION &amp; ADMINISTRATION.....</b>                                      | <b><u>7269</u></b> |
| 114 | <b>XIV. GOOD CLINICAL PRACTICE (GCP).....</b>                                            | <b><u>7673</u></b> |
| 115 | A. Role of GCP.....                                                                      | <u>7673</u>        |

|     |                                                   |                    |
|-----|---------------------------------------------------|--------------------|
| 116 | B. Summary of Monitoring and Auditing Plans ..... | <u>7673</u>        |
| 117 | <b>XV. PUBLICATIONS .....</b>                     | <b><u>7774</u></b> |
| 118 | A. Publication Plan .....                         | <u>7774</u>        |
| 119 | B. Planned publications .....                     | <u>7875</u>        |
| 120 | <b>XVI. REFERENCES.....</b>                       | <b><u>8077</u></b> |

121

122 **APPENDICES**

123 **Appendix A. CSP 591 INFORMED CONSENT FORM MODEL**

124 **Appendix B. BIostatistical AND RESEARCH DATA PROCESSING (BRDP)**

125 **Appendix C. RESEARCH DATA FORMS**

126 **Appendix D. OWNERSHIP, CONTROL AND ACCESS TO STUDY DATA**

127 **Appendix E. UPDATES TO THE PROTOCOL**

128

129

130

131

132

133

134

135

136

137

138

139

140

141

142

143

144

145

This page intentionally left blank.

146 **I. BACKGROUND AND SIGNIFICANCE**

147 **A. Introduction**

148 Posttraumatic stress disorder (PTSD) is a serious mental health problem in Veteran and non-  
149 Veteran populations. PTSD can develop following exposure to a traumatic event such as  
150 combat, assault, disaster, and accidents (American Psychiatric Association, 1994). Lifetime  
151 prevalence in US adults is higher in women (11.7%) than in men (4.0%) (Kessler et al., 2012)  
152 and is especially high among military Veterans (Kulka et al., 1990; Ramchand et al., 2010).  
153 According to a report by the RAND Corporation (Tanelian & Jaycox, 2008), the prevalence of  
154 PTSD is 14% in military personnel who served in Operations Enduring Freedom, Iraqi Freedom,  
155 or New Dawn (OEF/OIF/OND).

156 The symptoms of PTSD include re-experiencing the traumatic event, avoidance of stimuli  
157 associated with the event or numbing of general responsiveness, and increased arousal, with  
158 the increased arousal manifested by such symptoms as sleep disturbance, irritability or anger  
159 outbursts, and an exaggerated startle response. However, PTSD has much broader effects on  
160 the lives of individuals who develop it. PTSD is associated with a range of comorbid conditions  
161 and functional difficulties, including depression, substance abuse, anxiety disorders,  
162 psychosocial impairment, poor physical health, and greater service utilization (e.g., Kessler et  
163 al., 2005; Kulka et al., 1990; Schnurr et al., 2009). Without adequate treatment, PTSD can  
164 become chronic (Kessler et al., 1995), lasting even into old age (Kessler et al., 2012; Pietrzak et  
165 al., 2011; Schnurr et al., 2002). Unfortunately, individuals with PTSD are less likely than those  
166 with other common psychiatric disorders to seek treatment. The National Comorbidity Survey  
167 Replication (Wang et al., 2005) estimated that the cumulative lifetime probability of treatment  
168 contact was only 65.3% for PTSD, versus 88.1% for major depression and 95.3% for panic  
169 disorder. Time to initial contact was also substantially longer in PTSD than in these other  
170 disorders.

171 **B. Treatment of PTSD**

172 *1. Treatment effectiveness*

173 Practice guidelines for PTSD recommend Cognitive Behavioral Therapy (CBT), Eye Movement  
174 Desensitization and Reprocessing (EMDR), selective serotonin reuptake inhibitors (SSRIs), and  
175 the serotonin norepinephrine reuptake inhibitor (SNRI) venlafaxine as primary treatments  
176 (American Psychiatric Association Work Group on ASD and PTSD, 2004; Departments of

177 Veterans Affairs and Defense, 2010; Foa et al., 2008). CBT is a type of psychotherapy that  
178 uses systematic techniques based on learning theory and cognitive psychology to help patients  
179 identify and correct dysfunctional thoughts, behaviors, and emotions. Two of the most well-  
180 studied types of CBT for treating PTSD are being disseminated nationally across VA (Karlin et  
181 al., 2010): a type of exposure therapy known as Prolonged Exposure (PE; Foa et al., 2007) and  
182 a type of cognitive therapy known as Cognitive Processing Therapy (CPT; Resick et al., 2010)..

183 The evidence demonstrating the effectiveness of PE and CPT is particularly strong. A report by  
184 the Institute of Medicine (IOM; 2008) found that only CBT with an exposure component had  
185 sufficient evidence of effectiveness. However, both PE and CPT were classified in that report  
186 as exposure therapies, although CPT is predominantly a cognitive therapy. A more recent  
187 report by the Agency for Healthcare Research and Quality (AHRQ; 2012) that categorized PE  
188 and CPT separately found that evidence of effectiveness for exposure therapies (including PE)  
189 was strong for reducing PTSD and depression symptoms and moderate for achieving loss of  
190 PTSD diagnosis. The AHRQ report found the evidence was moderate for cognitive therapies  
191 (like CPT) and for mixed types of CBT. No other types of psychotherapy were judged to have  
192 moderate or better evidence for all three outcomes.

193 In contrast, the IOM (2008) found that the evidence for the effectiveness of medication was  
194 inconclusive, mostly due to the potential for bias introduced by extensive use in the available  
195 studies of the last-observation-carried-forward method of handling missing data. The AHRQ  
196 report found moderate evidence of effectiveness for the SSRI paroxetine and the SNRI  
197 venlafaxine for treating PTSD severity, depression severity, and loss of PTSD diagnosis.

## 198 2. *The need for comparative effectiveness research on treatments for PTSD*

199 A report by the IOM in 2009 set out a national agenda for comparative effectiveness research  
200 (CER), in response to a Congressional allocation of over \$1 billion to facilitate optimal decisions  
201 about healthcare. There have been very few comparative effectiveness studies of treatments  
202 for PTSD, and none have been sufficiently large to have adequate power to compare active  
203 treatments. Consequently, the recent AHRQ report (2012) on PTSD treatment calls for studies  
204 that compare psychological treatments with the best evidence of efficacy, following a similar  
205 recommendation by the IOM (Institute of Medicine, 2008). The IOM report specifically  
206 mentioned the need for more research on the treatment of PTSD in military Veterans.  
207 Comparing PE to CPT would directly respond to these recommendations.



208 **Table I.1** presents information from the AHRQ report (2012) on between-group differences in  
 209 reduction of PTSD symptom severity for all psychotherapies and medications that had moderate  
 210 or high evidence of effectiveness across all outcomes examined. The data are presented as the  
 211 difference in pre-post change between active treatment and control on the Clinician-  
 212 Administered PTSD Scale (CAPS; Weathers et al., 2001), the gold standard for PTSD  
 213 assessment.

214 **Table I.1. AHRQ findings for Treatments with Moderate or High Evidence Across Outcomes**

| Treatment                                     | Strength of Evidence | Pre-post Difference in PTSD Severity vs. Controls (95% CI) |
|-----------------------------------------------|----------------------|------------------------------------------------------------|
| CBT–Cognitive Processing Therapy <sup>a</sup> | Moderate             | -35.9 (-52.8 to -19.0)                                     |
| CBT–Exposure <sup>b</sup>                     | High                 | -24.4 (-37.2 to -11.5)                                     |
| CBT–Mixed                                     | Moderate             | -27.6 (-40.0 to -15.3)                                     |
| Venlafaxine                                   | Moderate             | -7.2 (-11.0 to -3.3)                                       |
| Paroxetine                                    | Moderate             | -12.6 (-15.7 to -9.5)                                      |

215 *Note.* PTSD severity was measured on the Clinician-Administered PTSD Scale (Weathers et al., 2001). A difference  
 216 of 10 points is considered to be the minimum indicating treatment response (Schnurr et al., 2001). <sup>a</sup>All 3 studies in  
 217 the CBT-Cognitive Restructuring category for this outcome were Cognitive Processing Therapy (Chard et al., 2005;  
 218 Monson et al., 2006; Resick et al., 2002). <sup>b</sup>Four of the 5 studies in the CBT-Exposure category for this outcome were  
 219 Prolonged Exposure (Asukai et al., 2010; Resick et al., 2002; Rothbaum et al., 2005; Schnurr et al., 2007).

220 These data illustrate a consistent finding across other reviews: that psychotherapy is more  
 221 effective than medication. It is difficult to directly compare the effectiveness of psychotherapy  
 222 and medication because of differences in study design, particularly the type of control group.  
 223 Whereas placebos are used in medication trials, psychotherapy studies use less active controls  
 224 (waitlist) and more active controls (nonspecific treatment, treatment-as-usual) (Schnurr, 2007).  
 225 However, it is unlikely that methodological factors completely account for the difference between  
 226 the psychotherapy and medication findings.

### 227 3. Patient preferences

228 Studies of patient preferences have found that patients prefer psychotherapy over medication  
 229 for the treatment of PTSD. In a study that used equipoise-stratified randomization, Shalev et al.  
 230 (2012) found that 43% declined to be randomized to medication, whereas only 3.3% declined  
 231 cognitive therapy (63% of whom also declined medication) and 1.2% declined PE (67% of  
 232 whom also declined medication). A recent randomized clinical trial of sertraline versus PE  
 233 (Feeney et al., 2010) found that 61% of study participants preferred PE. In addition,  
 234 discrepancy between a patient’s preference and assigned group predicted lower response to  
 235 both treatments. An ongoing study in the Netherlands found that only 4% of participants wanted  
 236 medication, preferring PE (50%) or EMDR (46%) instead (van Minnen, 2012).

237 **C. Comparative Effectiveness of Prolonged Exposure and Cognitive Processing**  
238 **Therapy**

239 1. *Direct and indirect comparisons*

240 In contrast to the amount of evidence indicating the effectiveness of PE and CPT, there is  
241 almost no direct evidence about their effectiveness relative to one another. The only study to  
242 compare the treatments was a single-site trial in civilian female rape survivors (Resick et al.,  
243 2002). Both PE and CPT were highly effective but the effect size of the difference between  
244 them was neither clinically nor statistically significant ( $d = 0.14$  favoring CPT). Follow-up of the  
245 sample an average of 6 years later found an effect size  $< .01$  (Resick et al., 2012). However,  
246 with 62 participants per group, the study was not powered to detect an effect smaller than  
247 medium ( $d = .50$ ; Cohen, 1988), which is unlikely for two highly effective treatments. Thus, the  
248 lack of difference between treatments is inconclusive.

249 Other findings suggesting that CPT is more effective than PE are similarly inconclusive. A  
250 meta-analysis currently under review (Watts et al., 2012) found that the standardized mean  
251 difference (vs. control) was nonsignificantly larger for CPT ( $d = 1.69$ , 95% CI = 1.27, 2.11) than  
252 for PE ( $d = 1.38$ , 95% CI = 0.90, 1.86). According to the AHRQ report (2012; **Table I.1**), which  
253 was based on fewer studies because the authors eliminated studies judged to have a high risk  
254 of bias, the decrease in PTSD severity scores on the CAPS between intervention and control  
255 was larger in CPT than in PE: -35.9 (-52.81, -18.97) in CPT versus -24.4 (-37.2, -11.5) in PE.  
256 However, confidence intervals for PE and CPT were overlapping in both studies. Also, the  
257 estimate for exposure in the AHRQ report did not include data from two trials that had found a  
258 substantial effect of exposure versus waitlist because these trials did not use the CAPS (Foa et  
259 al., 1999, 2005). In addition, the difference may be explained by the fact that all of the CPT  
260 studies included in both reviews used an untreated control group, which results in larger effects.  
261 In contrast, some of the PE studies used a treated control group; CSP #494 (Schnurr et al.,  
262 2007), which introduced significant heterogeneity in the AHRQ analysis, had a distinctively  
263 active comparison group.

264 Evaluation data from VA's rollouts (**Table I.2**) showing a larger effect size for CPT than for PE  
265 are difficult to interpret as well because key decisions about factors that could affect outcome  
266 (such as the criterion for determining treatment completion) are not standardized across  
267 treatments. Nevertheless, these data demonstrate that both treatments are effective in VA  
268 patients.

269 **Table I.2. Pre-post Change in PTSD Severity on the PTSD Checklist in VA's National Rollouts**

|                              | N     | Pre Mean<br>(SD) | Post Mean<br>(SD) | Decrease | Standardized Pre-Post<br>Mean Difference (d) |
|------------------------------|-------|------------------|-------------------|----------|----------------------------------------------|
| Prolonged Exposure           | 1,354 | 63.0 (11.9)      | 44.9 (16.8)       | 18.1     | 1.21                                         |
| Cognitive Processing Therapy | 689   | 64.8 (10.6)      | 44.5 (14.2)       | 20.3     | 1.57                                         |

270 *Note.* PTSD severity was measured on the PTSD Checklist (PCL, Weathers et al., 1993). Using a CAPS difference  
 271 of 10 points as a benchmark (Schnurr et al., 2001), a difference of 8 points would be considered to be the minimum  
 272 indicating treatment response based on a regression of the PCL on CAPS scores (Monson et al., 2008).

273 In summary, the data comparing PE and CPT are inconclusive. There has been only one direct  
 274 comparison. It was not sufficiently powered and the study population was exclusively female  
 275 non-Veteran rape survivors. Findings from recent quantitative reviews suggest that CPT has a  
 276 somewhat larger effect on PTSD severity scores, but methodological factors may explain the  
 277 difference. Methodological factors also may account for the larger effect size observed for CPT  
 278 than for PE in the VA rollouts. CSP #591 would resolve the ambiguity about the comparative  
 279 effectiveness of PE and CPT by providing a definitive test between the treatments.

280 *2. Provider beliefs about PE and CPT*

281 Data from an ongoing study by Cook (including Co-Proponents Schnurr and Ruzek) suggest  
 282 that VA clinicians prefer CPT over PE and believe it to be more effective than PE, even though  
 283 there is no evidence to substantiate this belief. In the study, 201 providers from 38 VA  
 284 residential PTSD treatment programs participated in a web-based survey about implementation  
 285 of PE and CPT (Cook et al., 2012). Questions were derived from Greenhalgh et al.'s (2005)  
 286 model of implementation that was based on Roger's (2003) classic model.

287 **Table I.3. Innovation Characteristics and Construct Ratings for PE and CPT in VA Clinicians**

|                                 | PE<br><i>M (SD)</i> | CPT<br><i>M (SD)</i> |
|---------------------------------|---------------------|----------------------|
| Relative advantage*             | 6.02 (1.40)         | 6.65 (1.67)          |
| Compatibility*                  | 7.11 (1.61)         | 7.65 (1.62)          |
| Complexity                      | 7.33 (1.49)         | 7.24 (1.77)          |
| Trialability*                   | 6.21 (1.47)         | 7.26 (1.39)          |
| Observability                   | 7.39 (1.34)         | 7.54 (1.35)          |
| Potential for reinvention*      | 7.08 (1.56)         | 8.00 (1.46)          |
| Risk*                           | 5.95 (2.76)         | 5.19 (1.76)          |
| Task issues*                    | 6.87 (1.94)         | 7.31 (1.63)          |
| Nature of knowledge             | 7.95 (1.41)         | 8.01 (1.37)          |
| Augmentation-technical support* | 7.63 (1.42)         | 7.91 (1.55)          |
| Skills*                         | 2.66 (2.02)         | 3.08 (1.61)          |
| Dedicated time and resources*   | 6.60 (1.68)         | 7.57 (1.71)          |
| Incentives and mandates*        | 6.53 (2.28)         | 7.53 (2.06)          |

288 \*p < .05

289 The data reported in **Table I.3** show that CPT was rated more positively than PE on a range of  
290 innovation characteristics, including *relative advantage*, *compatibility*, *trialability*, *potential for*  
291 *reinvention*, *task issues*, and *augmentation-technical support*, and lower than PE on *perceived*  
292 *risk*). Consistent with the pattern noted for innovation characteristics, participants reported  
293 significantly higher skill with CPT than with PE, and both more *dedicated time and resources*  
294 and *incentives and mandates* for CPT than for PE.

295 Other findings suggest that some clinicians incorrectly believe that exposure therapies like PE  
296 are difficult for patients to tolerate and that these treatments can lead to symptom worsening  
297 and increased dropout, despite evidence to the contrary (Feeny et al., 2003; van Minnen et al.,  
298 2010). For example, van Minnen (2012) found that 82% of participants rated PE as an  
299 acceptable treatment and 50% preferred it over EMDR or medication. Also, there is no  
300 difference in dropout across studies of exposure therapy, cognitive therapy, other types of CBT,  
301 and EMDR (Hembree et al., 2003). Reliable data comparing PE and CPT could help to  
302 conclusively address unfounded beliefs and biases and encourage therapists to present  
303 treatment options to patients in a neutral manner that supports patient choice.

### 304 3. *Patient preferences*

305 There are no published data on patients' preferences for PE versus CPT. Results of a recent  
306 randomized clinical trial of a PTSD decision aid that are currently being prepared for publication,  
307 34% of the participants wanted CPT after viewing the decision aid, versus 3.8% who wanted PE  
308 and 17.7% who wanted medication; 43.9% had no preference and 1.5% preferred EMDR (Watts  
309 & Schnurr, 2012). The low percentage of participants who wanted PE is surprising in light of  
310 van Minnen's (2012) finding that 50% of participants preferred PE. However, the difference  
311 could be explained by the fact that CPT or other types of cognitive therapy were not given as an  
312 option in van Minnen's study. Regardless of the reason, providing patients with reliable  
313 information about the comparative effectiveness could help them make informed choices about  
314 their care.

### 315 4. *Scientific and practical issues*

316 Given the limited evidence about the comparative effectiveness of treatments for PTSD, the  
317 proposed study would generate information that would be relevant not only to VA but also to  
318 DoD and the broader scientific community. Although there is no specific reason to indicate that  
319 Resick et al.'s (2002) results would not generalize to men and to other types of trauma

320 survivors, the applicability of the findings beyond female civilian rape survivors would be  
321 strengthened by a comparison in a more heterogeneous sample.

322 A comparison of PE to CPT has significant scientific relevance because each treatment reflects  
323 a different theoretical model of the etiology of PTSD. Prolonged Exposure is based on the  
324 Emotional Processing Theory of anxiety disorders and their treatment (Foa & Kozak, 1986) and  
325 its extension to explain the natural recovery after a traumatic experience, the maintenance of  
326 chronic PTSD, and treatment of the disorder (Foa & Cahill, 2001). Emotional Processing  
327 Theory proposes that PTSD can be conceptualized as a specific emotional structure that is  
328 characterized by two erroneous basic negative perceptions: the world is entirely dangerous and  
329 the PTSD sufferer is entirely incompetent. These perceptions are common in the immediate  
330 aftermath of a traumatic event, but are maintained by avoiding thinking about the traumatic  
331 event, which prevents processing of the event, and avoiding situations and objects that are  
332 distressing, which maintains the perception about the world as entirely dangerous and the self  
333 as entirely incompetent. According to the theory, to reduce PTSD symptoms, trauma memory  
334 must be activated and information that is incompatible with the basic erroneous perception must  
335 be incorporated in the trauma memory. This is accomplished by confronting the trauma through  
336 revisiting the traumatic memory in imagination and recounting it and processing it (to enhance  
337 organization of the traumatic memory and correct misconception about it) as well as in vivo  
338 exposure to distressing (but actually safe) stimuli which disconfirm that misconception that the  
339 world is entirely dangerous. Both kinds of exposure help disconfirm the perception of oneself as  
340 incompetent and unable to cope with stress.

341 According to the model of Cognitive Processing Therapy (Resick et al., 2002), PTSD develops  
342 because trauma survivors distort their beliefs about themselves and the world in an attempt to  
343 protect themselves from future trauma. They also tend to blame themselves or non-perpetrating  
344 others in order to maintain a belief in a just world (“I must have done something wrong, for this  
345 outcome to have occurred”). Treatment begins by focusing on distorted beliefs such as denial  
346 and self-blame and then shifts to distorted beliefs about oneself and the world (“No one can be  
347 trusted”). During treatment, patients are taught through Socratic questioning and daily  
348 worksheets to challenge their beliefs and assumptions. As beliefs become less distorted,  
349 patients generate more balanced self-statements for practice and PTSD symptoms lessen.  
350 Patients also write detailed accounts of the most traumatic incident(s) that they read to  
351 themselves and to the therapists in order to experience their natural emotions emanating from  
352 the event rather than those generated by erroneous beliefs.

353 If one treatment is found to be superior, this can further the development of understanding the  
354 etiology of PTSD and also may lead to enhanced prevention efforts, as well as refinement of  
355 existing treatments. There are also practical considerations. The standard PE protocol consists  
356 of 9-12 1.5-hour sessions, whereas the standard CPT protocol consists of 12 1-hr sessions.  
357 More sessions can be added to either treatment to achieve desired outcomes. However, the  
358 length of CPT sessions is easier to accommodate in VA, where mental health treatment  
359 sessions last 1 hour or less. CPT can also be implemented in group settings. In contrast, an  
360 important advantage of PE is that it can be used to treat other anxiety disorders such as simple  
361 and social phobia, panic disorder, and obsessive-compulsive disorder. Thus, PE offers a  
362 versatile approach that can be used to treat a wide range of patients.

363 In addition to knowing how PE and CPT compare overall, there is a similar need for information  
364 about the relative benefits for subgroups of patients. The study that compared PE and CPT  
365 (Resick et al., 2002) offers little guidance. The homogeneity of the sample in terms of gender  
366 and trauma type prevented the investigators from looking at the potential differences related to  
367 these variables. Subsequent analyses from this study (Rizvi et al., 2009) examined age,  
368 education, intelligence, depression, anger, and general (non-trauma) guilt as predictors of  
369 treatment outcome in PE and CPT. The investigators found evidence of differential symptom  
370 response to treatment for age only. Among younger women, those who received CPT had  
371 greater improvements in PTSD than those who received PE, whereas among older women,  
372 those who received PE had greater improvements. The investigators also looked at dropout,  
373 another important outcome, and found that higher baseline anger was related to dropout from  
374 PE, but not from CPT.

375 There is not enough evidence about predictors of differential treatment response in PTSD to  
376 justify powering a study to perform subgroup analysis, e.g., to examine whether men and  
377 women differ in response to PE and CPT. However, a study conducted in a large  
378 heterogeneous sample of male and female Veterans would permit exploratory analyses of  
379 predictors of response to PE and CPT. The information obtained would guide future research  
380 about what works for whom, a key goal of comparative effectiveness research and a necessary  
381 ingredient in delivering optimal, Veteran-centered care.

#### 382 **D. Importance of the Proposed Research to VA**

383 Of the almost 5.4 million Veterans who used VA care in FY 2011, 8.9% had a diagnosis of  
384 PTSD, including 8.7% of men and 11.6% of women. Prevalence is even higher in returning

385 Veterans who use VA care: almost 1 in 4 OEF/OIF/OND Veterans seeking VA care has PTSD  
386 (VA Northeast Program Evaluation Center, 2012). Prevalence is also high in Veterans of other  
387 cohorts (Fontana & Rosenheck, 2008), including those who have experienced military sexual  
388 trauma (Kimerling et al., 2008) and mild traumatic brain injury (Hoge et al., 2008). Furthermore,  
389 the costs associated with disability compensation for PTSD have increased substantially since  
390 the wars in Iraq and Afghanistan. In FY 2011, PTSD was the 3<sup>rd</sup> most prevalent service-  
391 connected disability, with 501,280 Veterans receiving some level of disability compensation for  
392 PTSD (Veterans Benefits Administration, 2012).

393 VA has a vested interest in understanding the relative effectiveness of PE and CPT (see  
394 **Section XVII** for a letter of support from Dr. Antonette Zess, Chief Consultant for Mental Health  
395 Services). Both treatments are recommended at the highest level in the VA/DoD PTSD Practice  
396 Guideline (Departments of Defense and Veterans Affairs, 2010). According to the Uniform  
397 Mental Health Services Handbook, VA is required to make these treatments available to  
398 Veterans seeking PTSD care. PE and CPT are being disseminated nationally across the VA  
399 system in order to enhance the availability of evidence-based treatments to Veterans with PTSD  
400 (Karlín et al., 2010). In FY 2011, VA instituted a new quality measure to enhance the likelihood  
401 that patients with PTSD will receive an evidence-based therapy like PE or CPT: specifically, the  
402 percentage of OEF/OIF/OND Veterans who engage in a new episode of care who receive at  
403 least 8 psychotherapy sessions in 14 weeks, which is a minimum frequency for treatments like  
404 PE and CPT. VA also has developed a national PTSD Mentoring Program for PTSD Program  
405 Administrators to help them manage their clinics to permit the delivery of these treatments.  
406 Every facility has an evidence-based therapy coordinator as well to facilitate training in  
407 evidence-based psychotherapy. In FY 2013 VA will be launching templates to facilitate note-  
408 writing in order to support delivery of PE and CPT.

409 Information about the relative effectiveness of PE and CPT is needed to help guide VA practice  
410 and policy. VA is emphasizing Veteran-centeredness and patient choice in healthcare options.  
411 Because there is no definitive information about how PE and CPT compare, Veterans have  
412 limited information on which to base their choice between the treatments, if both are available.  
413 Therapists are making their decisions about which treatments to offer based on their own  
414 experiences and beliefs. As described in **Section I.C.2**, these beliefs can be strong and  
415 erroneous. We confronted this problem directly when conducting CSP #494, which evaluated  
416 the effectiveness of PE for female Veterans and Soldiers (Schnurr et al., 2007). In the process  
417 of recruiting therapists we encountered opposition from some who felt that VA patients were too

418 complicated and fragile to do exposure therapy. Findings from CSP #494 indicated that PE was  
419 not only effective, but also safe and feasible. Yet findings from the ongoing study of the  
420 implementation of PE and CPT in VA residential programs described above show that VA  
421 providers hold more favorable beliefs about CPT (Cook et al., 2012). Although there is  
422 equipoise with respect to the potential effectiveness of the treatments, it is likely that patient  
423 choices are not sufficiently informed by evidence.

#### 424 **E. Feasibility of a Cooperative Study within the VA**

425 A multi-site study is required to attain the statistical power needed for a study that aims to  
426 compare two effective treatments and to examine factors that relate to differential treatment  
427 response. Power is a key consideration. It would not be possible to obtain sufficient power with  
428 data from a single site, or even from a few sites. In addition, the multiple sites enhance  
429 generalizability of findings and will help us obtain a more realistic effect size than we might from  
430 using just a few sites.

431 VA is uniquely positioned to conduct a study that would be extremely difficult at best to do in the  
432 civilian sector. The VA Cooperative Studies Program is able to efficiently support the number of  
433 sites needed. In addition, the national rollouts of PE and CPT have enhanced the ability to do  
434 large-scale psychotherapy research on these treatments. As of August 2012, approximately  
435 4,600 VA therapists have been trained in one or both treatments. We will require participating  
436 sites to have at least 4 therapists who are proficient in PE and 4 who are proficient in CPT (i.e.,  
437 they have been trained and undergone case consultation).

438 At present 75 sites meet this criterion, and more are expected to qualify as the rollouts continue.  
439 We have received letters of interest from 36 sites to date (see Volume 2 of the study protocol for  
440 letters). There is a high degree of enthusiasm at these sites for taking part in the trial. The  
441 locations, and the number of unique outpatients treated for PTSD at these locations in FY 2011,  
442 are listed in **Table I.4**. Thirteen of these sites are part of VA's Women's Health Practice-Based  
443 Research Network (PBRN), which has agreed to work with us to ensure enrollment of adequate  
444 numbers of women in the trial (see **Section XVII** for a letter of support from Dr. Susan Frayne).  
445 Five sites are newly approved CSP NODES sites, and 4 of these sites also are PBRN sites. We  
446 also will give consideration to sites that have a high number of enrolled OEF/OIF/OND Veterans  
447 to ensure adequate representation of this cohort.



**Table I.4. PTSD Outpatients in FY 2011 at Sites Expressing Interest in Participating in CSP #591**

| Site                 | Number of Patients | Site                  | Number of Patients |
|----------------------|--------------------|-----------------------|--------------------|
| Alexandria, VA       | 2133               | Long Beach, CA†       | 4278               |
| Asheville, NC        | 2845               | Madison, WI           | 1650               |
| Atlanta, GA          | 6948               | Miami, FL*            | 4075               |
| Central CA/Fresno    | 2060               | Minneapolis, MN*†     | 3205               |
| Coatesville, PA*     | 1236               | Montana HCS           | 2152               |
| Chicago, IL/Hines*†  | 3641               | Nebraska/Western Iowa | 2417               |
| Chicago, IL/Lovell   | 1737               | New Orleans, LA*      | 4284               |
| Chillicothe, OH      | 1756               | Philadelphia, PA*     | 5966               |
| Cincinnati, OH       | 2973               | Phoenix, AZ           | 6325               |
| Cleveland, OH        | 5606               | Poplar Bluff, MO      | 1917               |
| Columbia, MO         | 2179               | Portland, OR*†        | 5261               |
| Durham, NC*          | 5448               | Salisbury, NC         | 5976               |
| Eastern Colorado HCS | 8003               | St. Louis, MO*        | 3234               |
| Eastern Kansas HCS*  | 3471               | San Francisco, CA*    | 3450               |
| Fayetteville, AR     | 5633               | San Juan, PR          | 2370               |
| Houston, TX*†        | 7622               | VA Puget Sound, WA*   | 8906               |
| Kansas City, MO      | 3146               | VA Maine HCS          | 3344               |
| Loma Linda, CA       | 5491               | Western NY/Buffalo    | 3247               |

\*Site in the Women's Health Practice-Based Research Network; †Site in NODES program.

448 If we assume that only 5% of patients are enrolled, we find that a site with at least 1280 unique  
 449 patients should be able to recruit 64 patients over a 2.5-year period. All of the potential sites  
 450 except 1 (Coatesville, PA, which would have to enroll 5.2%) have a number of patients that  
 451 would exceed this threshold. The remaining sites would have to enroll less than 1% to 3.9%.

452 Furthermore, our inclusion and exclusion criteria were designed to yield a maximally  
 453 generalizable sample of patients for comparative effectiveness, replicating insofar as possible  
 454 the actual patients with whom these treatments could be used (**Section IV.A**). The aim of the  
 455 criteria is to promote participants' safety and their ability to engage in treatment. Inclusion  
 456 requires that a person have PTSD and have telephone access or be able to come to VA for  
 457 phone interview. A participant also must agree to study conditions: recording of assessments  
 458 and treatment sessions and not receiving other treatment for PTSD (except medication and self-  
 459 help groups) while receiving study treatment. In CSP #494, of 353 potential participants who  
 460 met with staff to learn about the study, only 5 refused to agree to study conditions, none refused  
 461 consent, and 28 simply did not continue, for a total of 9%. Exclusion criteria are nonrestrictive

462 and most are conditions that could change and allow future eligibility: significant cognitive  
463 impairment, suicidality, homicidality, and current (but not past) substance dependence,  
464 psychotic symptoms, and mania (including manic phase of bipolar disorder). In FY 2011, 11.8%  
465 of VA patients with PTSD had alcohol dependence (D. Kivlahan, personal communication,  
466 October 17, 2012), less than 1% of OEF/OIF/OND VA users diagnosed with PTSD also  
467 sustained severe TBI (N. Sayer, personal communication, October 17, 2012), and only 1.20%  
468 (7,361 of 611,357) of Veterans with a PTSD diagnosis had a reported FY11 non-fatal suicide  
469 attempt (J. Kemp, personal communication, October 17, 2012). Although we have been unable  
470 to find a data source that would permit us to apply our criteria to derive precise estimates of the  
471 number of eligible patients per site and the above data do not reflect all of our criteria, the  
472 prevalence of exclusionary rule-outs is not likely to impair feasibility of recruiting a sufficient  
473 number of eligible patients.

474 In reality, the number of potentially eligible Veterans is likely to be larger than indicated in **Table**  
475 **I.4**. The number of patients who received treatment for PTSD in the VA increased by 356,781  
476 (249.4%) between 1997 and 2010, not only because of the wars in Iraq and Afghanistan but  
477 also due to increased number of Vietnam Veterans seeking PTSD care (Hermes et al., 2012).  
478 Since 2005, growth has increased at an annual rate of 14.8%, compared with 12.6% between  
479 1997 and 2005. In FY11, 476,515 men and 38,002 women who received specialized mental  
480 health treatment in VA were seen for a diagnosis of PTSD (VA Northeast Program Evaluation  
481 Center, 2012). Approximately 93% used outpatient mental healthcare. The number of mental  
482 health visits by PTSD patients increased 1.6% annually from 1997 to 2005, and then jumped  
483 19.6% annually from 2005 to 2010, when the average number of visits was 14.8 (Hermes et al.,  
484 2012). Thus, the growing prevalence of PTSD in users of VA healthcare supports the feasibility  
485 of the trial as well.

486 The feasibility of the trial is further enhanced by the fact that treating a patient on the study  
487 protocol could help a facility meet the new PTSD quality measure of delivering 8 sessions of  
488 psychotherapy in 14 weeks. Another important factor is how the ongoing dissemination  
489 initiatives will reduce startup time and overall costs. In our prior VA Cooperative Studies and in  
490 psychotherapy research more generally, the initial months of start-up include training therapists  
491 and providing expert supervision while they treat practice cases. Costs also are increased by  
492 the need to provide careful supervision as they gain increased proficiency while treating study  
493 cases. We can decrease the substantial costs of training and supervision by using therapists  
494 who have completed the required VA training in PE or CPT and received the case consultation

495 that is necessary for being specifically designated as a PE or CPT provider. Using trained  
496 therapists also decreases study duration by 6-9 months, along with the associated infrastructure  
497 costs for study management. We also have developed efficient and cost-effective methods of  
498 providing ongoing supervision in the dissemination initiatives. Use of these methods further  
499 enhances the feasibility and generalizability of the proposed project.

500 Controlled studies have demonstrated the effectiveness and acceptability of PE and CPT in  
501 male and female Veterans (Monson et al., 2006; Nacasch et al., 2011; Schnurr et al., 2007).  
502 Pilot studies have further demonstrated the effectiveness and acceptability in OEF/OIF/OND  
503 Veterans (Chard et al., 2010; Rauch et al., 2009; Yoder et al., 2012) and feasibility of treating  
504 Veterans with traumatic brain injury (TBI) (Chard et al., 2011). Thus, the treatments would be  
505 broadly applicable across a range of VA patients with PTSD.

506 Our record and experience further support the feasibility of the proposed study. The Principal  
507 Proponents and members of the Planning Committee have a demonstrated record of  
508 successfully conducting multisite psychotherapy research studies in VA, including 2 VA  
509 Cooperative Studies, CSP #420 (group therapy for male Vietnam Veterans; Schnurr et al.,  
510 2003) and CSP #494 (PE for female Veterans and active duty personnel; Schnurr et al., 2007).  
511 Drs. Foa and Resick are the developers of PE and CPT, respectively, and have conducted  
512 many of the most influential trials of PTSD treatment (e.g., Foa et al., 2005; Resick et al., 2002).  
513 In addition to his experience in conducting psychotherapy trials, Dr. Friedman brings experience  
514 in pharmacotherapy research and programmatic support from his leadership role in the PTSD  
515 Mentoring Program.

516 Members of the Planning Committee also designed the VA's national rollouts of the treatments  
517 we propose to compare. Co-Chairs Chard and Ruzek direct these rollouts and Dr. Eftekhari is  
518 the manager for the PE rollout. Dr. Tuerk is a PE expert and a trainer for the PE rollout.  
519 Furthermore, we have significant support from the Mental Health Services program office: Dr.  
520 Sonja Batten, Deputy Chief Consultant for Specialty Mental Health, and Dr. Brad Karlin,  
521 National Mental Health Director for Psychotherapy and Psychogeriatrics (who leads VA's  
522 Evidence-Based Psychotherapy program), have served as part of the Planning Committee and  
523 are committed to facilitating the success of the trial (see the letter of support in **Section XVII**).  
524 Dr. Jennifer Vasterling, a neuropsychologist and Co-Proponent of CSP #566  
525 ("Neuropsychological and Mental Outcomes of Operation Iraqi Freedom (OIF): A Longitudinal

526 Cohort Study”), brings expertise in TBI and the use of conducting diagnostic assessment by  
527 telephone.

## 528 **F. Summary**

529 Despite solid evidence that PE and CPT are effective treatments for PTSD in Veterans and non-  
530 Veterans, there is insufficient evidence about the relative effectiveness of these treatments. A  
531 comparative effectiveness trial of PE and CPT would be important from both a practical and a  
532 scientific standpoint, and have relevance within and outside VA:

- 533 • First, there is a pressing need to understand how the treatments compare with one  
534 another in order to assist VA leadership, clinicians, and Veterans in making informed  
535 choices about the delivery of PTSD care in VA. The attached letter from Dr. Antonette  
536 Zeiss, Chief Consultant in VA Mental Health Services, specifically describes how the  
537 study results would help to strengthen policy and practice of mental health care in VA. A  
538 unique advantage for this study is that there are administrative structures led by  
539 members of the study team—specifically the Evidence-Based Psychotherapy Program  
540 and the PTSD Mentoring Program—that exist to facilitate implementation of study  
541 findings. The findings would inform clinical practice outside VA as well.
  
- 542 • Second, there is a compelling scientific reason to compare the treatments. They are  
543 based on differing theories about the development of PTSD. A demonstration that one  
544 treatment is superior to the other would further scientific exploration by challenging  
545 theoretical accounts of etiology and treatment. Better evidence about etiology and  
546 underlying mechanisms would then have the potential for advancements in the  
547 prevention and treatment of PTSD. The Agency for Healthcare Research and Quality  
548 (2012) has recommended comparative effectiveness trials of effective PTSD treatments  
549 and the Institute of Medicine (2008) specifically noted the need for research on  
550 Veterans.
  
- 551 • And third, the available evidence is suggestive but not conclusive. With only one head-  
552 to-head comparison that was conducted in a relatively small and select sample of non-  
553 Veteran trauma survivors, it is not possible to draw reliable conclusions about the  
554 comparative effectiveness of PE and CPT. A large multi-site trial with men and women  
555 would substantially strengthen the inferences that could be drawn from the study and the  
556 study’s impact on the field.

557 When designing the study, we considered the option of proposing an equivalence design given  
558 the limited evidence suggesting that the treatments differ. We also considered proposing a  
559 traditional superiority design, hypothesizing that CPT is superior to PE given the 2012 AHRQ  
560 report and the rollout data favoring CPT. However, because methodological factors may  
561 account for the apparent difference between PE and CPT, we decided to propose a traditional  
562 superiority design with a nondirectional hypothesis. We believe the question it allows us to  
563 ask—*is one treatment better than the other?*—is the most important and most appropriate  
564 given the available evidence.

565 By designing a study large enough to detect a small difference ( $d = .25$ ), we are willing to risk  
566 the possibility that the true difference between PE and CPT is smaller. If so, the difference  
567 would have little scientific or practical value. In contrast, finding that one treatment is superior  
568 would enhance understanding of both etiology and treatment and yield information that is  
569 actionable. If CPT is more effective than PE, the fact that CPT involves shorter sessions could  
570 encourage more efficient use of resources. If PE is more effective, this would provide important  
571 justification for both clinicians and patients about the relative benefits of a treatment that they  
572 might otherwise avoid because of the intense trauma focus elements. Regardless of which  
573 treatment is better, patients would have more information to help them make an informed  
574 decision about which treatment to choose and VA would have stronger evidence to help make  
575 care Veteran-centered.

576  
577

578 **II. SPECIFIC OBJECTIVES**

579 This study is designed to provide information for patients, clinicians, administrators, and  
580 policymakers about the comparative effectiveness of treatments for PTSD.

581 **A. Primary Objective**

582 The primary objective is to compare the effectiveness of Prolonged Exposure and Cognitive  
583 Processing Therapy for reducing the severity of PTSD symptoms.

584 **B. Secondary Objective**

585 The secondary objective is to compare the effectiveness of Prolonged Exposure and Cognitive  
586 Processing Therapy for reducing the severity of comorbid mental health problems and service  
587 utilization and improving functioning and quality of life.

588 **C. Tertiary Objective**

589 The tertiary objective is to examine whether discrepancy between patient preferences and  
590 treatment assignment reduces the effectiveness of each treatment.

591 **D. Exploratory Analyses**

592 Exploratory analyses will examine whether demographic and clinical characteristics predict  
593 differential response to PE and CPT. Although data are insufficient to justify a much larger  
594 study to address the question of which treatment works for which patients, these exploratory  
595 analyses can generate findings to inform future hypothesis-driven research.

596 Exploratory analyses also will characterize amount and quality of treatment and examine how  
597 treatment dose (e.g., number of sessions, total number of hours), treatment engagement  
598 (homework), and treatment fidelity (therapist adherence and competence) relate to outcomes  
599 within and between treatments.

600

601

602 **III. SUMMARY OF STUDY DESIGN**

603 The study will be a prospective randomized clinical trial with blinded assessment. The  
604 population will be male and female Veterans with PTSD due to any traumatic military event.  
605 Patients who are eligible and agree to participate in the study will be randomly assigned to  
606 receive Prolonged Exposure or Cognitive Processing Therapy. Prior to randomization, patients  
607 will be stratified by hospital.

608 The primary outcome is improvement in PTSD symptom severity as measured by change on  
609 the Clinician-Administered PTSD Scale after treatment (Weathers et al., 2001). The outcome  
610 measure will be determined from regular follow-up visits of the participants, which will occur  
611 prior to, at the middle and at the end of treatment and then 3 and 6 months later (**Table II.1**).

612 **Table II.1. Participant Flow Through the Trial**

| <b>Week</b> | <b>Event</b>                                                                                                                                                                                                                                                |
|-------------|-------------------------------------------------------------------------------------------------------------------------------------------------------------------------------------------------------------------------------------------------------------|
| *           | (Initial entry into Mental Health program for self-referrals)                                                                                                                                                                                               |
| *           | Screening phase 1: Referral source questioned regarding inclusion and exclusion criteria                                                                                                                                                                    |
| *           | Screening phase 2: First meeting with potential participant to explain the study protocol, obtain consent, gather information about demographic background and MST and TBI history, screen for cognitive impairment, and administer baseline questionnaires |
| *           | Screening phase 3: Participant is interviewed by telephone to establish inclusion and exclusion diagnoses and obtain treatment preference                                                                                                                   |
| *           | Randomization assigned                                                                                                                                                                                                                                      |
| *           | Scheduling of initial session with therapist                                                                                                                                                                                                                |
| 1           | Treatment begins                                                                                                                                                                                                                                            |
| 6           | Midtreatment Assessment**                                                                                                                                                                                                                                   |
| 12          | Treatment ends**                                                                                                                                                                                                                                            |
| 13          | Posttreatment assessment**                                                                                                                                                                                                                                  |
| 24          | Interim assessment (3 months)**                                                                                                                                                                                                                             |
| 36          | Final assessment (6 months)**                                                                                                                                                                                                                               |

613 \* *Enrollment typically will take about 1 month. \*\*The schedule is presented for a standardized participant. Actual*  
614 *time to complete treatment may vary as described in **Section VIII.B.2** and **Section VIII.B.3**.*

615 **A. Study Population**

616 Participants will be male and female Veterans with PTSD due to any military event. Inclusion  
617 and Exclusion Criteria are described in **Section IV.A**.

618 **B. Study Treatments**

619 The study treatments are Prolonged Exposure and Cognitive Processing Therapy. The  
620 treatments are described in **Section V**.

621 **C. Outcome Measures**

622 The primary outcome is improvement in PTSD symptom severity on the Clinician-Administered  
623 PTSD Scale. A complete description of the measures is provided in **Section VII** and the  
624 assessment procedures are described in **Section VIII.A**.

625 **D. Sample Size**

626 In order to detect a standardized mean difference in improvement in PTSD symptom severity of  
627  $d = .25$ , a sample size of 900 randomized participants provides 90% power to detect a  
628 difference between arms using the linear mixed effects model with a two-sided  $\alpha = .05$ . A  
629 detailed description on sample size and power considerations is given in **Section X**.

630 **E. Study Monitoring**

631 The intake rate and operational aspects of this study will be monitored continuously by the  
632 Study Chair and Study Biostatistician. Participating medical centers will continue in the study  
633 only if adequate patient intake is maintained, as defined by the Data Monitoring Committee  
634 (DMC) at its first meeting prior to the start of the study. A complete description of interim study  
635 monitoring is given in **Sections E and XII.D**.

636

637



638 **IV. PATIENT POPULATION AND PATIENT RECRUITMENT**

639 **A. Inclusion and Exclusion Criteria**

640 Participants will be male and female Veterans with PTSD due to any military event. Selection  
641 criteria will follow those used in CSP #494 and other trials of PE and CPT as well as the PE and  
642 CPT rollouts to ensure feasibility and participant safety.

643 **Inclusion criteria:** Current PTSD and symptom severity of the DSM-V equivalent of 45 or  
644 higher on the DSM-IV Clinician- Administered PTSD Scale (Weathers et al., 2001); agreement  
645 to not receive psychotherapy for PTSD during study treatment; to allow digital recording of  
646 phone interviews and therapy; and regular access to a telephone (or agreement to come to the  
647 VA for centrally conducted telephone interviews for participants who do not have telephone  
648 access). Medication for PTSD and other mental or physical conditions, psychotherapy for other  
649 problems, brief visits with an existing therapist, substance abuse treatment, and self-help  
650 groups will be allowed. Individuals who are taking psychoactive medication must be on a stable  
651 regimen (no dose or medication change) for 30 days prior to study entry. Monitoring for  
652 psychoactive medications will occur at the Phase 1 Screen and immediately prior to the Phase 2  
653 Screen (when participants give informed consent and formally enter the study). Site personnel  
654 will document that they checked each participant's psychoactive medication regimen at study  
655 entry in the medical record or the patient binder.

656 **Exclusion criteria:** Substance dependence not in remission for at least 1 month; current  
657 psychotic symptoms or mania (or manic phase of bipolar disorder); significant current suicidal or  
658 homicidal ideation that includes a specific plan; or moderate to severe cognitive impairment  
659 defined as 1 *SD* below age-graded norms on the Montreal Cognitive Assessment [MoCA]  
660 (Nasreddine et al., 2005).

661 Patients who are currently incarcerated are not eligible to participate in the study. If a patient  
662 becomes incarcerated during the course of their participation in the study, the patient will be  
663 withdrawn immediately. Patients may be re-consented and re-enroll in the study if they are still  
664 eligible to participate upon their release.

665 **B. Recruitment**

666 Participants will be recruited from VA specialty and general mental health clinics, primary care,  
667 deployment health clinics, Vet Centers, and the community. The sites will be encouraged to use

668 a variety of recruitment strategies: presentations by the Local Site Investigator (LSI) or Study  
669 Coordinator (SC) to clinical personnel at the referral programs to remind them about the study;  
670 attendance at clinical team meetings; follow-up with individual clinicians; networking with  
671 Veterans groups likely to yield potential participants; advertising; and direct contacts of Veterans  
672 who have not opted out after receipt of an introductory letter. We also have engaged the  
673 support of the Women’s Health Practice-Based Research Network to enhance the enrollment of  
674 women in the trial (see the attached letter from Dr. Susan Frayne, the Network’s Director, and  
675 see attached “Women’s Enhanced Recruitment Process [WERP]” memo) and expect support  
676 from NODES directors at participating sites as well. Under WERP, special efforts will be made  
677 to enhance recruitment of women at the CSP NODES sites that are co-located with PBRN sites  
678 and, as much as possible, at all CERV-PTSD sites.. In particular, CSP NODES sites that are  
679 co-located with PBRN sites will have supplemental SC time that they will invest in recruitment of  
680 women to this study, applying IRB-approved recruitment procedures. Women are an extreme  
681 minority group among Veterans in VA and are likely to be under-represented without such active  
682 outreach efforts. Achieving enhanced representation of women is important so as to allow for  
683 exploratory analyses of whether gender predicts differential response to the PTSD treatments  
684 studied here.

685 At each site, potential participants will be referred to the Site Coordinator by clinical staff in VA,  
686 Vet Center, or non-VA settings. Potential participants also may contact the SC directly.  
687 Alternatively, after receipt of an introductory letter, potential participants who do not opt out may  
688 be contacted directly by the SC.

689 1. *Clinician referrals*

690 The SC or LSI will provide clinicians at their site with information about inclusion and exclusion  
691 criteria to assist them in making appropriate referrals. To make a referral, a clinician will need  
692 sufficient information about the potential participant to answer the Phase I screening questions  
693 about probable PTSD DSM-5 diagnoses. In cases where the referring clinician does not have  
694 sufficient information for Phase 1 screening, he or she must obtain it from the potential  
695 participant if the recruitment process is to continue.

696 A clinician may mention the study to a patient who the clinician feels would be an appropriate  
697 referral, or a patient may ask the clinician about the study after having heard about it through  
698 advertising. Clinicians at the sites will be provided with brief information sheets about the study

699 in order to facilitate this process. If the patient agrees to be referred, the clinician would then  
700 contact the SC, who would then conduct the Phase 1 screening with the clinician.

701 At times, informal “offline” discussions between the SC/LSI and a referring clinician to determine  
702 eligibility of potential study participants may help facilitate the referral process. For example, a  
703 clinician might first call the SC/LSI to discuss whether approaching a particular Veteran would  
704 be appropriate for the study if the Veteran had PTSD due to military trauma experienced outside  
705 a warzone (yes). These discussions may be more frequent at the beginning of the study than at  
706 the end, by which time clinicians are likely to have a better sense of patients who are  
707 appropriate for referral.

## 708 2. *Self-referrals*

709 Potential participants who contact the Site Coordinator directly will be given information that will  
710 enable them to decide whether they want to be considered for the study, i.e., purpose of the  
711 study, the two treatment conditions, use of random assignment, time commitment required for  
712 both treatment and assessment, and schedule of payments they would receive for participation.  
713 Potential participants who are currently in treatment will be asked to discuss their participation  
714 with their current therapist, and if this therapist is not a staff member at the site, the potential  
715 participant will be referred to the clinical program at the site for an initial intake into that  
716 program. Once the potential participant has received an intake interview, the recruitment  
717 process would proceed as described in the clinician referral procedures in section **IV.B.1**.

## 718 3. *SC-initiated direct contacts to women Veterans who appear to be potentially eligible for* 719 *the study*

720 An additional approach which may be used as needed to boost recruitment of women Veterans  
721 is for research staff to directly contact patients. This will involve several steps.

722 *Step 1: Identify potentially eligible women Veterans in the sampling frame.* One approach to  
723 developing the sampling frame may be for the SC to review clinic lists (available locally) of  
724 potentially eligible women Veterans with upcoming clinic appointments in primary care or mental  
725 health clinics who are potentially eligible for the study (based upon evidence of PTSD in the  
726 local clinical databases, or based upon clinician input). Another potential approach to  
727 developing the sampling frame may be for research staff in the CSPCC to pull lists of potentially  
728 eligible women Veterans (women Veterans with evidence of PTSD in VINCI databases),

729 including their name, SSN, and mailing address. CSPCC research staff would then move this  
730 “sampling frame” for particular participating site to a site-specific folder on the secure server at  
731 CSPCC; each Site Coordinator can access his/her own site-specific folder on the CSPCC  
732 server.

733 *Step 2: Refine the list via chart review.* The SC may review the chart of women Veterans on the  
734 sampling frame list, to eliminate those who clearly do not meet study criteria. The SC may also  
735 consult with a clinician who is familiar with the patient, if additional information is needed to  
736 supplement the chart review.

737 *Step 3: Mail introductory letter.* For women Veterans who appear potentially eligible for the  
738 study based upon Steps 1 and 2, the SC will mail a letter notifying the Veterans that they may  
739 be contacted about possible participation in a research study. A call-back number and a self-  
740 addressed stamped envelope and an opt-out card will be included in the mailing. Opt-in  
741 instructions will also be included, for those who want to self-refer to the study.

742 *Step 4: Directly contact Veterans who do not opt out.* For women Veterans who do not opt out  
743 by telephone or mail within 14 days of sending the introductory letter, the SC will make two  
744 attempts to contact the Veteran by telephone to orient her to the study (see Telephone Script).  
745 If the potential participant is interested, then (a) the SC will invite her to attend a mental health  
746 intake visit to assess potential eligibility for the study, or, (b) if, after Phase 1 referral  
747 conversation with the patient’s clinician, the SC has already determined that she is appropriate  
748 for referral to the study, then the SC will invite her directly to a Phase 2 visit (see IV.C.1).

749 *4. SC-initiated direct contacts to all women patients at a facility*

750 The prior section describes the process of sending a letter to women Veterans who appear to  
751 have PTSD based upon chart review. An additional recruitment option that sites may use as  
752 needed is to apply the above procedures (opt-out letter followed by a phone call) to *all* women  
753 Veteran patients at the facility, as a mechanism for identifying women with PTSD symptoms  
754 whose PTSD is not identified by searching clinical records or VINCI databases. A letter will be  
755 sent (in batches) to all women at the facility. Women with evidence of PTSD (as described in  
756 the prior section) who do not opt out will be called by research staff to ascertain their interest in  
757 the study. Women without evidence of PTSD in VINCI/on chart review will be contacted only if  
758 they actively opt-in; this has the advantage of being an approach that will allow for identification  
759 of some women with PTSD symptoms not currently being addressed in VA.

760 5. *Women's Enhanced Recruitment Process (WERP)*

761 To ensure women are well represented in the study sample, the recruitment processes  
762 described above will take into consideration approaches that maximize recruitment of women.  
763 For example, Women's Health providers may be among the clinicians approached about this  
764 study (with the support of the Women's Health Practice-Based Research Network [PBRN] Site  
765 Lead, at those locations that are part of the PBRN); presentations may be given to groups of  
766 women Veterans, among other networking venues; advertisements may be posted in areas  
767 frequented by women Veterans, among other locations; and women Veterans may be directly  
768 called by the SC after sending an introductory letter, as described above.

769 6. *Efforts to support recruitment*

770 The National Study Coordinator at the Chair's office will contact each Site Coordinator by phone  
771 every other week to support recruitment efforts. The National Study Coordinator also will  
772 conduct monthly conference calls with all Site Coordinators in order to discuss issues related to  
773 all aspects of study management. Our experience in CSP #420 and CSP #494 was that a  
774 combination of individual and group contact helped to identify and resolve problems and to  
775 share lessons learned across sites. In addition, the Chair's office also will place a notice about  
776 the study on the National Center for PTSD website and will explore other centralized  
777 mechanisms of generating referrals.

778 **C. Screening and Consent**

779 The diagnostic assessments done at study entry will provide final determination of a  
780 participant's eligibility for the study by confirming the inclusion and exclusion psychiatric  
781 diagnoses. We propose to use screening and consent processes the study team has employed  
782 successfully in CSP #420 and CSP #494. All participants, including self-referrals, will enter the  
783 study through referral by a mental health clinician or other qualified clinician at the participating  
784 site. Participants who are not currently receiving treatment at the site will first undergo an intake  
785 at the site's mental health program so that a clinician there can refer them. This strategy helps  
786 provide continuity of care for potential participants who do not enter the study, or who terminate  
787 from treatment early or need additional treatment during the study.

788 Screening information will be obtained in three phases, structured so as to minimize both  
789 participant burden and cost to the study due to extensive assessment of ineligible participants.

790 1. *Phase 1*

791 In the first phase of screening, the Site Coordinator will consult the referring clinician in order to  
792 establish a provisional PTSD diagnosis and other inclusion and exclusion criteria. In CSP #420  
793 and CSP #494 this strategy resulted in a highly efficient screening process. For example, in  
794 CSP #494, 43 of the 396 patients who were discussed with a referral source were ruled out at  
795 this phase. Of the 353 patients who met with study staff, 320 were screened and 284 were  
796 randomized—71.7% of those discussed and 88.8% of those screened.

797 The referral clinician also would be asked to agree at this time to not treat the participant for  
798 PTSD while the participant is receiving study treatment, and would be reminded that treatment  
799 for other problems and brief check-ins are possible. The Site Coordinator will then schedule  
800 potential participants who are eligible based on the information provided by the referral source  
801 for Phase 2 screening. The SC will contact the potential participants initially by phone (up to 5  
802 times) and then by mail with a letter.

803 2. *Phase 2*

804 During the second phase of screening, the Site Coordinator will review the Informed Consent  
805 form with a potential participant to explain the study in more detail. Participants will be fully  
806 informed of the nature and extent of study participation, the objectives of the study, and the two  
807 treatments to which they will be randomly assigned. In order to enhance participants'  
808 understanding of the treatments, the Site Coordinator will also read a brief standardized  
809 description of each treatment and will provide a written description of each treatment for  
810 participants to take home. Participants will be informed of the fee payment structure that they  
811 will receive for completing assessments they undergo as part of the project. Site Coordinators  
812 will be trained to make sure that all participants comprehend the nature of the study and the  
813 wording of the consent form and will provide a copy of the form for participants to take home.

814 After obtaining consent, the Site Coordinator will administer demographic questions, the  
815 VA TBI and MST screens, suicide and homicide screening, and the MoCA (Nasreddine et al.,  
816 2005). If responses on the suicide or homicide screen indicate significant risk, the  
817 Veteran is not eligible for the study, and the Site Coordinator will contact a project-affiliated  
818 mental health clinician who will conduct suicide risk assessment guided by VA's Suicide Risk  
819 Assessment Guide Reference Manual and VA Assessment Pocket Card (2007). If on the basis  
820 of the risk assessment the Veteran is found to be at risk for suicide or homicide and in need of

821 intervention, the clinician will develop a safety plan agreed upon with the Veteran. All safety  
822 plans for suicidal patients will be created according to the standard procedures described in the  
823 VA manual, "Safety Plan Treatment Manual to Reduce Suicide Risk: Veteran Version" (Stanley  
824 & Brown, 2008). Safety plans for homicidal patients will be developed following local and  
825 national directives. All plans may include support from the VA, family contacts and friends, and  
826 other people the patient trusts. Safety plans will also incorporate the VA Veterans Crisis Line  
827 phone number: 1-800-273-TALK (8255) as a support outlet.

828 In addition, the Site Coordinator will contact the referring VA clinician to ensure that patient and  
829 clinician work together to address any clinical need. Any safety plan that has been created by  
830 the project-affiliated clinician will be communicated to the referring VA clinician.

831 The MoCA was initially designed to detect mild cognitive impairment. However, new findings  
832 based on a larger, more diverse normative sample have shown that (a) the initially  
833 recommended cutpoint of 26 is too sensitive, especially for the goal of excluding only cases of  
834 more extensive cognitive impairment and (b) there are meaningful differences across age  
835 groups not taken into account by the original cutpoint of 26 (Rossetti et al., 2012). Based on  
836 these new findings, we propose defining impairment as 1 SD below age-graded norms as  
837 follows: younger than 35 years (< 21); 35-44 years (< 20); and 45 years or older (< 18).

838 Potential participants who do not rule out based on the MoCA or suicide or homicide screens  
839 and who agree to continue will then complete baseline questionnaires and be scheduled for a  
840 screening interview with one of the centralized Assessors in Phase 3.

### 841 3. *Phase 3*

842 In the third phase of screening, Masters- or Doctoral-level Assessors at the Boston VA Medical  
843 Center will contact potential participants by telephone to assess PTSD and other psychiatric  
844 diagnoses, employing procedures currently in use in CSP #566 and Project VALOR, a registry  
845 study of OEF/OIF/OND Veterans (**described in Section VIII.A.2**).

846 Because the study would begin after the adoption of DSM-5 criteria (scheduled for finalization in  
847 January 2013 and official release in May 2013), we will use versions of the CAPS (Weathers et  
848 al., 2001) and the Structured Clinical Interview for DSM-IV (SCID; Spitzer et al., 1995) that have  
849 been updated to reflect changes to the diagnostic criteria for PTSD and other disorders. The  
850 phone interview also will include measures of treatment preference. The phone interviews are  
851 estimated to require 2-2.5 hours, and may be broken into two sessions, as needed.

852 Participants meeting eligibility criteria will then be assigned to treatment. As indicated in  
853 **Section VI.A**, the Site Coordinator will use the system established by the Palo Alto CSPCC to  
854 obtain the participant's treatment assignment. The Site Coordinator will contact the participant  
855 by phone to provide information about the participant's treatment assignment and schedule the  
856 participant's initial therapy appointment. If more than 30 days elapses between the Phase 3  
857 appointment and the first treatment session, the CAPS will be re-administered to allow for an  
858 accurate baseline measurement. The SC will attempt to contact the participant by phone 5  
859 times and finally with a letter requesting a response of interest in the study. If there is still no  
860 response it will be assumed that the potential participant is no longer interested in the study.

## 861 **V. TREATMENT**

### 862 **A. Prolonged Exposure**

863 **Prolonged Exposure** (Foa et al., 2007) is a manualized, 90-minute, 8-15 week treatment  
864 program based on emotional processing theory (Foa & Kozak, 1986; Foa & Cahill, 2001), which  
865 posits that anxiety disorders, including PTSD, reflect pathological fear structures in which  
866 emotional and cognitive associations among different elements do not accurately represent  
867 reality and renders the individual dysfunctional and distressed. PE is designed to correct  
868 erroneous connections in the targeted memory structure. PTSD sufferers typically experience  
869 two key pathological emotional response sets and related cognitions: "The world is an utterly  
870 dangerous place," and "I am completely incompetent and unable to cope with stress." In this  
871 study, the 12-session protocol will be followed, but participants who improve more rapidly may  
872 finish in 10 sessions and those who improve more slowly may have up to 2 additional sessions  
873 to continue working on exposure. The procedure for determining number of sessions is  
874 described in **Section VIII.B.3**.

875 The central components of PE are in vivo and imaginal exposure. In vivo exposure consists of  
876 gradually and systematically having patients approach trauma-related situations, places, and  
877 people that elicit distress and have been avoided. Repeated exposure to these stimuli  
878 disconfirms the negative, unrealistic expectations of harm and the individual experiences a  
879 reduction in the associated fear response. Between sessions homework of in vivo exposure  
880 consists of systematically confronting trauma-related situations that are avoided and to remain  
881 in the situation until distress reduces by half. Imaginal exposure involves repeated revisiting of  
882 the memory in imagination and recounting aloud the traumatic event(s) in detail, while vividly  
883 imagining the event(s) and paying specific attention to emotions and thoughts that occurred at



884 the time of the event. Typically, as patients move through the imaginal exposure process, and  
885 distress reduces, they can focus on increasingly specific details of the event and integrate “new”  
886 information that had been overlooked due to longstanding habitual and willful avoidance of the  
887 memory. The revising and recounting of the traumatic event is followed by processing the  
888 revisiting experience. Processing provides an opportunity for patients to examine their beliefs  
889 related to the trauma memory, integrate the meaning of newly available information, and to gain  
890 a new perspective on the trauma, as well as to realize that they can handle successfully  
891 engaging with the traumatic memory rather than avoiding thinking about it. Similar to in vivo  
892 exposure, repeated and prolonged imaginal exposure provides experience that disconfirms  
893 negative erroneous cognitions (e.g., if I engage with the traumatic memory rather than avoid it I  
894 will “fall apart”) and reduces emotional distress associated with confronting the memory.  
895 Treatment sessions are audio-recorded and patients are asked to listen to their recounting of  
896 the trauma daily. Participants will give their consent to be audio-recorded during therapy for the  
897 purpose of imaginal exposure homework exercises . As this audio-recording is not analyzed  
898 data, but simply part of the usual and manualized PE treatment protocol, this audio-recording  
899 will not be behind VA firewall. Participants may borrow a tape recorder from their PE provider, or  
900 use their own audio recording device (e.g. cell phone) if they prefer. Psychoeducation and  
901 controlled breathing exercises play a secondary role in PE.

902 Psychoeducation comprises a discussion about what maintains PTSD, common reactions to  
903 trauma, and reasons why facing fears in a safe environment is therapeutic. Controlled breathing  
904 training is designed to impede the person’s sympathetic nervous system response by slowing  
905 down oxygen intake, it is a tool used early on in the treatment process to encourage self efficacy  
906 and mastery of symptoms.

907 Session 1 begins with an overview of the treatment program and a general rationale for how  
908 exposure works. The therapist gathers information using a standardized interview, focusing on  
909 the patient’s symptoms, details of the trauma, history of previous trauma, and social and  
910 occupational functioning. Breathing retraining is introduced and the patient practices slow and  
911 uniform breathing techniques. Homework is daily breathing exercises, auditing a recording of  
912 the session, and reviewing a “Rationale for Treatment” handout.

913 Session 2 focuses on education, treatment planning, and development of the in vivo exposure  
914 hierarchy. The therapist provides an explanation of PTSD, discusses common reactions to  
915 trauma, discusses a rationale for the treatment, and provides a description of each treatment

916 component. The use of Subjective Units of Distress (SUDS) ratings is explained. A list of  
917 avoided phobic situations is compiled, and an exposure hierarchy is developed. Homework  
918 includes practicing breathing exercises daily, listening to the recording of the session at least  
919 once, reviewing the list of avoided situations and adding items to the hierarchy if appropriate,  
920 reviewing a “Common Reactions to Trauma” handout daily, and in vivo exposure.

921 Session 3 reviews the rationale for PE and introduces prolonged imaginal exposure. The  
922 patient is to be guided through 60 minutes of imaginal reliving of the trauma. The patient is  
923 instructed to relive the trauma as vividly as possible, and to recount it aloud in the present  
924 tense. This procedure is repeated until the exposure period is expended. If the patient exhibits  
925 reluctance to engage fully in reliving the trauma, the therapist reiterates the rationale for the  
926 treatment and reminds the patient to confront the feared image gradually. SUDS ratings are  
927 obtained every 5 minutes and vividness, every 10 minutes. After the imaginal reliving, the  
928 patient is encouraged to talk about reactions to reliving the trauma and to discuss related  
929 thoughts and remembered details. The patient will learn to identify, evaluate, and modify  
930 disturbing thoughts and feelings, and develop more realistic beliefs about personal coping ability  
931 with stress and the dangerousness of the world. In vivo exercises are selected from the  
932 hierarchy and discussed for practice between sessions. Daily homework is to use the recording  
933 to relive the trauma, in vivo exposure, breathing practice, and to review the session recording.

934 Sessions 4 and up to the session before termination focus on imaginal in vivo exposure for 60  
935 minutes, followed by a discussion of the thoughts and feelings about the reliving. During  
936 imaginal exposure the therapist asks specific questions to clarify the patient's thoughts, feelings,  
937 and physical reactions while reliving the trauma to facilitate confrontation with fear-evoking  
938 cues. The parts of the scenario that are the most anxiety-producing to the patient are identified,  
939 and emphasized in repeated exposure. After each exposure the therapist and patient discuss  
940 reactions to the reliving, as in previous sessions. In vivo exercises are selected from the  
941 hierarchy for homework practice. As for previous sessions, daily homework is to use the  
942 recording to relive the trauma, in vivo exposures selected during session, breathing practice,  
943 and to review the session recording.

944 Last Session (Termination): Imaginal exposure lasts 30 minutes. The therapist and patient  
945 review treatment progress and discuss applications of treatment principles to daily life. This  
946 discussion will address the potential for temporary increases in PTSD symptoms, and how  
947 these can be managed.

948 **B. Cognitive Processing Therapy**

949 **Cognitive Processing Therapy** (Resick et al., 2010) consists of cognitive therapy and a written  
950 trauma narrative. Patients are taught to challenge their beliefs through Socratic questioning and  
951 the use of daily worksheets. The initial focus is on beliefs such as denial and self-blame, and  
952 then shifts to overgeneralized beliefs about self and the world. Patients process their trauma  
953 directly by writing a narrative of their traumatic event(s) that they read to themselves and to  
954 therapists. The typical protocol consists of 12 1-hr sessions. In this study, the 12-session  
955 protocol will be followed, but participants who improve more rapidly may finish in 10 sessions  
956 and those who improve more slowly may receive up to 2 additional sessions to continue working  
957 on stuck points with challenging beliefs worksheets. The procedure for determining number of  
958 sessions is described in **Section VIII.B.3**.

959 Session 1 consists of education about symptoms of PTSD and the recovery model of PTSD  
960 from a cognitive theory perspective. The therapist and patient determine the worst trauma (if  
961 different from that which was the focus of the CAPS) and the patient gives a brief description of  
962 the event. The therapist gives an overview of the therapy, explains what a stuck point is (a  
963 distorted cognition about one's role in the trauma, or implications about oneself, the world or  
964 other people) and gives the patient handouts to read as well as a stuck point log. Finally, the  
965 therapist explains the first practice assignment, to write an impact statement about the patient's  
966 beliefs about why the worst traumatic event occurred and how it has affected beliefs about self  
967 and others, particularly in the areas of safety, trust, power/control, esteem and intimacy.

968 Session 2: The patient reads the impact statement (or constructs it orally if the patient didn't do  
969 it). The therapist and patient move stuck points from the impact statement to the stuck point log  
970 as the therapist conducts gentle Socratic questioning about any erroneous self or other blame  
971 and has the patient label emotions they experience when they think the distorted thought. The  
972 next assignment is introduced: the ABC sheets on which the patient records events, thoughts,  
973 and feelings. The therapist uses examples from the impact statement to illustrate how the  
974 worksheets are used and how different thoughts lead to different emotions. Patients are  
975 assigned to complete one worksheet each day and at least one must be on the worst traumatic  
976 event.

977 Session 3: The therapist and patient review the ABC worksheets the patient completed and  
978 may complete others during the session. Gentle corrections may be made if the patient has  
979 difficulty identifying his/her thoughts or emotions and helping the patient construct stuck points

980 into a more easily challenged format (e.g., “if only I had done X, the event would not have  
981 happened”). The therapist uses Socratic questions to examine the evidence supporting or  
982 refuting the patient’s beliefs. The next assignment is for the patient to handwrite an account, at  
983 home, of the worst traumatic event. The patient is instructed to draw a line on the paper and  
984 stop briefly if he/she becomes very emotional. Also unlike PE, the account is written in the past  
985 tense and they may take more than one occasion to complete the assignment. The patient is  
986 asked to read the account to him or herself every day until the next session but this typically  
987 takes only a few minutes. They are asked to continue completing ABC sheets each day about  
988 items on the stuck point log or stuck points that emerge through the written account.

989 Sessions 4 and 5: The patient reads the account at the beginning of the session. The therapist  
990 does not interrupt the reading and sits quietly if the patient experiences emotions in the process  
991 of reading the account. When the patient has reoriented to the therapist, the therapist asks  
992 about emotions experienced at home while writing or reading the account, and in session and  
993 then asks about any parts of the event that may have been omitted or glossed over. The rest of  
994 the session is spent doing Socratic dialogue regarding any erroneous self or other blame,  
995 determining, who if anyone had intent to do harm (and therefore is the actual cause of the  
996 event). Hindsight bias, outcome based reasoning and mislabeling of guilt are all corrected  
997 through Socratic dialogue. The Just World myth may be reexplored. The patient is assigned to  
998 write the account a second time and notice any changes in emotions or beliefs. The patient  
999 continues to complete ABC worksheets. At session 5 the patient reads the new account and  
1000 Socratic dialogue continues. In the last third of the session, the therapist introduces the  
1001 challenging questions sheet in which the patient writes one of his/her stuck points at the top of  
1002 the page and asks him/herself a series of questions about the validity of the statement. At this  
1003 point the therapy begins to shift to teach the patient to challenge his/her own thinking. The  
1004 patient may be assigned to continue reading the account or to write an account about another  
1005 trauma.

1006 Session 6: The therapist and patient review the challenging questions worksheets and any  
1007 further work on accounts. The problematic thinking patterns worksheet is introduced and  
1008 examples are generated. In this worksheet, the patient is asked to notice stuck points and  
1009 everyday thoughts that are tendencies for them to engage in such as jumping to conclusions,  
1010 mindreading, emotional reasoning, or all or none thinking.

1011 Sessions 7-12: After reviewing the problematic thinking patterns, the final worksheet and first of  
1012 five themes is introduced. The Challenging Beliefs Worksheet compiles the content of all the  
1013 previous worksheets and adds a final column in which the patient generates a more balanced  
1014 and fact-based statement. The patient is asked to rate how much he or she believes this new  
1015 statement and how much they now believe the old stuck point. The patient is also asked to  
1016 name and rate the intensity of emotions before and after completing the worksheet. One theme  
1017 is explored each week in addition to the person's individual stuck points. Each of the themes,  
1018 safety, trust, power/control, esteem and intimacy can be self or other oriented. Three other  
1019 assignments are given in the last few sessions in addition to reading handouts on the themes  
1020 and completing worksheets. Patients are asked to practice giving and receiving compliments to  
1021 reengage with other people and to challenge their core beliefs and are asked to do at least one  
1022 pleasurable or worthwhile activity for themselves each day. This latter assignment is to help the  
1023 patient reestablish what they used to enjoy doing and to build self-worth. Either of these  
1024 assignments may trigger stuck points that can then be challenged. Behavioral activation can  
1025 serve as relapse prevention for depression as well. The final assignment before session 12 is  
1026 to rewrite the impact statement about how the patient now thinks about the causes of the  
1027 trauma.

1028 Session 12 begins with a review of the intimacy work sheets and then the patient reads the new  
1029 impact statement. The therapist reads the original statement and they compare the differences.  
1030 They also notice areas that the patient needs to continue to practice working on stuck points  
1031 and review the whole course of therapy.

## 1032 **VI. TREATMENT ASSIGNMENT**

### 1033 **A. Randomization**

1034 After the Site Coordinator has gone through the checklist to verify that the participant has signed  
1035 the informed consent form, met all the enrollment criteria, and completed the baseline  
1036 assessments, he/she can use the system established by the Palo Alto CSPCC to randomize the  
1037 participant. Participants will be randomly assigned in a 1:1 ratio to receiving PE or CPT.  
1038 Participant randomization will be based on permuted blocks within each study center. After the  
1039 participant is randomized, the Site Coordinator will obtain the treatment assignment and  
1040 complete the case report form (CRF) on randomization.

1041 **B. Blinding**

1042 Using the standard double-blinding procedures employed in medication research is not feasible  
1043 or desirable in psychotherapy research. Therapists need to be aware of which intervention they  
1044 are delivering, and participants need to know as well. Instead, the gold standard in  
1045 psychotherapy trials is to use blinded assessment, as described in **Section VIII.A.4**. Study staff  
1046 at each site will not be involved in the collection of the primary outcome data. Use of centralized  
1047 phone assessment for the primary outcome enhances blinding because assessors are not  
1048 physically located where participants are receiving treatment, which offers an additional layer of  
1049 protection from accidental unblinding. For secondary outcomes, the Site Coordinator will collect  
1050 participant self-reported questionnaires by providing folders containing the questionnaire  
1051 measures to participants and then collecting these folders from participants after completion  
1052 (**Section VIII.A.4**).

1053

1054

1055 **VII. MEASURES**

1056 The measurement protocol follows closely the protocols used in CSP #420 and #494. An  
1057 important difference in CSP #591 is that new diagnostic criteria for PTSD and other disorders  
1058 were implemented between submission of the proposal and the study's beginning. Members of  
1059 the study team were active participants in the revision of the PTSD criteria for DSM-5. Dr.  
1060 Friedman chaired the workgroup, with Drs. Schnurr and Resick as participants. A DSM-IV to  
1061 DSM-5 crosswalk study found that the new criteria applied well to both Veteran and non-  
1062 Veteran samples.

1063 The National Center for PTSD has revised and validated two key instruments, the CAPS and  
1064 the PCL, according to the new diagnostic criteria in DSM-5. Similarly, the PTSD Diagnostic  
1065 Scale (PDS; Foa et al., 1997) is being revised and validated for DSM-5. Below we describe the  
1066 existing measures but will use the new DSM-5 measures, noting important exceptions where  
1067 needed. Criteria for other disorders may change as well, so we propose to use the DSM-5  
1068 criteria for these disorders also.

1069 **A. Screening and Eligibility**

1070 The Clinician-Administered PTSD Scale (Weathers et al., 2001) is a clinician-administered  
1071 interview that measures diagnostic criteria for PTSD according to the American Psychological  
1072 Association's Diagnostic and Statistical Manual. The CAPS has excellent reliability and validity  
1073 and is the gold standard for PTSD treatment research (Weathers et al., 2001). Each of the 17  
1074 DSM-IV symptoms is rated on a 0-4 (low to high) scale for both frequency and intensity. In  
1075 DSM-5 these two rating scales will be combined into a single severity scale, which substantially  
1076 reduces the amount of time needed to administer the CAPS. This will facilitate telephone  
1077 administration.

1078 In DSM-IV, symptoms of PTSD are categorized into 3 clusters: 5 reexperiencing symptoms (B  
1079 Cluster), 7 avoidance and numbing symptoms (C Cluster); and 5 hyperarousal symptoms (D  
1080 cluster). In order to receive a diagnosis of PTSD (American Psychiatric Association, 1994), a  
1081 person must be exposed to a traumatic event; have 1 or more B symptoms, 3 or more C  
1082 symptoms, and 2 or more D symptoms; experience significant distress or impairment because  
1083 of the symptoms; and have symptoms for at least 30 days. Symptom severity is computed by  
1084 summing the totals for the 17 items.

1085 In CSP #494, diagnosis required that a participant meet DSM-IV diagnostic criteria (frequency  $\geq$   
1086 1 and intensity  $\geq$  2 for a symptom to be counted) and have a minimum level of severity (overall  
1087 severity  $\geq$  45). In DSM-5, the avoidance and numbing symptoms have been split into separate  
1088 clusters and additional symptoms have been added. In CSP #591 we will use the new  
1089 diagnostic criteria along with a severity score for entry that corresponds to a score of 45 on the  
1090 current DSM-IV version. Dr. Marx, who will oversee the telephone assessment procedures of  
1091 the study, is currently conducting a validation study (in collaboration with CAPS developer Dr.  
1092 Frank Weathers) that will allow us to identify the score that corresponds to a score of 45 on the  
1093 CAPS for DSM-IV.

1094 The CAPS includes a lifetime trauma checklist (the Life Events Checklist, or LEC) and questions  
1095 about stressor exposure, which will be used to ensure that participants meet the DSM-IV  
1096 criterion of stressor exposure that is required for diagnosis. The trauma checklist also will  
1097 provide descriptive information about participants at study entry. In addition, we will supplement  
1098 the interviewer questions about Criterion A exposure to permit categorization of trauma types  
1099 according to the categories developed by Stein et al. (2012): life threat to self, life threat to  
1100 others, aftermath of violence, traumatic loss, moral injury by self, and moral injury by others.

1101 The Structured Clinical Interview for DSM-IV (SCID), patient version (First et al., 2002),  
1102 assesses Axis I psychiatric disorders. It will be used during screening to establish exclusion  
1103 diagnoses; the data also will be used for sample description and for exploratory analysis to  
1104 examine non-PTSD psychiatric disorders as predictors of treatment outcome. It is arguably the  
1105 most widely used clinician-administered instrument for assessing psychiatric disorder. That  
1106 study estimated reliability to be good using a conservative method in which different clinicians  
1107 independently interview and rate the same participant; the overall weighted kappa was .61 for  
1108 current diagnosis and .68 for lifetime diagnosis. We will use the SCID for DSM-5. As in CSP  
1109 #420 and CSP #494, we will administer the modules for mood disorders, anxiety disorders  
1110 (other than PTSD), and substance abuse, along with the psychotic screen.

1111 Demographic information will be collected during screening, along with information about  
1112 cognitive impairment on the Montreal Cognitive Assessment (Nasreddine et al., 2005). We will  
1113 screen for history of traumatic brain injury and exposure to military sexual trauma using the  
1114 standard VA screening measures for these constructs and for suicidality using two items drawn  
1115 from the University of Washington Suicide Risk/Distress Assessment Protocol (Linehan,  
1116 Comtois, & Ward-Ciesielski, 2012); because there are no comparable measures of homicidality,



1117 we will modify the two suicide items to assess homicidality as well. The suicide screening  
1118 questions will be administered by the interview assessor at posttreatment and follow-up  
1119 interviews. Treatment preferences will be measured as in a recent study by Feeny et al. (2010),  
1120 in which participants are asked for a counterbalanced forced choice among treatment options  
1121 and then rate their confidence in their choice rating. We also will measure expectations and  
1122 treatment credibility for both treatments as in CSP #494 using the Expectancy of Therapeutic  
1123 Outcome Scale (Borkovec & Nau, 1972).

#### 1124 **B. Primary Outcome**

1125 Improvement in the CAPS PTSD severity score from baseline will serve as the primary  
1126 outcome.

#### 1127 **C. Secondary Outcomes**

1128 As in CSP #494, we will use the CAPS to compute additional measures of clinical outcomes:  
1129 response (defined as at least 10-point improvement in severity), loss of diagnosis (response  
1130 plus no longer meeting DSM symptom criteria), and remission (loss of diagnosis plus the DSM-5  
1131 score that corresponds to a DSM-IV severity score < 20).

1132 The PTSD Checklist (Weathers et al., 1993) is a brief questionnaire measure of PTSD symptom  
1133 severity that is widely used within and outside VA. In both PE and CPT, therapists administer  
1134 the PCL at the beginning of each session and review progress with participants during the  
1135 treatment. The scale consists of the 17 DSM-IV symptoms rated on a 1-5 scale of how much  
1136 that symptom bothered the individual in the prior month. The PCL is an efficient measure of  
1137 PTSD symptoms and has high sensitivity and specificity for a CAPS PTSD diagnosis. It has  
1138 excellent psychometric properties (Bliese et al., 2008) and is sensitive to treatment-related  
1139 change (Monson et al., 2008). At the beginning of the VA rollouts, therapists administered the  
1140 Beck Depression Inventory-II (BDI-II; Beck et al., 1996) in PE and CPT to monitor depression  
1141 symptoms. Therapists now administer the Patient Health Questionnaire-9 (PHQ-9; Kroenke et  
1142 al., 2001) instead. The PHQ-9 has been well-validated as a depression outcome measure (e.g.,  
1143 Lowe et al., 2004).

1144 However, because the unblinded therapists will administer the PCL and PHQ-9 as part of  
1145 treatment, it is important to use different measures of PTSD and depression symptoms as  
1146 outcomes. Having confronted a similar issue in a recent RCT of collaborative care for Veterans  
1147 with PTSD in which the treatment protocol required care managers to administer the PCL as

1148 part of care management (Schnurr et al., 2013), we turned to the PTSD Diagnostic Scale (Foa  
1149 et al., 1997) to measure PTSD. The PDS consists of the 17 DSM-IV symptoms of PTSD rated  
1150 on a 0-3 scale of how often the symptom has occurred in the past month. Like the PCL, it has  
1151 excellent psychometric properties (Foa et al., 1997; Griffin et al., 2004) and has been used in  
1152 many trials of treatments for PTSD (e.g., Ehlers et al., 2005; Foa et al., 2005; Foa et al., 1999;  
1153 Resick et al., 2008). Thus, we will use the DSM-5 version of the both the PDS and PCL.

1154 For similar reasons, we will use the BDI-II to measure depression during blinded assessment. It  
1155 has excellent psychometric properties and is widely used in PTSD treatment research (e.g., Foa  
1156 et al., 2005; Monson et al., 2012; Resick et al., 2002; Schnurr et al., 2007). Other secondary  
1157 outcomes include several brief questionnaires. Anger symptoms will be assessed with the State  
1158 Anger subscale of the State-Trait Anger Inventory (Spielberger, 1988). We will assess  
1159 substance abuse using the Short Inventory of Problems-Revised (SIP-R; Kiluk et al., 2012) and  
1160 selected items from the Brief Addiction Monitor (Cacciola et al., in press)—number of heavy  
1161 drinking days and number of drug use days)—chosen because of evidence that measures like  
1162 this are clinically sensitive endpoints (Falik et al., 2010). We also will assess functioning  
1163 (WHODAS-II; World Health Organization, 2000), quality of life (WHOQOL-BREF; World Health  
1164 Organization, 1996), and satisfaction (CSQ; Attkisson & Zwick, 1982).

1165 We will use a combination of self-report and VA administrative data to measure service  
1166 utilization. VA and Non-VA utilization will be measured using a brief questionnaire adapted from  
1167 one developed for the HSR&D-funded Barriers to Care Study (Vogt, ongoing). We will use VA  
1168 administrative databases to obtain information about VA-funded utilization. We will collect  
1169 information on individual PE and CPT sessions (based on the new session templates to be  
1170 launched in FY 2013), outpatient prescriptions, other outpatient services, and inpatient care  
1171 within all settings (acute, rehabilitation, and long-term care). We will use the Medical SAS  
1172 datasets (OPC for outpatient care, PTF for inpatient care) to capture all VA inpatient and  
1173 outpatient utilization. To obtain detailed information about non-study treatment before, during,  
1174 and after treatment, we will develop a questionnaire to measure types of psychosocial treatment  
1175 and medication use by adapting questionnaires used in CSP #494. At all NODES sites, and at  
1176 other study sites wishing to participate in collecting this information, we will additionally  
1177 administer Veteran Feedback Forms (VFFs) which are adapted from an Ohio State University  
1178 instrument [Miser], and intended to collect information about how participants heard about the  
1179 study, participants' motivations for joining the study, and participants' feedback on study  
1180 recruitment processes ("VFF Baseline", administered at Phase 2), and feedback regarding

1181 experience with being a research participant (“VFF Follow-up”, administered at the in-person 6-  
1182 month Post-treatment Assessment). Feedback responses will inform efforts to optimize  
1183 Veteran-centric recruitment in future studies.

1184

1185

1186 **VIII. STUDY PROCEDURES**

1187 We relied heavily on our experiences in CSP #420 and CSP #494 when designing the study  
1188 procedures, including the selection and timing of measures, methods of assessment, delivery of  
1189 treatment, and methods to ensure and monitor protocol fidelity. Modifications have been made  
1190 when necessary, e.g., to accommodate the centralized telephone assessment and the  
1191 possibility of additional treatment sessions, and also to enhance compatibility with other trials,  
1192 e.g., assessing the primary outcome at mid-treatment.

1193 We also utilized current experience in CSP #566 with procedures to facilitate telephone  
1194 assessments. We have recruited Dr. Brian Marx from the Behavioral Sciences Division of the  
1195 National Center for PTSD in Boston, who oversees the telephone assessment in CSP #566, to  
1196 help us design this part of the procedure for CSP #591. He has agreed to oversee telephone  
1197 assessment in CSP #591. The Behavioral Science Division is an ideal site to provide  
1198 leadership. The Division led the development of the CAPS and PCL, and is internationally  
1199 recognized for leadership in the assessment of PTSD. The division houses a number of  
1200 doctoral-level staff members who are experienced in administering the CAPS and SCID in  
1201 research protocols.

1202 **A. Assessment**

1203 *1. Schedule*

1204 The schedule of assessments is presented in **Table VIII.1**. The primary outcome, the CAPS,  
1205 will be administered via telephone before, during, and after treatment, and at 3- and 6-month  
1206 follow-up. In addition, the PCL and the PHQ-9 will be administered weekly during the course of  
1207 therapy as part of the treatment protocol. Participants' expectations and preference will be  
1208 measured at the beginning of treatment and treatment satisfaction will be collected at the end of  
1209 treatment only. Other secondary outcomes will be collected before and after treatment and at 3-  
1210 and 6-month follow-up, with the exception of utilization, which will be measured before and after  
1211 treatment and at 6-month follow-up.

**Table VIII.1. Assessment Schedule**

| Measure                           | Baseline | During treatment | Post-treatment | 3-months | 6-months |
|-----------------------------------|----------|------------------|----------------|----------|----------|
| Clinician-Administered PTSD Scale | X        | X (session #6)   | X              | X        | X        |
| Posttraumatic Diagnostic Scale    | X        |                  | X              | X        | X        |
| Beck Depression Inventory-II      | X        |                  | X              | X        | X        |

**Table VIII.1. Assessment Schedule**

| Measure                                                                   | Baseline           | During treatment | Post-treatment          | 3-months | 6-months                     |
|---------------------------------------------------------------------------|--------------------|------------------|-------------------------|----------|------------------------------|
| Spielberger State Anger Inventory                                         | X                  |                  | X                       | X        | X                            |
| Brief Addiction Monitor (2 items)                                         | X                  |                  | X                       | X        | X                            |
| Short Inventory of Problems-Revised                                       | X                  |                  | X                       | X        | X                            |
| WHO-DAS-II                                                                | X                  |                  | X                       | X        | X                            |
| WHOQOL-BREF                                                               | X                  |                  | X                       | X        | X                            |
| Client Satisfaction Questionnaire                                         |                    |                  | X                       |          |                              |
| Treatment preference                                                      | X                  |                  |                         |          |                              |
| Expectancy of Therapeutic Outcome                                         |                    | X (session #1)   |                         |          |                              |
| Utilization                                                               | X (6 months prior) |                  | X (time since baseline) |          | X (time since posttreatment) |
| Structured Clinical Interview for DSM-5                                   | X                  |                  |                         |          |                              |
| MoCA                                                                      | X                  |                  |                         |          |                              |
| Demographic information                                                   | X                  |                  |                         |          |                              |
| VA TBI Screen                                                             | X                  |                  |                         |          |                              |
| VA MST Screen                                                             | X                  |                  |                         |          |                              |
| Suicide Screen                                                            | X                  |                  | X                       | X        | X                            |
| Homicide Screen                                                           | X                  |                  |                         |          |                              |
| Life Events Checklist                                                     | X                  |                  |                         |          |                              |
| PTSD Checklist                                                            |                    | X (weekly)       |                         |          |                              |
| Patient Health Questionnaire-9                                            |                    | X (weekly)       |                         |          |                              |
| Veteran Feedback Form (VFF Baseline) (at NODES and selected other sites)  | X                  |                  |                         |          |                              |
| Veteran Feedback Form (VFF Follow-up) (at NODES and selected other sites) |                    |                  |                         |          | X                            |

1212

1213 **2. Telephone Assessment**

1214 Independent Assessors located at the Boston VA Medical Center will conduct the third phase of  
 1215 screening and perform all outcome assessments by telephone. Boston will conduct and  
 1216 oversee all aspects of the clinician-administered interviews performed in the study, including  
 1217 supervision and fidelity monitoring. Boston was chosen as the site given the extensive  
 1218 experience of Dr. Brian Marx and staff there in conducting telephone interviews in CSP #566  
 1219 and Project VALOR, a registry study of OEF/OIF/OND Veterans. The independent assessors  
 1220 are members of the research team and are VA or WOC employees.

1221 Although we considered conducting in-person interviews, we elected to conduct telephone  
 1222 interviews for several reasons. First, being able to complete the interviews by phone is  
 1223 convenient for participants because it prevents them from having to make an additional trip to  
 1224 the VA in order to be interviewed. Second, centralized assessment enhances quality control by  
 1225 reducing site-level variation in interview fidelity and quality. Third, the psychometric quality and

1226 acceptability to research participants of psychiatric phone interviews are now well-established in  
1227 Veteran (Aziz et al., 2004; Magruder et al., 2005; Schnurr et al., 2002) and non-Veteran (e.g.,  
1228 Rohde et al., 1997; Sartor et al., 2012; Shalev et al., 2012) samples. For example, Rohde et al.  
1229 (1997) found that the inter-rater reliability of phone interviews was excellent ( $\kappa = .96$  for  
1230 major depressive disorder and  $.87$  for anxiety disorders), exceeding the  $.80$  benchmark for  
1231 excellent reliability. Magruder et al. (2005), using the CAPS with a sample of Veterans seeking  
1232 VA care, found 100% agreement across interviewers. Fourth, because we are using separate  
1233 therapists to administer PE and CPT, centralized phone assessment assures that the person  
1234 who is collecting the primary outcome (the CAPS) will not see the therapist and participant  
1235 together, inadvertently breaking the blind. In summary, the phone interviews will provide a valid  
1236 method of assessing mental disorder constructs, yet be considerably more cost-effective and  
1237 more convenient for participants than in-person interviews.

1238 The Assessors will introduce the telephone interview portion of the study to the participant  
1239 informing the participant about the content of the interview and then reminding them that the  
1240 interview is being recorded. We will digitally record telephone assessments for the purposes of  
1241 checking interviewer reliability, following procedures used in CSP #566.

1242 All computers used for audio recordings will be VA-issued. Desktop computers will be  
1243 networked within the VA system and password-protected. Laptops will be VA-issued, encrypted,  
1244 password protected, and have VPN capabilities. Recorded files for CSP #591 will be saved  
1245 directly to a secured drive behind the VA firewall. As an additional security measure, recorded  
1246 files will be password protected.

### 1247 3. *Procedures to Enhance Completion of Assessment Protocols*

1248 A number of procedures will be used to minimize the likelihood that participants will fail to  
1249 complete the schedule of assessments. Detailed contact information will be obtained at study  
1250 entry to facilitate follow-up, even for participants who move. This information will be updated at  
1251 subsequent assessments. During treatment, the PCL and PHQ-9 questionnaires will be  
1252 administered prior to a treatment session. Interview assessments that include the primary  
1253 outcome will be conducted in telephone appointments scheduled for this purpose. Scheduling  
1254 will occur by phone when possible. Participants who do not have telephones will be contacted  
1255 by mail and asked to call the Site Coordinator to make an appointment to come in to the VA  
1256 Medical Center for the telephone interview or to make arrangements to use a phone elsewhere.  
1257 Five contact attempts including a final letter will be made before a participant is considered to be

1258 unreachable at that time point. Participants who fail to participate in a scheduled assessment  
1259 will be contacted by phone (or mail, when necessary) for rescheduling. After two missed  
1260 appointments without explanation, a participant will be considered to have missed that  
1261 assessment interval.

#### 1262 4. *Blinding*

1263 Assessors located at the Boston VA Medical Center who conduct the interviews will be blind to  
1264 a participant's treatment condition. Although the use of centralized telephone assessment can  
1265 help to minimize unblinding that may occur at the sites (e.g., by seeing a participant come out of  
1266 a given therapist's office), at each interview, the Assessor will remind the participant to not  
1267 reveal the treatment condition to which the participant has been assigned. After each follow-up  
1268 assessment, Assessors will indicate on the CRF if they become unblinded to a participant's  
1269 treatment assignment.

1270 Because Site Coordinators will deliver information about treatment assignment to participants,  
1271 we have taken different precautions to ensure the validity of the secondary questionnaire  
1272 assessments that will be collected by the Coordinators. The Site Coordinators will provide  
1273 folders containing the questionnaire measures to participants and then collect these folders from  
1274 participants after completion. Site Coordinators also will remind participants to not discuss their  
1275 treatment assignment during the visit. The Site Coordinators will remain available to answer  
1276 participant's questions but will not stay in the room with participants during questionnaire  
1277 completion in order to minimize contact with participants while the questionnaires are being  
1278 completed. However, Site Coordinators will check forms for completeness before a participant  
1279 leaves so that any missed items can be completed. It is preferred that the secondary  
1280 questionnaire assessments be completed by study participants in-person. However, it will be  
1281 acceptable for Site Coordinators to send and collect secondary questionnaire assessments by  
1282 mail for participants who are not able to attend an in-person visit (e.g., if the participant moved  
1283 away after completion of treatment). If an assessment needs to be completed by mail, the Site  
1284 Coordinator should contact the participant by phone and inform him/her that the assessment will  
1285 be mailed. If the Site Coordinator finds, upon receiving the mailed assessments, that the  
1286 participant endorses moderate or severe suicidal ideation, the Site Coordinator will inform the  
1287 Local Site Investigator or a study clinician. The clinician will follow the procedures outlined in the  
1288 CSP 591 high-risk protocol, and appropriate actions may include transferring the participant to  
1289 the Veterans Crisis Line with the VA Warm Transfer Protocol (2-800-273-TALK, PRESS 1).

1290

1291 5. *Reliability*

1292 All SCID and CAPS interviews will be digitally recorded. Approximately one hundred SCIDs and  
1293 200 CAPS (sampled equally from each of the 5 assessment periods) will be randomly selected  
1294 in an ongoing way in order to monitor and maintain the reliability of the interview process. An  
1295 Assessment Adherence Monitor, a doctoral-level clinical psychologist at the Behavioral Science  
1296 Division of the National Center for PTSD, will be employed to specifically conduct reliability  
1297 assessment under the supervision of Dr. Marx. In order to maintain reliability, the Monitor will  
1298 provide feedback to Assessors during biweekly supervision sessions that will continue  
1299 throughout the study period.

1300 Training for the Assessors will be standardized and systematically conducted by Dr. Marx. All  
1301 Assessors will have been required to have undergone formal training in the administration of the  
1302 SCID and CAPS, although training will be standardized nonetheless. Assessors will conduct  
1303 practice interviews during training at the study's kickoff meeting and then again upon return to  
1304 their performance site. They will continue to conduct practice interviews and receive feedback  
1305 from the Assessment Adherence Monitor until the Monitor judges them to be calibrated to a  
1306 standard of administration consonant with the intentions of the developers of the respective  
1307 interviews.

1308 6. *Compensation*

1309 **Table VIII.2** shows the estimated payment schedule. Assessments will be compensated at a  
1310 payment schedule designed to maximize retention by reflecting the additional effort that is  
1311 needed to continue to participate in assessments after study treatment has been completed.  
1312 Participants may find the continued assessment burdensome, so we propose to increase the 3-  
1313 and 6-month assessments by modest amounts in relation to the additional burden. The  
1314 maximum payment will be \$410. The questionnaire assessment during treatment is extremely  
1315 brief and will not be compensated because it is part of the standard of care. Payment for  
1316 screening and baseline assessment will be graduated. Participants who rule out of screening  
1317 based on the suicide screen or the MoCA will be paid \$30. Those who are eligible to continue  
1318 and complete the baseline questionnaires will receive an additional \$20. Participants will be  
1319 paid \$50 for completing the phone interview. Participants will also be reimbursed for travel over  
1320 50 miles.



1321 **Table VIII.2. Estimated Participant Payment Schedule for Study Assessments**

| 1322 | Assessment                   | Payment (\$) |
|------|------------------------------|--------------|
| 1323 | Screening/baseline/interview | 30/20/50     |
| 1324 | Mid-treatment                | 50           |
| 1325 | Posttreatment                | 75           |
| 1326 | 3-month follow-up            | 85           |
| 1327 | 6-month follow-up            | 100          |

1328 **B. Treatment**

1329 *1. Assignment*

1330 Participants will be randomly assigned to treatment following the completion of baseline  
1331 assessment measures that establish their eligibility for the trial.

1332 *2. Delivery*

1333 Both study treatments, which are summarized in **Section V**, will be delivered according to  
1334 standardized manuals. We will use the manuals and the therapist and patient materials  
1335 developed for the PE and CPT rollouts to administer the treatments. The manual for each  
1336 treatment is provided in Volume 2 of the study protocol. Treatment will be delivered in an  
1337 outpatient setting.

1338 PE and CPT will be administered approximately weekly, although sessions may be held more or  
1339 less frequently than once a week if needed, e.g., to accommodate a patient's scheduling needs  
1340 or to help a patient finish treatment within 20 weeks. For the sake of brevity, session frequency  
1341 is described as "weekly" throughout this protocol. The standard protocol for PE is 8-15 sessions  
1342 (10 sessions were used for PE in CSP #494), whereas the standard protocol for CPT is 12.  
1343 Given the flexibility in the number of sessions allowed according to the protocols in the VA  
1344 rollouts, it would be difficult to constrain the total number of sessions to 12 in CPT and 10 in PE.  
1345 Therefore, we propose to administer 12 sessions of each treatment as a standard "dose" but to  
1346 allow participants who improve more rapidly to finish in 10 or 11 sessions and participants who  
1347 have not attained adequate improvement by session 12 to have up to 2 additional sessions.

1348 Data from the rollouts suggests that this range will address the needs of most Veterans who  
1349 participate in the trial (**Table VIII.3**). The average number of sessions among treatment  
1350 completers is 11-12. There are not fixed criteria for determining completion in either rollout,  
1351 however. In PE, completion is defined as attending at least 8 sessions. In CPT, completion is

1352 based on improvement as determined by clinical judgment and decrease in PCL scores, which  
1353 is more comparable to what we propose to use.

1354 **Table VIII.3. Number of Sessions in Veterans Completing Treatment in the VA Rollouts**

|                              | N     | Mean (SD)    | < 10  | 10-14 | > 14  |
|------------------------------|-------|--------------|-------|-------|-------|
| Prolonged Exposure           | 1,723 | 11.09 (2.62) | 28.9% | 59.7% | 11.4% |
| Cognitive Processing Therapy | 689   | 11.83 (1.88) | 8.1%  | 87.0% | 4.9%  |

1355 We chose to standardize the number of sessions at 12 in both treatments based on the  
1356 available evidence showing that number of sessions is related to improvement in psychotherapy  
1357 (up to a point, at which a longer number of sessions is a reflection of nonresponse to treatment)  
1358 (e.g., Baldwin et al., 2009; Howard et al., 1986; Steenbarger, 1994). Almost none of the  
1359 literature on the dose-response relationship in psychotherapy discusses session length. In fact,  
1360 session length is hardly ever reported nor is it treated as a potentially influential variable. We  
1361 found no discussions or evidence relevant to our decision to equate number of sessions and not  
1362 total amount of treatment. We did find a small naturalistic study from the PTSD literature in  
1363 which investigators were required to shorten exposure sessions from 90 minutes to 60 minutes  
1364 during the course of a trial (van Minnen & Foa, 2006). The results suggested that total amount  
1365 of treatment did not matter. There were no differences between the 60 and 90 minutes groups  
1366 in PTSD and other outcomes. Although the study was not designed to examine session and  
1367 was not powered to detect anything other than large differences, the similarity of findings in both  
1368 groups was striking. However, we did not feel that this evidence was sufficient to support a  
1369 formal change in the PE protocol from 90 to 60 minutes.

1370 Our approach is an attempt to optimally balance standardization (to ensure internal validity) and  
1371 flexibility (to enhance generalizability). Although there are inherent differences in duration of  
1372 sessions in each treatment, we believe it is important to administer them in an ecologically valid  
1373 way—that is, to not artificially equate the duration of sessions. Because this is a comparative  
1374 effectiveness trial and not an efficacy study, we believe it is important to administer the  
1375 treatments as they would be used in practice. We will perform sensitivity analyses to examine  
1376 whether amount of treatment is differentially related to outcome.

1377 *3. Procedures for Early Completion and Additional Sessions*

1378 The standard number of sessions of PE and CPT will be 12. However, participants may  
1379 complete treatment with more or fewer sessions depending on their response to treatment.

1380 Therefore, in addition to reporting number of sessions attended in each condition, we will also  
1381 examine variability in early versus late completion in PE and CPT and explore how the variables  
1382 relate to outcomes.

1383 There are no standardized criteria for determining number of sessions for completion in the  
1384 rollouts, so we are proposing procedures based on experience in the rollouts as well as studies  
1385 that have used flexible dosing of manualized protocols for treating PTSD (Foa et al., 2005;  
1386 Galovski et al., 2012; Levitt et al., 2007). Our aim is to optimize standardization and flexibility by  
1387 ensuring that participants achieve substantial gains before terminating early (to ensure that they  
1388 are stably improved) and at the same time not requiring extra sessions unless participants have  
1389 failed to achieve an adequate response.

1390 Participants who have experienced stable remission before completing 12 sessions many  
1391 terminate early. Stable remission will be defined as 2 consecutive sessions in which the study  
1392 participant reports (the DSM-5 equivalent of) a PCL score below 29 according to DSM-IV  
1393 criteria. Beginning at session 8, participants who have a PCL below 29 for 2 consecutive  
1394 sessions may terminate treatment early and receive the final session content at the subsequent  
1395 session if they prefer to not complete all 12 sessions (i.e., in session 10 for someone remitted in  
1396 sessions 8 and 9 and session 11 for someone remitted in sessions 9 and 10). A score of 29  
1397 was chosen because it is the lowest possible score on the PCL that could meet the DSM-IV  
1398 symptom criteria for PTSD, and also corresponds to the definition of remission as a score below  
1399 20 on the CAPS (Weathers et al., 2001).

1400 Participants whose PCL scores have not dropped below 50 by session 12 may receive up to 2  
1401 additional sessions depending on their preference for more treatment. We considered a range  
1402 of scores between 40 and 50 as a threshold for determining whether participants would be  
1403 offered more sessions. A score of 45 is the average posttreatment PCL among completers in  
1404 the rollouts (**Section I.C.1, Table I.2**) and Monson et al.'s (2006) trial of CPT in Veterans; the  
1405 posttreatment average in CSP #494 was 42 at the end of 10 sessions. By using 50, we are  
1406 proposing a realistic threshold that is clinically meaningful and that many participants can attain  
1407 without the need for additional treatment. According to data from the CPT rollout, of the 519  
1408 participants who completed 12 or more sessions (a standard dose), 60.3% were at or under 49  
1409 on the PCL at session 12. Note that this does not mean that 40% of participants in CSP #591  
1410 would require extra sessions, because it does not take into account participants who completed

1411 in fewer than 12 sessions. What it does show is that the majority of participants who do not  
1412 complete before session 12 will not require additional treatment.

1413 It is common in psychotherapy trials for treatment to last more than the number of weekly  
1414 sessions due to missed appointments, vacations, and other scheduling difficulties. In CSP  
1415 #494, we attempted to have participants complete treatment within 16 weeks, although 20  
1416 weeks was allowed if there was consensus between the participant's therapist, supervisor, and  
1417 study leadership overseeing that treatment condition. However, although the standard dose will  
1418 be 12 sessions in CSP #591, we propose to attempt to have participants complete within 20  
1419 weeks because many participants are expected to finish in less than 12 sessions. If participants  
1420 do not complete treatment within 20 weeks, we will offer them 1-2 additional sessions, including  
1421 the termination session of their assigned treatment.

#### 1422 4. *Adjunctive Services and Attrition Prevention*

1423 We will add a maximum of 2 additional sessions to be used in the event of significant participant  
1424 crises or emergencies that present obstacles to study participation. These "stressor sessions"  
1425 will be allocated within the PE and CPT protocols according to a procedure described by  
1426 Galovski et al. (2012). We anticipate, however, that such sessions will be needed infrequently.  
1427 In a recent study that incorporated this procedure in CPT (Galovski et al., 2012), only 13 out of  
1428 100 participants required such a session, at a rate of one per participant.

1429 These sessions will be used to address significant psychosocial stressors or emergencies (such  
1430 as death in the family, diagnosis of life-threatening illness, notice of home foreclosure, sudden  
1431 loss of job with family needs dependent on income) that (a) occur during the course of  
1432 treatment, (b) cannot be integrated into the ongoing PE or CPT treatment, and (c) are deemed  
1433 likely to significantly interfere with a participant's ability to take part in PE or CPT if not  
1434 addressed in depth.

1435 If after a collaborative discussion with a participant a study therapist judges that a stressor  
1436 session is necessary, the therapist will offer the participant the option of skipping one session of  
1437 treatment in order to discuss and consider solutions for this stressor. Participants will be  
1438 informed that a maximum of two such special sessions will be available to them as part of the  
1439 study and that they can decide whether they need to use one of these extra sessions to discuss  
1440 the stressor or continue with the PE or CPT protocol as usual.

1441 The stressor session will focus on providing support, problem-solving the stressor situation,  
1442 and/or applying PE- or CPT-related intervention components to the issue at hand. Therapists  
1443 will be asked to ensure that they do not collude with avoidance by stopping the PE or CPT  
1444 protocol, while also respecting the need to attend to emerging crises. These procedures are  
1445 broadly consistent with usual practice in VA PTSD treatment. In the PE and CPT rollouts,  
1446 therapists are instructed to help their patients deal with such obstacles and remain flexible in  
1447 arranging additional help for their patients while still retaining components of the protocol that  
1448 are useful in addressing the crisis.

1449 Stressor sessions may occur current with, but outside of, study treatment. Alternatively, study  
1450 treatment may be stopped temporarily if this is necessary for the participant to address the  
1451 crisis. In the event that the therapist and participant decide that more than 2 sessions are  
1452 needed to attend to a crisis, then the participant will be removed from study treatment, but  
1453 allowed to resume therapy outside of the study if and when the participant chooses to do so.

1454 *5. Additional Procedures to Address Suicide Risk*

1455 Study therapists may learn of suicidal intent or ideation through the administration of the PHQ-9  
1456 at the beginning of each therapy session. If risk is indicated by the participant's responses to  
1457 Item 1.9 or by the study therapist's observations during the course of normal interactions with  
1458 the participant, a careful assessment guided by the study Suicide Assessment Procedures will  
1459 be triggered.

1460 If at any time a participant is found to be at risk for suicide and in need of intervention, the study  
1461 therapist will develop a safety plan with the participant. All suicide safety plans will be created  
1462 according to the standard procedures described in the VA manual, "Safety Plan Treatment  
1463 Manual to Reduce Suicide Risk: Veteran Version" (Stanley & Brown, 2008). This plan may  
1464 include support from the VA, family contacts and friends, and other people the participant trusts.  
1465 The safety plan will also incorporate the VA Veterans Crisis Line phone number: 1-800-273-  
1466 TALK (8255) as a support outlet. We will report these events as an AE if identified during the  
1467 course of treatment. Failure of the participant to comply with the safety plan will require stopping  
1468 study treatments and aggressively treating the suicidality.

1469 During phone interviews at posttreatment and follow-up, the telephone assessor will screen for  
1470 suicide risk using the protocol that is used for screening at enrollment. If responses indicate  
1471 significant risk, the telephone assessor will conduct a risk assessment. If the assessment

1472 indicates that the Veteran is at risk and in need of intervention, the assessor will actively  
1473 facilitate referral to a Veteran Crisis Line counselor using warm telephone transfer for high or  
1474 imminent risk Veterans. In addition, the assessor will contact the Site Coordinator and Local Site  
1475 Investigator to inform them about the participant. The Site Coordinator will contact the referring  
1476 VA clinician to ensure that participant and clinician work together to address any clinical need.  
1477 Any safety plan that has been created by the project-affiliated clinician will be communicated to  
1478 the referring VA clinician. The Assessor will contact the SI or referring clinician to refer  
1479 moderate and low risk Veterans for further follow-up. The SI will be responsible for ensuring  
1480 that necessary communications and procedures are followed for all study participants who are  
1481 judged to be a risk during assessments.

1482 All safety plans will be created according to the standard procedures described in the VA  
1483 manual, "Safety Plan Treatment Manual to Reduce Suicide Risk: Veteran Version" (Stanley &  
1484 Brown, 2008). This plan may include support from the VA, family contacts and friends, and other  
1485 people the participant trusts. All safety plans will also incorporate the VA Veteran Crisis Line  
1486 phone number: 1-800-273-TALK (8255) as a support outlet.

1487 All suicide attempts and completions will be considered SAEs, and as such, will be reported to  
1488 the study Executive Committee, Central IRB, and the DMC by the PI and Study Biostatistician,  
1489 in addition to other standard VA reporting requirements. The DMC will monitor all SAEs  
1490 regularly (at least every 6 months) throughout the study and assess potential for increased risks  
1491 to participants. The DMC may also impose requirements for more frequent monitoring of SAEs.

#### 1492 6. *Additional Treatment*

1493 As in CSP #420 and CSP #494, participants may receive some additional types of non-study  
1494 treatment while receiving study therapy. They are allowed to stay on medication, attend self-  
1495 help groups, and receive treatment for mental health problems other than PTSD. Participants  
1496 who have a usual therapist also are allowed to see the therapist for brief supportive sessions if  
1497 necessary. In addition, participants who develop problems requiring additional inpatient or  
1498 outpatient treatment will be allowed to receive the additional treatment. They may stay enrolled  
1499 in study treatment if this would be clinically appropriate, as determined by discussion involving  
1500 the therapist, the therapist's study supervisor, and the Local Site Investigator. After completing  
1501 treatment, participants will be allowed to resume any PTSD treatment that was discontinued or  
1502 to seek additional treatment for PTSD. We will use a specifically detailed measure to assess

1503 medication use during treatment that was developed for CSP #494, expanding the measure to  
1504 capture psychotherapy.

1505 Based on our prior experience, the majority of participants will be on some kind of medication  
1506 and the clinicians prescribing the medication may wish to change drugs or dose while the  
1507 participant is receiving study treatment. In CSP #494, this happened more in the comparison  
1508 group than in the PE group, we suspect, because clinicians were attempting to compensate for  
1509 participants' assignment to the comparison group. Our approach in both CSP #420 and CSP  
1510 #494 was to try to discourage unnecessary medication changes but to respect participant  
1511 preferences. Medication changes were handled at the site level by individual clinicians,  
1512 sometimes with the involvement of the LSI.

1513 In CSP #591 we will offer consultation to study therapists or prescribing clinicians on best  
1514 practices in medication management. Dr. Friedman will perform this function by serving as the  
1515 Medication Monitor, utilizing his experience providing similar consultation through VA's National  
1516 PTSD Consultation Program. The goal is not to prevent clinicians from doing what they feel is  
1517 in the best interests of participants, but rather, to standardize insofar as possible the use of  
1518 medications across participants and sites and discourage ineffective or potentially harmful  
1519 prescribing practices. We will use a blinded consult request form (modeled after the form  
1520 currently used in the PTSD Consultation Program) so that Dr. Friedman can remain blind to a  
1521 participant's assigned treatment condition during these consults. Clinicians also will be  
1522 reminded to not discuss participants' treatment assignment with Dr. Friedman during any  
1523 discussions that follow.

### 1524 **C. Discontinuation of Study Treatment**

1525 Experience with PE and CPT in the rollouts indicates that some participants will have temporary  
1526 disruptions of study treatment due to other comorbid problems or life events, but that  
1527 participants typically can come back into treatment after being stabilized. However, participants  
1528 will be discontinued from treatment if they show substantial worsening of PTSD, other  
1529 symptoms, or functioning requiring lengthy hospitalization or if the worsening is due to  
1530 treatment. For intent-to-treat purposes, all participants, including those who are terminated from  
1531 treatment early, will be followed at posttreatment and at 3 and 6 months.

1532 Participants can be identified for discontinuation from treatment by their therapist or their non-  
1533 study clinician (if they have one). When a participant is identified as requiring discontinuation

1534 for any of the reasons listed above, the individual who has made the recommendation for  
1535 discontinuation will communicate with the other clinicians involved in the care of that participant,  
1536 as well as with the LSI. The LSI will call a meeting as soon as possible to discuss this issue  
1537 with all involved parties. If the discussion at this meeting confirms that the participant should be  
1538 discontinued for any of the reasons, the LSI will communicate with the Master Therapist (Dr.  
1539 Foa for PE and Dr. Resick for CPT) and Supervisor for that participant's assigned condition in  
1540 order to obtain official study permission to discontinue treatment. Then, in conjunction with the  
1541 appropriate clinicians, the PI will decide what method will be the most clinically sensitive mode  
1542 for communicating the study team's decision.

#### 1543 **D. Withdrawals**

1544 Participants may withdraw from study treatment or from the study at any time. Those who  
1545 withdraw from study treatment but wish to continue in the study will participate in study  
1546 assessments according to the protocol. Those who withdraw consent will not be followed.

1547 If a participant withdraws from the study (or is declared lost to follow-up), the participant may be  
1548 re-consented and complete his or her participation in study treatment and/or study  
1549 assessments.

#### 1550 **E. Post Follow-up Procedures**

1551 After completing study treatment and follow-up, participants will not be followed. They may  
1552 continue any ongoing treatment or initiate new treatment for PTSD.

#### 1553 **F. Training and Supervision**

1554 Therapists will be chosen from among those who have completed the full training for either PE  
1555 or CPT and are registered on VA rosters as providers of one of those therapies; this requires  
1556 comprehensive review of training cases. Study training, aside from specific instruction  
1557 regarding the protocol and documentation, will consist of a 1-day review of the therapy protocols  
1558 to ensure that the therapists are implementing the therapy uniformly. To establish therapist  
1559 proficiency, potential study therapists will be asked to submit two audio-recorded treatment  
1560 sessions prior to selection. These sessions will be reviewed by a senior clinician who is  
1561 approved to provide case consultation in the VA rollouts in order to establish adherence and  
1562 competence with the treatments.

1563 Therapy Supervisors, two for PE and two for CPT, will be selected to train and consult with



1564 study therapists throughout the course of the study. The Therapy Supervisors will provide case  
1565 consultation in weekly group conference calls with no more than 8 therapists per call. The  
1566 consultation will focus on problem-solving and other issues that arise in the course of delivering  
1567 the study treatments. Review of audio recordings of therapy sessions will not be necessary for  
1568 supervision because therapists will be required to have completed all VA provider training  
1569 elements and review of audio recordings will be necessary to confirm therapists' proficiency  
1570 before entry into the trial. However, therapists will be asked to audio-record every session for  
1571 quality control. If there are concerns about a therapist or if a therapist requests more intensive  
1572 consultation, one of the Master Therapists will review audio recordings and provide more  
1573 specific feedback to address the problem.

#### 1574 **G. Therapy Fidelity Monitoring**

1575 Monitoring of therapist behavior and interventions in both treatment conditions is necessary to  
1576 ensure treatment fidelity, i.e., that therapists are delivering the interventions specified in the  
1577 manual and not using interventions that are not part of the treatment. Independent monitoring  
1578 will provide a detailed assessment of adherence to the manuals and therapist competence.  
1579 Using procedures developed in our prior studies (CSP #420 and #494), an independent Fidelity  
1580 Monitor (a senior clinician who is not involved in training or consultation in the study), will rate  
1581 two audio recordings from each study therapist for adherence and competence.

1582

1583 **IX. DATA COLLECTION AND MANAGEMENT**

1584 **A. Data Management**

1585 The Palo Alto CSPCC will be responsible for the management and the quality control of the  
1586 data. After the study is approved, data forms will be finalized and field tested. An Operations  
1587 Manual will be provided to the investigators to guide the operation and management of the  
1588 study. A training session at the kickoff meeting is planned prior to the initiation of participant  
1589 enrollment for all study personnel to assure uniformity in participant management and data  
1590 collection procedures, and to train all study personnel in study procedures. The Study  
1591 Coordinator at each medical center and the Independent Assessors at the Boston VA Medical  
1592 Center will complete data forms on a daily basis and transmit them to the CSPCC. If paper  
1593 forms are used, the original forms will be kept in the LSI's study files.

1594 DataFax, a clinical trial data management system (by Clinical DataFax Systems, Inc.), will be  
1595 used for data collection and management. DataFax allows for paper data form collection as  
1596 well as electronic data capture (EDC). The Study Coordinators from the sites and the  
1597 Independent Assessors will complete case report forms (CRFs) and fax them directly to the  
1598 DataFax computer server, where data images of the CRFs are stored as files. The system uses  
1599 an optical character recognition (OCR) paradigm to automatically process and store the  
1600 information from the image as data into the study database. The original fax image is also  
1601 stored. Data management staff at CSPCC will review each CRF by comparing the faxed image  
1602 with the OCR data and ensure that the two match. If electronic CRFs are used, the Study  
1603 Coordinators and the Independent Assessors will log into the web-based DataFax system and  
1604 enter study data directly, rather than completing and sending a paper CRF.

1605 In the case of the Veteran Feedback Forms, since Veterans will have the option of hand-writing  
1606 responses to open-ended questions, the SC will scan the form and load it directly onto the  
1607 CSPCC secure server, in a site-specific folder. The original scanned image will be stored, and  
1608 manual data entry will be used for both quantitative and qualitative responses.

1609 Data management staff at CSPCC will review CRFs for protocol adherence data consistency,  
1610 and add data queries to items that fail these checks. Checks will be performed manually and  
1611 programmatically. On a regular basis, data management staff will produce site-specific Quality  
1612 Control reports that list all unresolved data queries. Data management staff will make the  
1613 reports available to each site and work with the Study Coordinators and the Independent

1614 Assessors to help them resolve queries. Queries will be resolved when the appropriate  
1615 corrections to the CRF are made and data resent, or when an explanation is provided that  
1616 allows for data management staff to resolve the query. All corrections and changes to the data  
1617 will be reviewed by data management staff. In addition to the Quality Control report, CSPCC  
1618 may generate and distribute targeted data edit reports on an as needed basis.

1619 The Study Co-Chairs, the Study Coordinators and the Independent Assessors will receive  
1620 periodic reports regarding the quality and quantity of data submitted to the CSPCC. Other  
1621 quality control measures include periodic reports containing participant recruitment information  
1622 and relevant medical data for review by the Study Co-Chairs. The CSPCC will also prepare  
1623 summary reports for the Study Co-Chairs, the Data Monitoring Committee, and other monitoring  
1624 groups of the data to track progress, and conduct final analyses of the study data.

1625 Study reports will be generated using DataFAX, SAS, Atlas.ti (for qualitative data analyses), and  
1626 other tools (e.g., Microsoft Excel and Access). SAS and other statistical software packages will  
1627 be used to conduct data analysis for the study. The CSPCC was using SAS Version 9.1 in  
1628 October 2012 and will upgrade to newer versions once they are purchased and validated.

## 1629 **B. Data Security**

1630 The DataFAX system is fully compliant with US Federal regulations regarding electronic data  
1631 capture systems established by the Food and Drug Administration under 21 CFR 11. Data  
1632 entered directly into the database provides the official clinical record for data collection. Source  
1633 documentation is handled in the same manner as a paper-based system. All paper-based  
1634 records will be kept in locked file cabinets at the sites and Boston VA Medical Center. The  
1635 servers housing the study databases will be located at a secure VA facility and housed behind  
1636 the VA firewall on VA-owned and -maintained servers. The system will be monitored to ensure  
1637 that all applicable VA regulations and directives are strictly followed.

1638 Access to the study data is restricted by the CSPCC to properly-credentialed research staff who  
1639 have completed required VA security trainings. Only CSP-approved individuals (such as: staff  
1640 at the study site, CSPCC, and CSP Clinical Research Pharmacy Coordinating Center  
1641 (CSPCRPCC)) will have access to the personal health information (PHI) of study participants.

1642 Research data will only be stored on secure VA servers within the VA firewall (and not on  
1643 desktops or on University affiliate servers). The data will be coded with a unique study identifier  
1644 for each participant and stored using that study identifier. Identifiable information will be

1645 collected for participant tracking and safety purposes, and to collect health care usage data.  
1646 Coded clinical data will be stored separately from the participant's name, contact information,  
1647 and real SSN. Access to the cross-walk file linking the participant's identifiers and their study  
1648 data will be restricted to the clinical site and to the study staff at the CSPCC.

1649 In case of improper use or disclosure of study data, the facility's ISO and Privacy Officer, and  
1650 the individual's direct supervisor will be notified immediately per VA Directive and Handbook  
1651 6500. Records will be maintained and destroyed per the VHA Records Control Schedule (RCS  
1652 10-1).

1653 Quality control checks and clinical monitoring will enable the CSPCC to examine the database  
1654 and the clinical sites to ensure data have not been improperly used or accessed. Audit trails and  
1655 access logs compliant with 21 CFR part 11 will be checked routinely, and clinical monitors will  
1656 provide continuing education on GCP and check clinical site operations for violations of data  
1657 security policies and best practices.

1658 **C. Proposed Data Collection Forms**

1659 Copies of the proposed data collection forms can be found in **Appendix C**.

1660

1661

1662 **X. BIostatistical Considerations**

1663 **A. Expected Treatment Effect**

1664 This study is a prospective randomized clinical trial aimed to compare the effectiveness of  
1665 Prolonged Exposure (PE) to Cognitive Processing Therapy (CPT) for the treatment of PTSD in  
1666 veterans. The primary outcome is the change of CAPS total score from baseline (pre-  
1667 treatment) to the average in the six months post-treatment (measured at immediate post-  
1668 treatment, 3 and 6 months follow-up visits). We chose to use the average in the six months  
1669 post-treatment in the definition of primary outcome (versus using a single post-treatment  
1670 timepoint) because we anticipate that improvement established during the course of treatment  
1671 will be sustained in the 6 months after treatment for both PE and CPT. Incorporating multiple  
1672 measurements from the same participant will also reduce the required sample size. The  
1673 Planning Committee considered an effect size of 0.25 to be a clinically meaningful difference,  
1674 where the effect size is defined as  $\Delta\mu/\eta$ ,  $\Delta\mu$  is the mean difference in the primary outcome  
1675 between PE and CPT, and  $\eta$  is the standard deviation of the change of CAPS total score from  
1676 baseline to a specific post-treatment timepoint. By using CSP #494's estimated standard  
1677 deviation  $\eta=19.6$ , the effect size of 0.25 translates to a  $\Delta\mu=4.9$  points difference in the primary  
1678 outcome. For simplicity, the sample size for this study is aimed to have 90% power to detect  
1679  $\Delta\mu=5$  in the primary outcome.

1680 Cohen (1988) defined 0.25 as a small effect. We have powered the study to detect this  
1681 difference because both PE and CPT are effective treatments. It is implausible based on  
1682 existing data to think that the true difference between them is much larger. Conversely, if we  
1683 did not have adequate power to detect a difference as small as 0.25, then any failure to find a  
1684 difference between treatments could be seen as inconclusive—which was the problem with the  
1685 only study that directly compared the treatments (Resick et al., 2002). If the true difference  
1686 between the effects of PE and CPT is less than 0.25, this would be clinically insignificant.

1687 Although our sample size calculation is based on DSM-IV CAPS total score data observed in  
1688 the CSP#494, the effect size of 0.25 is independent of DSM versions. In addition, a correlation  
1689 coefficient among participants treated by the same therapist is a robust statistics for both  
1690 location and scale change of CAPS total scores. We expect a negligible difference in inflation  
1691 factors between DSM versions. Therefore, the sample size derived below is appropriate for  
1692 CAPS on DSM-5 .

1693 **B. Sample Size and Power Considerations**

1694 1. *Planned primary analysis for the primary outcome*

1695 Linear mixed effects models (SAS PROC MIXED) will be used to compare the primary outcome  
1696 between the two treatment groups. The mixed effects model will include time, treatment,  
1697 treatment by time interaction and site as fixed effects, and participant and therapist as random  
1698 effects. Specifically let  $Y_{ijk}$  denote the CAPS total score measured at timepoint  $k$  for the  $j^{\text{th}}$   
1699 participant treated by therapist  $i$ . The mixed effects model for the primary analysis is:

1700 
$$Y_{ijk} = \alpha + \beta_k + \gamma_{z(i)} + (\beta\gamma)_{kz(i)} + \theta^T w_{ij} + u_i 1_{\{k \neq 0\}} + b_{ij} + \varepsilon_{ijk},$$

1701 where  $i = 1, \dots, I, j = 1, \dots, J_i, k = 0, 1, 2, 3$  with  $k = 0$  indicating baseline and  $k = 1, 2, 3$  indicating  
1702 the three post-treatment timepoints,  $z(i)$  is the treatment that participant  $j$  treated by therapist  $i$   
1703 is randomized to,  $\beta_k$  is the time effect (fixed),  $\gamma_{z(i)}$  is the treatment effect (fixed),  $(\beta\gamma)_{kz(i)}$  is the  
1704 time by treatment interaction (fixed),  $w_{ij}$  denotes the vector of other covariates in the model  
1705 (such as site or key baseline characteristics) and  $\theta$  is the associated regression parameter,  $u_i$  is  
1706 the random therapist effect for therapist  $i$ ,  $1_{\{k \neq 0\}}$  is the indicator for  $k$  not equal to zero,  $b_{ij}$  is the  
1707 random participant effect for participant  $j$  treated by therapist  $i$ ,  $\varepsilon_{ijk}$  is the random error at the  
1708  $k^{\text{th}}$  timepoint for participant  $j$  treated by therapist  $i$ . While other covariance structures will be  
1709 used to assess their impact on study results, for simplicity and ease of interpretation we assume  
1710 in the primary analysis that  $u_i$ ,  $b_{ij}$  and  $\varepsilon_{ijk}$  are independent and have the following distributions:

1711 
$$u_i \sim N(0, \sigma_P^2), b_{ij} \sim N(0, \sigma_{BS}^2), \varepsilon_{ijk} \sim N(0, \sigma_{WS}^2).$$

1712 Under this mixed effects model, the variance of CAPS total score at timepoint  $k$  is

$$\text{Var}(Y_{ijk}) = \sigma^2 = \sigma_P^2 1_{\{k \neq 0\}} + \sigma_{BS}^2 + \sigma_{WS}^2$$

1713 Note that we allow the improvement in CAPS total score to vary at these three post-treatment  
1714 timepoints in the mixed effects model; the contrast or estimate statement in SAS will be used to  
1715 estimate and compare the primary outcome between PE and CPT. Although we anticipate the  
1716 improvement in CAPS total score established in the treatment course will sustain for 6 months  
1717 for both PE and CPT, this more flexible model allows the possibility of worsening PTSD  
1718 symptoms after study treatment is discontinued and the possibility of improving PTSD  
1719 symptoms if participants initiate other PTSD treatments post study treatment.

1720 2. *Sample size ignoring therapist effect*

1721 For an individual participant with CAPS total score measured at pre-treatment and at  $t$  post-  
1722 treatment timepoints, the variance of the primary outcome for this participant is

$$\tau^2 = \sigma_p^2 + \frac{\sigma_{WS}^2}{t} + \sigma_{WS}^2,$$

1723 where  $\sigma_p^2$  is the variance of the therapist random effect and  $\sigma_{WS}^2$  is the within-subject variation of  
1724 the CAPS total score. Under the simplified assumptions that all study participants have CAPS  
1725 total score measured at pre-treatment and at  $t$  post-treatment timepoints and that each study  
1726 participant is treated by a different therapist, the sample size per treatment group needed to  
1727 achieve power  $1-\beta$  to detect a mean difference of  $\Delta\mu$  between PE and CPT in the primary  
1728 outcome, using a two-sided t-test with two-sided significance level  $\alpha$  is:

$$n = \frac{2(z_{1-\alpha/2} + z_{1-\beta})^2}{(\Delta\mu/\tau)^2}$$

1729 The estimated variance components from CSP #494 are  $\sigma^2 = 678$ ,  $\sigma_p^2 = 36$ ,  $\sigma_{BS}^2 = 504$ ,  $\sigma_{WS}^2 =$   
1730 174, and thus  $\tau = 16.4$  when  $t=3$  and  $\tau = 17.2$  when  $t = 2$ . Therefore if we assume all  
1731 participants have complete follow-up CAPS total score ( $t = 3$ ), it requires a total of 452  
1732 participants (226 per group) to have 90% power to detect a difference of  $\Delta\mu = 5$  between PE  
1733 and CPT in the primary outcome. If each participant has only 2 post-treatment CAPS total  
1734 scores ( $t = 2$ ), it requires 498 participants (249 per group) to have 90% power.

1735 3. *Adjusting for correlations due to therapist*

1736 In this study, each therapist will deliver either PE or CPT to a number of study participants.  
1737 Although the treatment will be delivered on an individual basis, observations from the  
1738 participants treated by the same therapist are likely to be correlated. Assuming each therapist  
1739 treats  $m$  study participants, the sample size obtained under the independent participants  
1740 assumption (in **Section X.B.2**) needs to be inflated by the following inflation factor  $f$  to retain the  
1741 same power (Campbell et al., 2007; Machin et al., 2009):

$$f = 1 + (m - 1)\rho,$$

1742 where  $\rho$  is the intraclass correlation due to therapist, or equivalently the correlation between the  
 1743 primary outcomes from two individuals receiving treatment from the therapist. When each of  
 1744 these two individuals has  $t$  post-treatment measurements,  $\rho$  can be expressed as

$$\rho = \frac{\sigma_p^2}{\tau^2} = \frac{\sigma_p^2}{\sigma_p^2 + \frac{\sigma_{WS}^2}{t} + \sigma_{WS}^2}$$

1745 Using the variance estimates from CSP #494,  $\rho = 0.134$  when  $t = 3$ . The Planning Committee  
 1746 determined that it is reasonable to assume each therapist will deliver either PE or CPT to eight  
 1747 participants over the course of the study ( $m = 8$ ). It follows that  $f = 1+(8-1)*0.134 = 1.94$ . Hence  
 1748 a total of 878 participants (439 per group) is needed to provide 90% power to detect  $\Delta\mu = 5$  in  
 1749 the primary outcome (assuming each participant has baseline CAPS total score and complete  
 1750 follow-up CAPS total score at immediate post-treatment and at 3 and 6 months post treatment)  
 1751 as shown in **Table X.1** below.

1752 **Table X.1 Total sample size needed for a range of parameter values.**

| $\Delta\mu$ | t | $\tau$ | $\Delta\mu/\tau$ | $\rho$ | f    | Power |      |
|-------------|---|--------|------------------|--------|------|-------|------|
|             |   |        |                  |        |      | 85%   | 90%  |
| 5           | 3 | 16.4   | 0.30             | 0.13   | 1.94 | 750   | 878  |
| 5           | 2 | 17.2   | 0.29             | 0.12   | 1.85 | 788   | 920  |
| 5           | 1 | 19.6   | 0.26             | 0.09   | 1.66 | 916   | 1072 |

1753

1754 We anticipate some participants may not have complete follow-up CAPS total scores at the  
 1755 three post-treatment timepoints. If each participant has  $t = 2$  follow-up CAPS total score  
 1756 (instead of 3), then  $\rho = 0.121$ ,  $f = 1.85$ , and it requires a total of 920 participants (460 per group)  
 1757 to provide 90% power to detect  $\Delta\mu=5$  in the primary outcome, using the same values of  
 1758 variance components as above. In CSP #494, about 75% of participants had all follow-up  
 1759 CAPS total scores, and the average number of follow-up CAPS total scores is 2.45. In this  
 1760 study we expect a higher proportion of participants to have complete follow-up CAPS total score  
 1761 because CAPS assessment will be conducted over telephone, not requiring a clinical visit from  
 1762 the participant. To protect against missing CAPs total scores, potential deviations of the various  
 1763 variances from the assumed values and possible deviation that some therapists will treat more  
 1764 than 8 participants, we plan to randomize 900 participants in this study (450 per group). See



1765 **Table X.2** for the power of the study (with sample size of 900) to detect  $\Delta\mu= 5$  or 4 for a range  
 1766 of  $\tau$  and  $\rho$  values (the number of participants treated by each therapist is fixed at 8).

1767 **Table X.2 Power of the study to detect for  $\Delta\mu=5$  or 4 for various vales of  $\tau$  and  $\rho$ .**

| $\Delta\mu$ | $\rho$ | $\tau=16$ | $\tau=17$ | $\tau=18$ | $\tau=19$ | $\tau=20$ |
|-------------|--------|-----------|-----------|-----------|-----------|-----------|
| 5           | 0.100  | 95%       | 92%       | 89%       | 86%       | 82%       |
|             | 0.120  | 93%       | 90%       | 87%       | 83%       | 79%       |
|             | 0.134  | 92%       | 89%       | 85%       | 81%       | 77%       |
|             | 0.150  | 91%       | 87%       | 83%       | 79%       | 74%       |
| 4           | 0.100  | 82%       | 77%       | 72%       | 68%       | 63%       |
|             | 0.120  | 79%       | 74%       | 69%       | 64%       | 60%       |
|             | 0.134  | 77%       | 72%       | 67%       | 62%       | 58%       |
|             | 0.150  | 74%       | 69%       | 64%       | 60%       | 55%       |

1768

1769 **4. Alternative derivation**

1770 We have also derived sample size inflation factor for more general scenarios that allow  
 1771 therapists to treat different numbers of participants and participants to have different numbers of  
 1772 post-treatment CAPS total scores. This sample size inflation factor is calculated by considering  
 1773 the ratio of the variance of the mean change from baseline under the mixed effect model to the  
 1774 variance of the mean change from baseline under the independent observations assumption, in  
 1775 which the mean change from baseline is computed over all individual changes from baseline at  
 1776 all post-treatment points from all participants. While we skip the derivation formula and results  
 1777 here, in the special case that each therapist treats an equal number of participants and each  
 1778 participant has the same number of post-treatment CAPS total score assessed at the same  
 1779 timepoints, the sample size formula reduces to that in the previous subsection.

1780 **C. Number of Participating Sites and Duration of Study**

1781 We will select sites that have high patient volume and at least 8 trained therapists (4 PE and 4  
 1782 CPT) to deliver study treatments. Sites with research infrastructure and research experience  
 1783 are also preferred. Each participating site is expected to randomize 64 participants over the  
 1784 course of the study (8 therapists each treating 8 participants). Therefore, 14.1 sites are needed  
 1785 to achieve the target total randomization of 900. Because some participants are found to be  
 1786 ineligible for the study after signing consent (i.e. during Phase 2 or Phase 3 Screening  
 1787 procedures), the total number of enrolled (i.e. consented) participants in the study may be as  
 1788 high as 2550 (150 per site) to reach the randomization goal of 900.

1789 As mentioned in **Section I.E**, at present 75 sites meet the criterion of having at least 4  
1790 therapists who are proficient in PE and 4 who are proficient in CPT, and more sites are  
1791 expected to qualify as the rollouts continue. **Table I.4** of **Section I.E** shows that many of these  
1792 qualifying sites have more than 1500 unique PTSD outpatients in FY 2011. We anticipate a  
1793 large proportion of these PTSD outpatients will be eligible for the current study because our  
1794 inclusion and exclusion criteria are nonrestrictive. Even if only 5% of these patients are  
1795 enrolled, a site with at least 512 PTSD patients should be able to randomize 64 patients over a  
1796 2.5-year period. We plan to recruit at 17 participating centers at the beginning of the study in  
1797 case one or more centers have to be terminated.

1798 Each participant will be treated and followed for up to 12 months and, therefore, the total  
1799 duration of active recruitment, treatment and follow-up is 3.5 years. Start-up and closeout at  
1800 each VA medical center will both last for 3 months. Start-up and closeout for the Study Chairs'  
1801 Office, Palo Alto CSPCC and CRPCC at Albuquerque will be 6 months and 3 months,  
1802 respectively. The Chairs' Office, CSPCC and CRPCC will require 12 months for final statistical  
1803 analysis.

#### 1804 **D. Final Statistical Analysis**

##### 1805 *1. Baseline comparability*

1806 Because of the large sample size of this study, we expect the randomization process to balance  
1807 baseline characteristics and produce comparable groups of participants. Baseline comparability  
1808 between treatment groups will be evaluated with respect to demographic and baseline physical  
1809 and psychological characteristics. Summary statistics (e.g., means and standard errors for  
1810 continuous variables, and frequencies and percentages for categorical variables) and graphical  
1811 techniques (e.g., boxplots for continuous variables, and histograms for categorical variables),  
1812 will be used to compare the baseline characteristics of the two treatment groups within study  
1813 sites and the whole study. In addition, we will use t-tests to compare continuous variables and  
1814 Chi square tests for categorical variables.

##### 1815 *2. Primary objective*

1816 The primary objective is to compare the effectiveness of PE and CPT for reducing the severity  
1817 of PTSD symptoms as measured by CAPS total score. The primary outcome is change of  
1818 CAPS total score from baseline (pre-treatment) to the average in the six months post-treatment  
1819 (measured at post-treatment and 3 and 6 months follow-up visits).

1820 Primary analysis: The primary analysis will follow the intent-to-treat (ITT) principle. Participants  
1821 will be counted in the treatment group to which they were randomized, regardless of the number  
1822 of sessions they completed. Linear mixed effects models, with time, treatment, treatment by  
1823 time interaction and site as fixed effects and participant and therapist as random effects, will be  
1824 used to estimate and compare the primary outcome between PE and CPT. The point estimate  
1825 and the 95% confidence interval for the mean difference will be provided.

1826 Secondary analysis: We will provide point estimates and pointwise 95% confidence intervals for  
1827 the mean differences in the CAPS total scores at the three post-treatment timepoints as well as  
1828 the mean differences in changes of CAPS total score from baseline at these post-treatment  
1829 timepoints. We will also compare the longitudinal profiles of CAPS total score (including the  
1830 mid-treatment and post-treatment scores) between PE and CPT by testing the treatment by time  
1831 interaction. When data permits, we will explore site variations in treatment effect and also  
1832 explore the impact of different covariance variance structures (e.g., allowing the variance of  
1833 therapist random effect to differ by treatment or allowing certain variances or covariances to  
1834 vary by time).

1835 Although we anticipate minimum missing data in CAPS total score, we will perform analyses to  
1836 examine the missing data patterns and the impact of missing data. See **Section X.F** for more  
1837 details.

1838 As in CSP #494, we will use the CAPS to derive additional measures of clinical outcomes:  
1839 response (defined as at least 10-point improvement in severity), loss of diagnosis (response  
1840 plus no longer meeting DSM symptom criteria), and remission (loss of diagnosis plus the DSM-5  
1841 score that corresponds to a DSM-IV severity score < 20). The observed proportions and their  
1842 95% confidence intervals will be provided for each treatment group at each of the follow-up  
1843 timepoints. Chi-square tests will be used to compare these outcomes between the two  
1844 treatment groups.

### 1845 3. *Secondary objective*

1846 The secondary objective is to compare the effectiveness of PE and CPT for reducing the  
1847 severity of comorbid mental health problems and service utilization and improving functioning  
1848 and quality of life.

1849 These secondary outcome measures, listed in **Table X.3** below, will be compared between PE  
1850 and CPT to support the comparative effectiveness of these two treatments in CAPS total score.

1851 Except for Brief Addiction Monitor and certain service utilization outcomes (which are  
 1852 categorical measures), all other secondary outcomes are continuous measures and will be  
 1853 analyzed in a manner similar to CAPS total score as described above. Generalized linear  
 1854 mixed effects models (SAS PROC GLIMMIX) will be used to compare the longitudinal profiles of  
 1855 the categorical measures between PE and CPT. Generalized estimating equations may also be  
 1856 used. We do not plan to adjust for multiple comparisons due to the supportive nature of these  
 1857 secondary outcomes.

1858 **Table X.3 Secondary Outcomes**

| Secondary Outcome                   | Time Points             | Type of Data            |
|-------------------------------------|-------------------------|-------------------------|
| Posttraumatic Diagnostic Scale      | Baseline, Post, 3m, 6m  | Continuous              |
| Beck Depression Inventory-II        | Baseline, Post, 3m, 6m  | Continuous              |
| Spielberger State Anger Inventory   | Baseline, Post, 3m, 6m  | Continuous              |
| Brief Addiction Monitor (2 items)   | Baseline, Post, 3m, 6m  | Categorical             |
| Short Inventory of Problems-Revised | Baseline, Post, 3m, 6m  | Continuous              |
| WHO-DAS-II                          | Baseline, Post, 3m, 6m  | Continuous              |
| WHOQOL-BREF                         | Baseline, Post, 3m, 6m  | Continuous              |
| Service Utilization                 | Baseline, Post, 6m      | Categorical, Continuous |
| Client Satisfaction Questionnaire   | Post                    | Continuous              |
| PTSD Checklist                      | weekly during treatment | Continuous              |
| Patient Health Questionnaire-9      | weekly during treatment | Continuous              |

1859

1860 **4. Tertiary objective**

1861 The tertiary objective is to examine whether discrepancy between patient preferences and  
 1862 treatment assignment reduces the effectiveness of each treatment. We will calculate the  
 1863 frequencies and percentages of participants' treatment preference in the entire study sample  
 1864 and also by site, sex, and trauma type. We will examine the impact of participant's treatment  
 1865 preference on treatment effectiveness. Participant's treatment preference, collected before  
 1866 randomization, will be included as a covariate in the regression models to assess if the  
 1867 effectiveness of the treatment on the primary and selected secondary outcomes differs between  
 1868 participants who received their preferred treatment and those who did not receive their preferred  
 1869 treatment. We will also examine if there are differences in treatment adherence and  
 1870 completeness of follow-up. This analysis will be performed in the combined sample and also  
 1871 within each treatment arm.

1872 5. *Exploratory analyses*

1873 We will explore potential heterogeneities of treatment effect in the primary outcome by  
1874 performing tests of treatment by subgroup interaction and by displaying treatment effects with  
1875 their 95% confidence estimates within subgroups. The purpose of these exploratory analyses is  
1876 to detect apparent reversals of effect or major quantitative interactions, in order to describe the  
1877 uniformity or variation of effect appropriately. One major subgroup analysis concerns the sex of  
1878 the participant. By enlisting the help of PBRN, we will try to recruit sites with large pools of  
1879 female PTSD patients in this study; however, despite our efforts, it is not expected that we will  
1880 be able to recruit a sufficient number of females to provide more than a preliminary idea of the  
1881 effect in that subgroup. Other major subgroups will be era, age, race/ethnicity, MST, TBI,  
1882 comorbid depression, and comorbid substance abuse. Because of the exploratory nature of  
1883 these analyses, we do not plan to adjust for multiple comparisons.

1884 We will also compare the following variables between PE and CPT: (1) the proportions of study  
1885 participants meeting the stable remission criterion [early (<12 weeks), on time (12 weeks), late  
1886 (>12 weeks), did not reach remission], by Chi-square tests; (2) the number of weeks to reach  
1887 the stable remission criterion, by logrank tests; and (3) the number of sessions and total number  
1888 of hours delivered, by two-sample t-tests. Mixed effects models or generalized estimating  
1889 equations may be used to incorporate correlations due to therapists or to explore site variation.  
1890 Interpretation of these results will incorporate early withdrawal of study treatment, early  
1891 withdrawal of study, and initiation of non-study treatment for PTSD. We will also examine  
1892 whether and how treatment dose (such as number of sessions and total number of hours),  
1893 treatment engagement (homework) and treatment fidelity (therapist adherence and  
1894 competence) relate to primary and secondary outcomes within and between treatments, and  
1895 whether and how time to stable remission (such as early vs. on time vs. late) relates to  
1896 outcomes within and between treatments.

1897 **E. Interim Analysis**

1898 In the conduct of clinical trials, there is an ethical obligation to review the data on safety, study  
1899 conduct and progress, study feasibility, and efficacy over the course of the study. These study  
1900 data will be reviewed by an independent Data Monitoring Committee (DMC) at least every 6  
1901 months or at other frequencies specified by the DMC. A DMC report will be distributed to all  
1902 members 2-3 weeks prior to meeting. The DMC may recommend early termination of the trial  
1903 based on interim analyses. At its first meeting, the DMC will discuss and decide how it will

1904 conduct interim monitoring for CSP #591. A prototype set of tables and figures for purposes of  
1905 monitoring are given in the appendix section called, “Biostatistical Research Data Processing  
1906 (BRDP)”.

1907 *1. Monitoring of safety and study progress*

1908 Study safety will be monitored by CSPCC and CSP Clinical Research Pharmacy Coordinating  
1909 Center (CSPCRPCC), and reported to the DMC at least every 6 months. A complete description  
1910 of monitoring and reporting adverse events is given in **Section XI**. In the event that serious  
1911 adverse events are noted to be excessive in either group, the DMC may consider  
1912 recommending the study be stopped.

1913 In addition to interim monitoring for safety, the DMC will also monitor patient intake (overall and  
1914 within site), site adherence to the study protocol, data quality, completeness and timeliness of  
1915 follow up and data submission, and baseline comparability of treatment groups. The DMC will  
1916 review the accumulating data and be responsible for determining whether or not to recommend  
1917 to the CSR&D Director that the trial be continued or stopped. Data summaries will be prepared  
1918 for the DMC for these purposes. To aid the DMC in their deliberations, other relevant  
1919 information pertaining to (e.g., secondary analyses) and outside of (e.g., other studies) CSP  
1920 #591 will be made available.

1921 *2. Interim analysis for potential early stopping for efficacy or futility*

1922 The study does not plan to conduct interim analyses to allow early stopping of the study for  
1923 efficacy (when there is sufficient evidence that one treatment is superior to the other treatment)  
1924 or for futility (when it is futile to establish a statistical significant difference at the end of the trial).  
1925 The rationales are (1) both PE and CPT are effective treatments for PTSD, so there are no  
1926 ethical concerns in continuing the study even when it is unlikely to establish a statistical  
1927 significant difference at the end of the trial; (2) even when there are treatment differences  
1928 between PE and CPT, the differences are not likely to alter the VA policy to make all evidence-  
1929 based treatment available to PTSD patients based on interim analysis results; (3) it is important  
1930 from a public health, policy, and scientific perspective to collect sufficient data on the secondary  
1931 outcomes to support findings in the primary outcome, in the hope that the totality of the  
1932 evidence will be able to provide guidance to or change clinical practice; (4) it allows us to  
1933 examine the impact of patient preference on treatment effectiveness, which is one of the key  
1934 elements in personalized medicine.

1935 **F. Procedure for Handling Missing Data**

1936 It is expected that there will be some missing data. Imputation techniques, such as linear  
1937 interpolation and multiple imputation methods will be examined to assess the robustness on the  
1938 results. Completer analyses will also be done based on participants who remained in the study  
1939 throughout the 6-month follow-up period. When large fractions of information are missing, we  
1940 will perform sensitivity analyses under weaker assumptions (e.g., non-ignorable missingness).  
1941 It is recognized, however, that the best approach to missing data is to make all efforts to  
1942 minimize it, since imputation is difficult when the missing data are non-ignorable or not missing  
1943 at random. We will attempt to collect outcome data from all participants at all timepoints  
1944 regardless of whether they continue or complete the study treatment. We will also attempt to  
1945 collect reasons for missing data when possible. Also, the telephone CAPS assessment can  
1946 facilitate completeness by enhancing the convenience for participants, who will not have to  
1947 travel for assessment sessions.

1948 **G. Procedures for Reporting Modifications to the Original Statistical Plan**

1949 Changes to the original statistical plan for analyzing study data will follow the CSP standard  
1950 operating procedures for amending the study protocol, which require review and approval by the  
1951 CSPCC Director and several oversight groups including the Executive Committee and the DMC.  
1952 As needed, updates may also be required to other study documents such as the Case Report  
1953 Forms and Operations Manual.

1954

1955

1956 **XI. MONITORING AND REPORTING ADVERSE EVENTS**

1957 **A. Importance of Adverse Event Reporting**

1958 Timely and complete reporting of safety information assists study management in identifying  
1959 any untoward medical occurrence, thereby allowing: a) protection of safety of study  
1960 participants, b) a greater understanding of the overall safety profile of the study treatments and  
1961 therapeutic modalities, c) improvements in study design or procedures, and d) compliance with  
1962 regulatory requirements.

1963 **B. Role of the Local Site Investigator in Adverse Event Monitoring**

1964 The LSI will be responsible for the adverse event reporting requirements as outlined below:

- 1965
- Reviewing the accuracy and completeness of all adverse events (AE) reported.
- 1966
- Compliance with VA CIRB policies for reporting AEs and/or serious adverse events  
1967 (SAEs).

1968 [\* Note: In June 2015, the VA published an update to “Reporting of Adverse Events in  
1969 Research to the Office of Research Oversight (ORO)” in VHA Handbook 1058.1. Investigators  
1970 should be aware of these reporting requirements. This, however, does not eliminate the need  
1971 for investigators to report both adverse events and serious adverse events to the CSP #591  
1972 Sponsor as per the study protocol.]

- 1973
- Closely monitoring research participants at each study visit for any new SAEs.

1974 **C. Collection of Safety Information**

1975 *1. Adverse Events*

1976 Adverse events (AEs) are defined by the International Conference on Harmonization (ICH) for  
1977 Clinical Safety Data Management (ICH-E2A) as “any untoward medical occurrence in a clinical  
1978 investigation subject that is subjected to one of the study treatments that does not necessarily  
1979 have to have a causal relationship with the treatments. An AE, therefore, can be any  
1980 unfavorable or unintended sign (including an abnormal laboratory finding), symptom, or disease  
1981 temporally associated with the study interventions.”



1982 For the purposes of CSP #591, the study treatments are a) the Prolonged Exposure (PE)  
1983 treatment and related activities and b) the Cognitive Processing Therapy (CPT) treatment and  
1984 related activities.

1985 In this study, information on AEs related to or possibly related to study treatments and on all  
1986 serious adverse events (SAEs) will be collected and recorded. See the section below on  
1987 “Relatedness”. There is a separate section below that describes the collection of safety  
1988 information for SAEs.

1989 The reporting period for AEs begins when the participant signs the informed consent form and  
1990 continues until the participant’s completion or early termination of study participation or the end  
1991 of the study. Each related/possibly related AE will be reported to the Sponsor, the VA  
1992 Cooperative Studies Program, including any increase in frequency or severity of a condition that  
1993 was present prior to the start of the study. During the study, adverse events can be  
1994 spontaneously reported or elicited during open-ended questioning, examination, or evaluation of  
1995 the participant at study visits.

1996 Related or possibly related adverse events not meeting the criteria for an SAE (see below) must  
1997 be recorded on the Adverse Event Form. (Those that meet SAE criteria are documented on the  
1998 SAE Form). One form should be completed for each AE reported. Adverse events should be  
1999 reported in sequential order as they occur and submitted with the other case report forms for the  
2000 participant’s visit.

2001 a. Adverse Event Classification

2002 *Severity:*

|          |                                                          |
|----------|----------------------------------------------------------|
| Mild     | Does not interfere with normal activity (not reportable) |
| Moderate | Interferes with normal activity to some extent           |
| Severe   | Interferes significantly with normal activity            |

2003 Note: Only AEs classified as either “Moderate” or “Severe” must be reported.

2004 *Examples of Mild (not reportable) vs. Moderate (reportable) Adverse Events*

- |                                                                                                                                                                                                                                                                                                                                                                                                                                                                                                                                                                                                       |
|-------------------------------------------------------------------------------------------------------------------------------------------------------------------------------------------------------------------------------------------------------------------------------------------------------------------------------------------------------------------------------------------------------------------------------------------------------------------------------------------------------------------------------------------------------------------------------------------------------|
| <ol style="list-style-type: none"><li>1. Pre-existing conditions that are documented in the medical record at the time of informed consent: only report as AEs (moderate or severe) those that increase in frequency and or severity.</li><li>2. Arthritis: Normal waxing and waning – do not report. Pain that requires a steroid injection or prevents patient from moving around as normal → report as an AE.</li><li>3. Headache: Common type of headache that may require a non-steroidal agent that occurs every once in awhile → do not report as an AE. Migraine-like headache that</li></ol> |
|-------------------------------------------------------------------------------------------------------------------------------------------------------------------------------------------------------------------------------------------------------------------------------------------------------------------------------------------------------------------------------------------------------------------------------------------------------------------------------------------------------------------------------------------------------------------------------------------------------|

keeps the patient in bed with no light or prevents him/her from going to work → report as an AE.

4. Report any adverse event after informed consent that is associated with new diagnoses, e.g. hypertension, anxiety, depression, etc.
5. Common colds: Do not report as an AE unless cold develops into pneumonia or some other type of serious upper respiratory infection.
6. To further differentiate between mild and moderate – if patient can still do normal activities of living in spite of the “adverse event” → do not report as an AE. If the AE prevents the patient from being able to do one or more activities of daily living, it would be considered “moderate” → report as an AE. If the AE results in the patient needing to go to the ER or hospital, it would be considered an SAE and should also be reported on an SAE Form.

2005

2006 b. Relatedness

2007 The investigator and sub-investigators are responsible for determining if an adverse event may  
2008 be related with one of the study treatments based on their medical expertise, familiarity with the  
2009 therapeutic category of the study treatment, and the emergence of the general clinical picture  
2010 developed over the course of the study. Recall that only related or possibly related AEs that do  
2011 not meet SAE criteria are reported on study forms.

2012 Relatedness involves an assessment of the degree of causality (attributability) between the  
2013 study intervention and the event. The assessment provided by the LSI is part of the information  
2014 used by the sponsor to determine if the adverse event presents a patient safety concern.

2015 Pursuant to CSP Global SOP 3.6, an AE is deemed to be associated with the use of a study  
2016 intervention if “[t]here is a reasonable possibility that the experience may have been caused by  
2017 the intervention or by participation in the trial.” Thus, all adverse events with a reasonable  
2018 causal relationship to the study intervention should be considered “related”. A definite  
2019 relationship does not need to be established. The following levels of relatedness will be used in  
2020 this trial:

- 2021 • Not attributed to a study intervention
- 2022 • Possibly attributed to a study intervention
- 2023 • Attributed to a study intervention

2024 c. Adverse Event Follow-Up  
2025 For each reported AE, investigators follow up with participants until the event resolves and  
2026 ensure that appropriate care is provided, but there is no case report form to fill for AE follow-up.  
2027 Adverse events must be reported as Serious Adverse Events (SAE) if they meet the SAE  
2028 reporting requirements described below.

2029 2. *Serious Adverse Events*

2030 a. Definition of Serious Adverse Event (SAE)

2031 Serious adverse events are defined by the ICH for Clinical Safety Data Management and CSP  
2032 Global SOP 3.6.3, as any untoward medical occurrence that:

- 2033 • Results in death,
- 2034 • Is life threatening,
- 2035 • Requires inpatient hospitalization or prolongation of existing hospitalization,
- 2036 • Results in persistent or significant disability or incapacity,
- 2037 • Is a congenital anomaly/birth defect, or
- 2038 • Is an important medical event that may not result in death, be life-threatening, or require  
2039 hospitalization (an event may be considered serious when, based upon appropriate  
2040 medical judgment, it may jeopardize the participant and may require medical or surgical  
2041 intervention to prevent one of the outcomes listed in this definition).

2042 Any adverse event that meets the definition of “Serious” will be reported on an SAE Form. All  
2043 SAEs will be classified as either “related,” “possibly related,” or “not related” to study  
2044 intervention. A definite causal relationship does not need to be established.

2045 b. Serious Adverse Event Monitoring

2046 Participants will be monitored for SAEs at each study visit. Each serious adverse event is  
2047 reported on an SAE Form. Active monitoring for SAEs begins at the time the Informed Consent  
2048 Form is signed and continues until the earlier of the 30 days after the participant’s completion or  
2049 early termination of study participation or the end of the study. The date study participation  
2050 ends is entered on the Study Completion/Termination Form.

2051 **D. Expedited Reporting of Serious Adverse Events**

2052 All SAEs require prompt reporting to the CSP Clinical Research Pharmacy Coordinating Center  
2053 (CSPCRPCC) within 72 hours of the LSI becoming aware of the event. The CSP #591 Adverse  
2054 Event (AE) Specialist at the CSPCRPCC is responsible for evaluating all SAEs for patient safety  
2055 concerns and regulatory reporting. The AE Specialist will consult with the Chairman's office  
2056 during the review process, as necessary. CSPCRPCC maintains a database of serious events  
2057 for evaluation, by using the Medical Dictionary for Regulatory Activities (MedDRA) for coding  
2058 and trending. Periodic summaries will be provided to the Data Monitoring Committee, the Study  
2059 Chairman's office and Executive Committee (as necessary). Events that are determined to be  
2060 serious, unexpected, and related to the study treatments will be reported to the LSIs, CIRB, and  
2061 to the VA Cooperative Studies Program Central Office.

2062 SAE Forms will be sent to the Palo Alto CSPCC. The CSPCRPCC will also have access to the  
2063 information on the SAE Forms.

2064 1. *SAE Follow-up Reporting*

2065 Serious adverse events should be followed to resolution, stabilization, or the end of the study,  
2066 whichever occurs first. If an SAE is still ongoing by the time the SAE Form is submitted to the  
2067 Palo Alto CSPCC, complete an SAE Follow-up Form every 30 days until the SAE is resolved or  
2068 stabilized. SAE Follow-up Forms will be sent to the Palo Alto CSPCC.

2069 **E. Reporting Adverse Events and Serious Adverse Events to the VA Central IRB**

2070 It is the responsibility of the LSI / SC at each participating site to know and comply with the AE  
2071 and SAE reporting requirements of the VA CIRB. Information on VA CIRB's reporting  
2072 requirements can be found on the VA CIRB website (<http://www.research.va.gov/vacentralirb/>)  
2073 or by contacting the AE Specialist.

2074 Questions about managing or reporting of adverse events or serious adverse events will be  
2075 addressed by the AE Specialist at the CSPCRPCC or the CSP #591 National Study  
2076 Coordinator. In all instances of AE, Central IRB procedures and VHA Handbook 1058.01 will be  
2077 followed.

2078

2079

2080 **XII. QUALITY CONTROL**

2081 **A. Standardization/Validation of Measurements**

2082 Details about quality control for assessment procedures are provided in **Sections VIII.A.3-5**  
2083 (procedures to enhance completion of assessment protocols, double-blinding, and reliability).

2084 **B. Treatment**

2085 Details about quality control for treatment are provided in **Sections VIII.F** (training and  
2086 supervision) and **VIII.G** (therapy fidelity monitoring).

2087 **C. Masking**

2088 Centrally located interviews will perform assessment by telephone, which minimizes the risk of  
2089 unblinding. In addition, assessors will remind participants not to reveal their treatment  
2090 assignment during the assessment interviews.

2091 **D. Monitoring Participant Intake and Probation/Termination of Participating Centers**

2092 During the course of a study, it may be necessary to drop one or more participating medical  
2093 centers from the study. Such action must have the prior approval of the CSPCC Director and  
2094 the Director of VA CSR&D. Early termination is usually based on recommendations from the  
2095 Executive Committee and the DMC and most often reflects inadequate participant intake or  
2096 serious noncompliance with Good Clinical Practices. This action should always be based on  
2097 the best interests of the study and study participants and does not necessarily imply poor  
2098 performance on the part of the SI or the medical center. Termination will be conducted per CSP  
2099 guidelines.

2100 *1. Enrollment Issues*

2101 The Study Chairs and the Study Biostatistician will monitor the intake rate and operational  
2102 aspects of the study. Participating medical centers will continue in the study only if adequate  
2103 participant intake is maintained. The Executive Committee may take action leading to the  
2104 discontinuation of enrollment at a center with the concurrence of the CSPCC Director and the  
2105 Director of VA CSR&D. If recruitment is not proceeding at an appropriate rate, the Study Chairs  
2106 and Study Biostatistician will scrutinize the reasons for participant exclusions and other barriers  
2107 to recruitment. Based on this information, the Executive Committee may choose, with the  
2108 approval of the DMC and the Director, VA CSR&D, to drop centers, add additional centers,

2109 make minor modifications to the inclusion/exclusion criteria, or extend the recruitment period.  
2110 Participating sites that enroll below target during the first 12 months of the study may be placed  
2111 on probation and given an opportunity to improve within a reasonable period. If a medical center  
2112 is placed on probation, the Study Chairs will confer with the site personnel and may visit the  
2113 site, if necessary, to help improve the rate of recruitment. If there is no improvement in accrual  
2114 during the probation period, the site may be subject to reduced funding or possible termination  
2115 as a study site. To prevent the delay in adding new sites, we plan to start the study with 17  
2116 recruiting sites, which is about 3 more than needed from the sample size requirement of 14.1.  
2117 The Executive Committee will take actions leading to discontinuation of a site only with the  
2118 concurrence of the CSPCC Director. If a site is terminated from the trial, resources will be  
2119 reallocated to other medical centers or used to start up a back-up site. Central IRB will be  
2120 informed of all site terminations and probations.

2121 *2. Non-adherence to the protocol and/or Good Clinical Practice (GCP) Guidelines*

2122 Strict adherence to the protocol and GCP guidelines will be expected of every participating  
2123 medical center and monitored by the DMC, the Executive Committee, and the Study Group.  
2124 Documentation of protocol violations will be required. Medical centers with repeated protocol  
2125 violations or repeated failures to follow GCP Guidelines will be recommended for termination to  
2126 the DMC, the CSPCC Director, and the Director of VA CSR&D. If a participating investigator  
2127 feels that adherence to the protocol may result in an apparent immediate hazard to the  
2128 participant, the interest of the participant must take precedence.

2129 Protocol violations must be reported to the CSPCC on the appropriate case report form and to  
2130 the Central IRB to ensure immediate hazard to the participant did not occur.

2131 By agreeing to participate in the study, the medical center delegates responsibility for global  
2132 monitoring of the ongoing study to the Cooperative Studies Program Committee and personnel  
2133 listed above. However, the Research and Development (R&D) Committee and the VA Central  
2134 IRB may require the participating investigator to submit annual and final progress reports  
2135 concerning the status of the study at the medical center for local monitoring purposes.

2136

2137 **XIII. ORGANIZATION & ADMINISTRATION**

2138 The organizational and administrative structure of this cooperative study will be similar to others  
2139 in the Cooperative Studies Program. Specifically, it will include the following components:

2140 The Cooperative Studies Program (VA Central Office) establishes overall policies and  
2141 procedures which are applied to all VA cooperative studies through the Study Chairs' offices,  
2142 and the Palo Alto CSPCC.

2143 The Palo Alto CSPCC and the Study Chairs offices jointly will perform the day-to-day scientific  
2144 and administrative coordination of the study. These include developing the study protocol,  
2145 operations manual, and case report forms; ensuring the appropriate support for the participating  
2146 centers; scheduling meetings and conference calls; answering questions about the protocol;  
2147 conducting site visits; publishing newsletters; preparing interim and final progress reports; and  
2148 archiving study data at the end of the study. Interim statistical progress reports will be produced  
2149 every six months. Participant accrual and data quality will be monitored closely to ensure that  
2150 the study is progressing satisfactorily. The PBRN Coordinating Center will assist with advising  
2151 on strategies for recruitment and retention of women, monitoring recruitment and retention of  
2152 women, and conducting entry and analysis VFF data.

2153 The CSP Clinical Research Pharmacy Coordinating Center (CSPCRPCC) provides advice and  
2154 consultation about protocol development, procedure implementation, and participant safety  
2155 issues. CSPCRPCC is responsible for monitoring and reporting the safety of trial participants  
2156 through the review, assessment, and communication of adverse events and serious adverse  
2157 events reported by study personnel with reviewing responsibilities occurring through ongoing  
2158 communication with the Study Chairs, Executive Committee, Data Coordinating Center, and  
2159 CSP Central Office. The reporting activities include the filing of regulatory documents involving  
2160 adverse events to meet federal regulations and CSP policies. In conjunction with the Data  
2161 Coordinating Center, the CSPCRPCC trends and analyzes safety data in order to prepare  
2162 reports for various committees including the Data Monitoring Committee (DMC), VA Central  
2163 Institutional Review Board (CIRB), Study Executive Committee(s), and study investigator  
2164 meetings.

2165 Each participating VA medical center will designate a Local Site Investigator (LSI) to be  
2166 responsible administratively and scientifically for the conduct of the study at the center. LSIs will  
2167 be expected to attend all annual Study Group meetings, as well as to hire and supervise  
2168 personnel. By agreeing to participate in the study, the medical center delegates responsibility for  
2169 global monitoring of the ongoing study to the DMC, and the Cooperative Studies Scientific  
2170 Evaluation Committee. However, the Research and Development Committee (R&D) and the  
2171 Cental IRB may require the participating investigator to submit annual reports concerning the

2172 status of the study at the medical center for local monitoring purposes.

2173 The Cooperative Studies Scientific Evaluation Committee (CSSEC) reviews the scientific merit  
2174 of all new cooperative study proposals and all ongoing cooperative studies as deemed  
2175 necessary. The committee is composed of both VA and non-VA clinical research scientists,  
2176 most of whom have had experience in managing their own cooperative studies.

2177 The Study Group will be composed of the SIs from each participating center, the Study Chairs,  
2178 and CSP staff (Biostatistician, Project Manager, Clinical Research Pharmacist, and others). The  
2179 Study Chairs will head the group, which will meet once per year to discuss the progress of the  
2180 study, any problems that the investigators have encountered, and any suggestions for improving  
2181 the study.

2182 The Executive Committee will be concerned with the overall management of the study. It will be  
2183 headed by the Study Chairs and will consist of the study Biostatistician, study Project Manager,  
2184 Clinical Research Pharmacist, selected participating investigators, and outside consultants as  
2185 needed. This committee will meet every month to review study conduct and progress, decide  
2186 upon changes in the study, determine the fate of hospitals whose performance is substandard,  
2187 initiate any sub-protocols, and discuss publication of the study results.

2188 The Data Monitoring Committee (DMC) will provide independent and unbiased reviews of the  
2189 study's progress and will monitor patient intake, outcomes, adverse events, and other issues  
2190 related to patient safety. This committee will be composed of two biostatisticians and several  
2191 physicians with expertise in the subject area(s) of the study. The Study Chairs, study  
2192 Biostatistician, study AE Specialist, and the Director of the CSPCC are *ex officio* (liaison, non-  
2193 voting) members of the committee. The DMC will meet every 6 months to monitor the study. Its  
2194 primary responsibility is to review the progress of the study and to decide whether or not the  
2195 study should continue. To help them make their assessment, the Study Chairs and Study  
2196 Biostatistician will furnish the DMC with appropriate monitoring data before each meeting.

2197 The Palo Alto CSPCC Human Rights Committee (HRC), composed primarily of lay people, may  
2198 be called upon to review new protocols, periodically make site visits to participating centers to  
2199 monitor participant involvement in the study, and review and consult on any ethical and human  
2200 rights issues that arise during the conduct of the study. Prior to participation, each site's local  
2201 R&D and the VA Central IRB (CIRB) must also review and approve its involvement in the study.



2202 The CSP Site Monitoring, Auditing and Resource Team (SMART), located at the CSP Clinical  
2203 Research Pharmacy Coordinating Center (CSPCRPCC) in Albuquerque, NM will monitor the  
2204 trial for compliance with Good Clinical Practices (GCP). GCP reviewers from SMART will visit  
2205 participating sites shortly after enrollment is initiated to monitor investigator regulatory  
2206 compliance, protocol adherence, and overall research practices. In addition to the regularly  
2207 scheduled GCP review visits, an independent comprehensive GCP site audit may be conducted  
2208 at any time at the request of CSP study management.

2209

2210

2211 **XIV. GOOD CLINICAL PRACTICE (GCP)**

2212 **A. Role of GCP**

2213 This trial will be conducted in compliance with Good Clinical Practice (GCP) regulations.  
2214 The intent of these regulations is to safeguard subjects' welfare and assure the validity  
2215 of data resulting from the clinical research. The VA Cooperative Studies Program will  
2216 assist Local Site Investigators (LSIs) in complying with GCP requirements through its  
2217 Site Monitoring, Auditing and Resource Team (SMART) based in Albuquerque, NM.  
2218 SMART serves as the Quality Assurance arm of CSP for GCP compliance. Study site  
2219 personnel will receive GCP training at the study organizational meeting. SMART will  
2220 provide training, manuals and materials to assist study personnel in organizing study  
2221 files and will be available throughout the trial to advise and assist LSIs regarding GCP  
2222 issues.

2223 **B. Summary of Monitoring and Auditing Plans**

2224 1. *Monitoring Visits*

- 2225 • Initiation visits at each site soon after study start-up
- 2226 • Additional monitoring visits may be conducted as deemed necessary by study leadership  
2227 or SMART.

2228 2. *Audits*

- 2229 • Routine audits – independent site visits to one or more sites per year as determined by  
2230 SMART.
- 2231 • For-Cause audits –independent audit of a site as requested by study leadership or CSP  
2232 Central Office.
- 2233 • Audits may be scheduled or unannounced.

2234

2235 **XV. PUBLICATIONS**

2236 **A. Publication Plan**

2237 It is the policy of the CSP that outcome data will not be revealed to the participating  
2238 investigators and Study Chairman until the data collection phase of the study is completed. This  
2239 policy safeguards against possible biases affecting the data collection.

2240 All presentations and publications from this study will be done in accordance with the CSP  
2241 policy as stated in the CSP Guidelines. The presentation or publication of any data collected by  
2242 investigators on participants entered into the VA cooperative study is under the control of the  
2243 study's Executive Committee. This is true whether the publication or presentation is concerned  
2244 with the results of the principal undertaking or is associated with the study in some other way.  
2245 No individual participating investigator is permitted to perform analyses or interpretations or to  
2246 make public presentations or seek publication of any of the data other than under the auspices  
2247 and approval of the Executive Committee.

2248 The Executive Committee has the authority to establish one or more publication committees,  
2249 usually made up of subgroups of participating investigators and some members of the Executive  
2250 Committee, for the purpose of producing manuscripts for presentation and publication. All  
2251 presentations and publications will be circulated to all participating investigators for their review,  
2252 comments, and suggestions, at least four weeks prior to submission of the manuscript to the  
2253 presenting or publication body.

2254 Authorship should include the Study Chairs, the National Study Coordinator, members of the  
2255 Executive Committee, and Participating Investigators from top recruiting centers. The number of  
2256 authors will not exceed individual journal limitations. All publications must give proper  
2257 recognition to the Study's funding source. If an investigator's major salary support and/or  
2258 commitment are from the VA, the investigator must list the VA as his/her primary institutional  
2259 affiliation. Submission of manuscripts or abstracts must follow the usual VA policy. Ideally, a  
2260 subtitle is used stating, "A VA Cooperative Study." A copy of the letter to the editor and the  
2261 manuscript/abstract submitted for publication/presentation should be sent to the CSP Director,  
2262 and for information purposes, to the members of the study's DMC. The CSP also requires that a  
2263 copy of every manuscript must be reviewed and approved by the CSPCC Director prior to  
2264 submission as a last quality control step.

2265 **B. Planned publications**

2266 The following is a list of proposed manuscripts for CSP #591:

2267 1. *Comparative Effectiveness of Prolonged Exposure and Cognitive Processing Therapy for*  
2268 *the Treatment of PTSD*

2269 This manuscript will present findings pertaining to the primary and secondary objectives of the  
2270 study: (1) to compare the effectiveness of Prolonged Exposure and Cognitive Processing  
2271 Therapy for reducing the severity of PTSD symptoms; and (2) to compare the effectiveness of  
2272 Prolonged Exposure and Cognitive Processing Therapy for reducing the severity of comorbid  
2273 mental health problems and service utilization and improving functioning and quality of life.

2274 2. *Effect of Participant Preferences for Treatment on Response to Prolonged Exposure and*  
2275 *Cognitive Processing Therapy for PTSD*

2276 This manuscript will describe sociodemographic and clinical factors related to preference for  
2277 Prolonged Exposure versus Cognitive Processing Therapy and will examine whether receiving  
2278 preferred treatment affects treatment outcome.

2279 3. *Predictors of Clinical Outcome in Cognitive-Behavioral Therapy for PTSD*

2280 This manuscript will examine whether pretreatment sociodemographic and clinical factors (such  
2281 as gender, race/ethnicity, era, type of trauma, MST, TBI, and comorbidity) differentially predict  
2282 response to and dropout from Prolonged Exposure and Cognitive Processing Therapy.

2283 4. *The Longitudinal Course of Symptoms during and after Cognitive-Behavioral Therapy for*  
2284 *PTSD*

2285 This manuscript will compare the course of change in PTSD and depression during treatment  
2286 and after treatment and second, during the entire study period, using the study by Resick et al.  
2287 (2008) as a model. Individual trajectories of symptom change will be explored, and baseline  
2288 factors associated with these patterns will be examined.

2289 5. *Symptomatic Versus Functional Outcomes in Cognitive-Behavioral Therapy for PTSD*

2290 This manuscript will examine longitudinal relationships between symptoms and functional  
2291 outcomes during and after the course of treatment, using the manuscript by Schnurr et al.  
2292 (2006) as a model.

2293 6. *Design of CSP #591: A Comparative Effectiveness Trial of Cognitive-Behavioral Therapies*  
2294 *for PTSD*

2295 This manuscript will describe the design of CSP #591. We will describe unique challenges we  
2296 faced in the designing the study and the rationale for decisions about the methods.

2297

2298

2299 **XVI. REFERENCES**

- 2300 Agency for Healthcare Research and Quality. (2012). *Psychological treatments and*  
2301 *pharmacological treatments for adults with posttraumatic stress disorder (PTSD)*. Draft  
2302 Comparative Effectiveness Review. Rockville, MD: Author.
- 2303 American Psychiatric Association Work Group on ASD and PTSD. (2004). *Practice guidelines*  
2304 *for the treatment of patients with acute stress disorder and posttraumatic stress disorder*.  
2305 Washington, DC: American Psychiatric Association.
- 2306 American Psychiatric Association. (1994). *Diagnostic and statistical manual of mental*  
2307 *disorders*. Washington, DC: Author.
- 2308 Asukai, N., Saito, A., Tsuruta, N., et al. (2010). Efficacy of exposure therapy for Japanese  
2309 patients with posttraumatic stress disorder due to mixed traumatic events: A randomized  
2310 controlled study. *Journal of Traumatic Stress, 23*, 744-750.
- 2311 Attkisson, C.C., & Zwick, R.J. (1982). The Client Satisfaction Questionnaire: Psychometric  
2312 properties and correlations with service utilization and psychotherapy outcome. *Evaluation*  
2313 *and Program Planning, 5*, 233-237.
- 2314 Aziz, M.A., & Kenford, S. (2004). Comparability of telephone and face-to-face interviews in  
2315 assessing patients with posttraumatic stress disorder. *Journal of Psychiatric Practice, 10*,  
2316 307-313.
- 2317 Baldwin, S.A., & Berkeljon, A. (2009). Rates of change in naturalistic psychotherapy:  
2318 Contrasting dose-effect and good-enough level models of change. *Journal of Consulting and*  
2319 *Clinical Psychology, 77*, 203-2011.
- 2320 Beck, A.T., Steer, R.A., Ball, R., et al. (1996). Comparison of Beck Depression Inventories -IA  
2321 and -II in psychiatric outpatients. *Journal of Personality Assessment, 67*, 588-597.
- 2322 Bliese, P.D., Wright, K.M., Adler A.B., et al. (2008). Validating the Primary Care Posttraumatic  
2323 Stress Disorder Screen and the Posttraumatic Stress Disorder Checklist with soldiers  
2324 returning from combat. *Journal of Consulting and Clinical Psychology, 76*, 272-281.
- 2325 Borkovec, T.D., & Nau, S.D. (1972). Credibility of analogue therapy rationales. *Journal of*  
2326 *Behavior Therapy and Experimental Psychiatry, 3*, 257-260.
- 2327 Cacciola, J.S., Alterman, A.I., DePhilippis, D., et al. (in press). Development and initial  
2328 evaluation of the Brief Addicition Monitor (BAM). *Journal of Substance Abuse Treatment*.
- 2329 Campbell, MJ, Donner, A., & Klar, N. (2007). Developments in cluster randomized trials and  
2330 statistics in medicine. *Statistics in Medicine, 26*, 2-19.
- 2331 Chard, K. (2005). An evaluation of Cognitive Processing Therapy for the treatment of  
2332 posttraumatic stress disorder related to childhood sexual abuse. *Journal of Consulting and*  
2333 *Clinical Psychology, 73*, 965-971.
- 2334 Chard, K., Schumm, J., McIlvain, S., et al. (2011). *Examining the effectiveness of CPT-*  
2335 *Cognitive (CPT-C) for veterans with PTSD and traumatic brain injury in a residential setting*.  
2336 *Journal of Traumatic Stress, 24*, 347-351.
- 2337 Chard, K., Schumm, J., Owen, G., et al. (2010). A comparison of OEF/OIF and Vietnam  
2338 veterans receiving Cognitive Processing Therapy. *Journal of Traumatic Stress, 23*, 25-32.
- 2339 Cohen, J. (1988) *Statistical power analysis for the behavioral sciences* (2nd ed.). Hillsdale, NJ:  
2340 Erlbaum.
- 2341 Cook, J.M. (Principal Investigator). (ongoing) Sustained use of Evidence-based PTSD  
2342 treatment in VA residential settings. National Institute of Mental Health 1R01MH096810-  
2343 01A1.
- 2344 Cook, J.M., O'Donnell, C.O., Dinnen, et al. (2012). Measurement of a model of implementation  
2345 for health care: toward a testable theory. *Implementation Science, 7*.
- 2346 Departments of Veterans Affairs and Defense. (2010). *VA/DoD Clinical practice guideline for*  
2347 *management of post-traumatic stress*. Washington, DC: Author.

- 2348 Ehlers, A., Clark, D.M., Hackmann, A., et al. (2005). Cognitive therapy for post-traumatic stress  
2349 disorder: Development and evaluation. *Behaviour Research and Therapy*, 43, 413-431.
- 2350 Falik, D., Wang, X.Q., Liu, L., et al. (2010). Percentage of subjects with no heavy drinking days:  
2351 Evaluaiton as an efficacy endpoint for alcohol clinical trials. *Alcoholism: Clinical and*  
2352 *Experimental Research*, 34, 2022-2034.
- 2353 Feeny, N.C., Hembree, E.A., & Zoellner, L.A. (2003). Myths regarding exposure therapy for  
2354 PTSD. *Cognitive and Behavioral Practice*, 10, 85-90.
- 2355 Feeny, N.C., Zoellner, L.A., Mavissakalian, M., et al. (2010, November). *A doubly randomized*  
2356 *preference trial: Prolonged Exposure versus sertraline for PTSD*. Annual Meeting of the  
2357 Association of Behavioral and Cognitive Therapy. Toronto, Canada.
- 2358 First, M.B., Spitzer, R.L., Gibbon, M., et al. (2002). Structured Clinical Interview for DSM-IV-TR  
2359 Axis I Disorders, Research Version, Patient Edition. (SCID-I/P) New York: Biometrics  
2360 Research, New York State Psychiatric Institute.
- 2361 Foa E.B., & Cahill S.P. (2001). Psychological therapies: Emotional processing. In Smelser, N.J.,  
2362 Bates P.B.,(Eds.), *International Encyclopedia of Social and Behavioral Sciences* (pp.12363-  
2363 12369). Oxford: Elsevier.
- 2364 Foa, E.B., & Kozak, M.J. (1986). Emotional processing of fear: Exposure to corrective  
2365 information. *Psychological Bulletin*, 99, 20-35.
- 2366 Foa, E.B., Cashman, L., Jaycox, L., et al. (1997). The validation of a self-report measure of  
2367 posttraumatic stress disorder: The Posttraumatic Diagnostic Scale. *Psychological*  
2368 *Assessment*, 9, 445-451.
- 2369 Foa, E.B., Dançu, C.V., Hembree, E.A., et al. (1999). A comparison of exposure therapy,  
2370 stress inoculation training, and their combination for reducing posttraumatic stress disorder  
2371 in female assault victims. *Journal of Consulting and Clinical Psychology*, 67, 194-200.
- 2372 Foa, E.B., Hembree, E.A., & Rothbaum, B.O. (2007). *Prolonged Exposure therapy for PTSD:*  
2373 *Emotional processing of traumatic experiences. Therapist's guide*. New York: Oxford.
- 2374 Foa, E.B., Hembree, E.A., Cahill, S.P., et al. (2005). Randomized trial of prolonged exposure for  
2375 posttraumatic stress disorder with and without cognitive restructuring: Outcome at academic  
2376 and community clinics. *Journal of Consulting and Clinical Psychology*, 73, 953-964.
- 2377 Foa, E.B., Keane, T.M., Friedman, M.J., et al. (Eds.). (2008). *Effective treatments for PTSD:*  
2378 *Practice guidelines from the International Society for Traumatic Stress Studies* (2nd ed.).  
2379 New York: Guilford Press.
- 2380 Fontana, A., & Rosenheck, R. (2008). Treatment-seeking veterans of Iraq and Afghanistan:  
2381 Comparison with veterans of previous wars. *Journal of Nervous and Mental Disease*, 196,  
2382 513–521.
- 2383 Galovski, T. E., Blain, L., Mott, J., et al. (in press). Manualized therapy for PTSD: Flexing the  
2384 structure of Cognitive Processing Therapy. *Journal of Consulting and Clinical Psychology*.
- 2385 Greenhalgh, T., Glenn, R., Bate, P., et al. (2005). *Diffusion of innovations in health service*  
2386 *organizations: A systematic literature review*. Oxford, England: Blackwell Publishing.
- 2387 Griffin, M.G., Uhlmansiek, M.H., Resick, P.A., et al. (2004). Comparison of the Posttraumatic  
2388 Stress Disorder Scale versus the Clinician-Administered Posttraumatic Stress Disorder  
2389 Scale in domestic violence survivors. *Journal of Traumatic Stress*, 17, 497-503.
- 2390 Hembree, E.A., Foa, E.B., Dorfan, N.M., et al. (2003). Do patients drop out prematurely from  
2391 exposure therapy for PTSD? *Journal of Traumatic Stress*, 16, 555-562.
- 2392 Hermes, E.D.A., Rosenheck, R.A., Desai, R.A., et al. (2012). Recent trends in the treatment of  
2393 posttraumatic stress disorder and other mental disorders in the VHA. *Psychiatric Services*,  
2394 63, 471–476.
- 2395 Hoge, C.W., McGurk, D., Thomas, J.L., et al. (2008). Mild traumatic *brain* injuries in U.S.  
2396 soldiers returning from Iraq. *New England Journal of Medicine*, 358, 453-463.
- 2397 Howard, K.I., Kopta, M.S., Krause, M.S, et al. (1986). The dose-effect relationship in  
2398 psychotherapy. *American Psychologist*, 41, 159-164.

- 2399 Institute of Medicine (2008). *Treatment of posttraumatic stress disorder: An assessment of the*  
 2400 *evidence*. Washington, DC: National Academies Press.
- 2401 Institute of Medicine (2009). *Initial national priorities for comparative effectiveness research*.  
 2402 Washington, DC: National Academies Press.
- 2403 Jacobson, N.S., & Truax, P. (1991) Clinical significance: A statistical approach to defining  
 2404 meaningful change in psychotherapy research. *Journal of Consulting and Clinical*  
 2405 *Psychology, 59*, 12-19.
- 2406 Karlin, B.E., Ruzek, J.I., Chard, K.M., et al. (2010). Dissemination of evidence-based  
 2407 psychological treatments for posttraumatic stress disorder in the Veterans Health  
 2408 Administration. *Journal of Traumatic Stress, 23*, 663-673.
- 2409 Kessler, R.C., Chiu, W.T., Demler, O., et al. (2005). Prevalence, severity, and comorbidity of  
 2410 12-month DSM-IV disorders in the National Comorbidity Survey Replication. *Archives of*  
 2411 *General Psychiatry, 62*, 617-627.
- 2412 Kessler, R.C., Petukhova, M., Sampson, N.A., et al. (2012). Twelve-month and lifetime  
 2413 prevalence and lifetime morbid risk of anxiety and mood disorders in the United States.  
 2414 *International Journal of Methods in Psychiatric Research, 21*, 169-184.
- 2415 Kessler, R.C., Sonnega, A., Bromet, E., Hughes, M., & Nelson, C.B. (1995). Posttraumatic  
 2416 stress disorder in the National Comorbidity Survey. *Archives of General Psychiatry, 52*,  
 2417 1048-1060.
- 2418 Kiluk, B.D., Dreifuss, J.A., Weiss, R.D., et al. (in press). The Short Inventory of Problems-  
 2419 Revised: Psychometric properties within a large, diverse sample of substance use disorder  
 2420 treatment seekers. *Psychology of Addictive Behaviors*.
- 2421 Kimerling, R., Gima, K.S., Smith, M.W., et al. (2008). The Veterans Health Administration and  
 2422 military sexual trauma. *American Journal of Public Health, 97*, 2160-2166.
- 2423 Kroenke, K., Spitzer, R.L., & Williams, J.B.W. (2001). The PHQ-9: Validity of a brief depression  
 2424 severity measure. *Journal of General Internal Medicine, 16*, 606-613.
- 2425 Kulka, R.A., Schlenger, W.E., Fairbank, J.A., et al. (1990). *Trauma and the Vietnam War*  
 2426 *generation: Report of findings from the National Vietnam Veterans Readjustment Study*.  
 2427 New York: Brunner/Mazel.
- 2428 Levitt, J.T., Malta, L.S., Martin, A., et al. (2007). The flexible application of a manualized  
 2429 treatment for PTSD symptoms and functional impairment related to the 9/11 World Trade  
 2430 Center attack. *Behaviour Research and Therapy, 45*, 1419-1433.
- 2431 Linehan, M.M., Comtois, K.A., & Ward-Ciesielski, E.F. (2012). Assessing and managing risk  
 2432 with suicidal individuals. *Cognitive and Behavioral Practice, 19*, 218-232.
- 2433 Lowe, B., Unützer, J., Callahan, C.M., et al. (2004). Monitoring depression treatment outcomes  
 2434 with the Patient Health Questionnaire-9. *Medical Care, 42*, 1194-1201.
- 2435 Machin, D., Campbell, M.J, Tan, S.B., et al. (2009). *Sample size tables for clinical studies, 3<sup>rd</sup> ed.*  
 2436 (Chapter 6). Oxford, UK: Wiley-Blackwell.
- 2437 Magruder, K.M., Frueh, B.C., Knapp, R.G., et al. (2005). Prevalence of posttraumatic stress  
 2438 disorder in Veterans Affairs primary care clinics. *General Hospital Psychiatry, 27*, 169-79.
- 2439 Miser, WF, Wallace, LS. Research Study Participant Satisfaction Survey. The Ohio State  
 2440 University Center for Clinical and Translational Science. Request online:  
 2441 [https://ccts.osu.edu/research-support-services/recruitment-and-retention/research-study-](https://ccts.osu.edu/research-support-services/recruitment-and-retention/research-study-participant-satisfaction-survey)  
 2442 [participant-satisfaction-survey](https://ccts.osu.edu/research-support-services/recruitment-and-retention/research-study-participant-satisfaction-survey)
- 2443 Monson, C.M., Fredman, S., MacDonalnd, A., et al. (2012). Effect of cognitive-behavioral couple  
 2444 therapy for PTSD: A randomized controlled trial. *JAMA, 308*, 700-709.
- 2445 Monson, C.M., Gradus, J.L., Young-Xu, Y., Schnurr P.P., Price, J.L., & Schumm, J.A. (2008).  
 2446 Change in posttraumatic stress disorder symptoms: Do clinicians and patient agree?  
 2447 *Psychological Assessment, 20*, 131-138.



- 2448 Monson, C.M., Schnurr, P.P., Resick, P.A., et al. (2006). A randomized controlled trial of  
2449 Cognitive Processing Therapy for veterans with military-related posttraumatic stress  
2450 disorder. *Journal of Consulting and Clinical Psychology, 74*, 898-907.
- 2451 Nacasch, N., Foa, E.B., Huppert, J.D., et al. (2011). Prolonged exposure therapy for combat-  
2452 and terror-related posttraumatic stress disorder: a randomized control comparison with  
2453 treatment as usual. *Journal of Clinical Psychiatry, 72*, 1174–1180.
- 2454 Nasreddine, Z.S., Phillips, N.A., Bedirian, V., et al. (2005). The Montreal Cognitive Assessment,  
2455 MoCA: A brief screening tool for mild cognitive impairment. *Journal of the American Geriatric  
2456 Society, 53*, 695–699.
- 2457 Pietrzak, R.H., Goldstein, R.B., Southwick, S.M., & Grant, B.F. (2011). Prevalence and axis I  
2458 comorbidity of full and partial posttraumatic stress disorder in the United States: Results  
2459 from Wave 2 of the National Epidemiologic Survey on Alcohol and Related Conditions.  
2460 *Journal of Anxiety Disorders, 25*, 456-465.
- 2461 Ramchand, R., Schell, T.L., Karney, B.R. et al. (2010). Disparate prevalence estimates of  
2462 PTSD among service members who served in Iraq and Afghanistan: Possible explanations.  
2463 *Journal of Traumatic Stress, 23*, 59-68.
- 2464 Rauch, S.A.M., Defever, E., Favorite, T., et al. (2009). Prolonged Exposure for PTSD in a  
2465 Veterans Health Administration PTSD clinic. *Journal of Traumatic Stress, 22*, 60-64.
- 2466 Resick, P.A., Galovski, T.E., Uhlmansiek, M.O., et al. (2008). A randomized clinical trial to  
2467 dismantle components of cognitive processing therapy for posttraumatic stress disorder in  
2468 female victims of interpersonal violence. *Journal of Consulting and Clinical Psychology, 76*,  
2469 243-258.
- 2470 Resick, P.A., Monson, C.M. & Chard, K.M. (2010). *Cognitive processing therapy for PTSD:  
2471 Veteran/Military version. Washington, DC: Department of Veterans Affairs.*
- 2472 Resick, P.A., Nishith, P., Weaver, T.L., et al. (2002). A comparison of cognitive-processing  
2473 therapy with prolonged exposure and a waiting condition for the treatment of chronic  
2474 posttraumatic stress disorder in female rape victims. *Journal of Consulting and Clinical  
2475 Psychology, 70*, 867-879.
- 2476 Resick, P.A., Williams, L.F., Suvak, M.K., et al. (2012). Long-term outcomes of cognitive-  
2477 behavioral treatments for posttraumatic stress disorder among female rape survivors.  
2478 *Journal of Consulting and Clinical Psychology, 80*, 201-210.
- 2479 Rizvi, S.L., Vogt, D.S., & Resick, P.A. (2009). Cognitive and affective predictors of treatment  
2480 outcome in Cognitive Processing Therapy and Prolonged Exposure for posttraumatic stress  
2481 disorder. *Behavior Research and Therapy, 47*, 737-743.
- 2482 Rogers, E.M. (2003). *Diffusion of innovations*. 5th edition. New York: Free Press.
- 2483 Rohde, P., Lewinsohn, P.M., & Seeley, J.R. (1997). Comparability of telephone and face-to-  
2484 face interviews in assessing axis I and II disorders. *American Journal of Psychiatry, 154*,  
2485 1593-1598.
- 2486 Rosetti, H.C., Lacritz, L.H., Munro Cullum, C., et al. (2011). Normative data for the Montreal  
2487 Cognitive Assessment (MoCA) in a population-based sample. *Neurology, 77*, 1272-1275.
- 2488 Rothbaum, B.O., Astin, M.C., & Marsteller, F. (2005). Prolonged Exposure versus Eye  
2489 Movement Desensitization and Reprocessing (EMDR) for PTSD rape victims. *Journal of  
2490 Traumatic Stress, 18*, 607-616.
- 2491 Sartor, C.E., Grant, J.D., Lynskey, M.T., et al. (2012). Common heritable contributions to low-  
2492 risk trauma, high-risk trauma, posttraumatic stress disorder, and major depression. *Archives  
2493 of General Psychiatry, 69*, 293-299.
- 2494 Schnurr, P.P. (2007). The rocks and hard places in psychotherapy research. *Journal of  
2495 Traumatic Stress, 20*, 779-792.
- 2496 Schnurr, P.P., Ford, J.D., Friedman, M.J., et al. (2000). Predictors and outcomes of PTSD in  
2497 World War II veterans exposed to mustard gas. *Journal of Consulting and Clinical  
2498 Psychology, 68*, 258-268.

- 2499 Schnurr, P.P., Friedman, M.J., Engel, C.C., et al. (2007). Cognitive-behavioral therapy for  
2500 posttraumatic stress disorder in women: A randomized controlled trial. *Journal of the*  
2501 *American Medical Association*, 297, 820-830.
- 2502 Schnurr, P.P., Friedman, M.J., Foy, D.W., et al. (2003). A randomized trial of trauma focus  
2503 group therapy for posttraumatic stress disorder: Results from a Department of Veterans  
2504 Affairs Cooperative Study. *Archives of General Psychiatry*, 60, 481-489.
- 2505 Schnurr, P.P., Friedman, M.J., Lavori, P.J., et al. (2001). Design of VA Cooperative Study #420:  
2506 Group treatment of PTSD. *Controlled Clinical Trials*, 22, 74-88.
- 2507 Schnurr, P.P., Friedman, M.J., Oxman, T.E., et al. (2013). RESPECT-PTSD: Reengineering  
2508 systems for the primary care treatment of PTSD, a randomized controlled trial. *Journal of*  
2509 *General Internal Medicine*, 28, 32-40.
- 2510 Schnurr, P.P., Lunney, C.A., Bovin, M.J., et al. (2009). Posttraumatic stress disorder and quality  
2511 of life: Extension of findings to veterans of the wars in Iraq and Afghanistan. *Clinical*  
2512 *Psychology Review*, 29, 727-735.
- 2513 Schnurr, P.P., Spiro, A. III, Vielhauer, M.J., et al. (2002). Trauma in the lives of older men:  
2514 Findings from the Normative Aging Study. *Journal of Clinical Geropsychology*, 8, 175-187.
- 2515 Shalev, A.Y., Ankri, Y.L.E., Israeli-Shalev, Y., et al. (2012). Prevention of posttraumatic stress  
2516 disorder by early treatment: Results from the Jerusalem Trauma Outreach and Prevention  
2517 Study. *Archives of General Psychiatry*, 69, 166-176.
- 2518 Spielberger, C.D. (1988). *State-Trait Anger Expression Inventory*. Odessa, FL: Psychological  
2519 Assessment Resources.
- 2520 Stanley, B., & Brown, G.K. (2008). *Safety plan treatment manual to reduce suicide risk: Veteran*  
2521 *version*. Washington, DC: Department of Veterans Affairs.
- 2522 Steenbarger, B.N. (1994). Duration and outcome in psychotherapy: An integrative review.  
2523 *Professional Psychology: Research and Practice*, 25, 111-119.
- 2524 Stein, N. R., Mills, M. A., Arditte, K., et al. & the STRONG STAR Consortium. (2012). A scheme  
2525 for categorizing traumatic military events. *Behavior Modification*, 36, 785-805.
- 2526 Tanelian, T., & Jaycox, L.H. (Eds). (2008). *Invisible wounds of war: Psychological and cognitive*  
2527 *injuries, their consequences, and services to assist recovery*. Santa Monica, CA: RAND.
- 2528 VA Northeast Program Evaluation Center. (2012). *PTSD Fact Sheet, FY 2011*. West Haven,  
2529 CT: Author.
- 2530 van Minnen, A. (2012). Don't be afraid of the big bad wolf: Prolonged Exposure therapy for  
2531 PTSD patients with severe comorbidity. Keynote address presented at the Dutch Cognitive  
2532 Behavioral Therapy conference, Veldhoven, The Netherlands.
- 2533 van Minnen, A., & Foa, E.B. (2006). The effect of imaginal exposure length on outcome of  
2534 treatment for PTSD. *Journal of Traumatic Stress*, 19, 427-438.
- 2535 van Minnen, A., Hendriks, L., & Olf, M. (2010). When do trauma experts choose exposure  
2536 therapy for PTSD patients? A controlled study of therapist and patient factors. *Behaviour*  
2537 *Research and Therapy*, 48, 312-320.
- 2538 Veterans Benefits Association (2012). *Annual benefits report: Fiscal year 2011*. Washington,  
2539 DC: Department of Veterans Affairs.
- 2540 Vogt, D. (ongoing). "Gender, Stigma, and Other Barriers to VHA Use for OEF/OIF Veterans." D.  
2541 Vogt, Principal Investigator. VA HSR&D Merit Review.
- 2542 Wang, P.S., Berglund, P., Olfson, M., et al. (2005). Failure and delay in initial treatment contact  
2543 after first onset of mental disorders I the National Comorbidity Survey Replication. *Archives*  
2544 *of General Psychiatry*, 62, 603-613.
- 2545 Watts, B.V., & Schnurr, P.P. (ongoing). "Decision Aid for Veterans with PTSD." V. Watts & P.P.  
2546 Schnurr, co-Principal Investigators. VA HSR&D Merit Review.
- 2547 Watts, B.V., Schnurr, P.P., Mayo, L., et al. (2012). *Meta-analysis of the efficacy of treatments for*  
2548 *posttraumatic stress disorder*. Manuscript submitted for publication.

2549 Weathers, F.W., Keane, T.M., & Davidson, J.R.T. (2001). The Clinician-Administered PTSD  
2550 Scale: A review of the first ten years of research. *Depression and Anxiety*, 13, 132-156.  
2551 Weathers, F.W., Litz, B.T., Herman, D.S., et al. (November, 1993). *PTSD Checklist: reliability,*  
2552 *validity, and diagnostic utility*. Paper presented at the 9th Annual Meeting of the International  
2553 Society for Traumatic Stress Studies, Chicago, IL.  
2554 World Health Organization (1996). *WHOQOL-BREF: Introduction, administration, coding, and*  
2555 *generic version of the assessment*. Geneva, Switzerland: Author.  
2556 World Health Organization (2000). *WHODAS-II training manual: A guide to administration*.  
2557 Geneva, Switzerland: Author.  
2558 Yoder, M., Tuerk, P.W., Price, M., et al. (2012). Prolonged Exposure therapy for combat-related  
2559 posttraumatic stress disorder: Comparing outcomes for veterans of different wars.  
2560 *Psychological Services*, 9, 16-25.  
2561

2562

2563

2564

2565

2566

2567

2568

2569

2570

2571

2572

2573

2574

This page intentionally left blank.

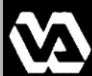

Department of Veterans Affairs

**RESEARCH CONSENT FORM***Version Date: October 13, 2017*

Participant Name: \_\_\_\_\_ Date: \_\_\_\_\_

Title of Study: Comparative Effectiveness Research in Veterans with PTSD (CERV-PTSD)

Principal Investigator: \_\_\_\_\_ VA Facility: \_\_\_\_\_

Principal Investigator for Multisite Study: Paula P. Schnurr, PhD**2575 INTRODUCTION**

2576 You are being invited to take part in a research study that is funded by the Department  
 2577 of Veterans Affairs. Before you decide to take part, it is important for you to know why  
 2578 the research is being done and what it will involve. This includes any potential risks to  
 2579 you, as well as any potential benefits you might receive.

2580 Read the information below carefully, and discuss it with family and friends if you wish.  
 2581 Ask one of the study staff if there is anything that is not clear or if you would like more  
 2582 details. Take your time to decide. If you do decide to take part, your signature on this  
 2583 consent form will show that you received all of the information below, and that you were  
 2584 able to discuss any questions and concerns you had with a member of the study team.

**2585 BACKGROUND AND PURPOSE****2586 WHY IS THIS RESEARCH BEING DONE?**

2587 The purpose of this research study is to compare two types of individual therapies for  
 2588 the symptoms of Posttraumatic Stress Disorder (PTSD). One of the treatments is  
 2589 Prolonged Exposure (PE) and the other is Cognitive Processing Therapy (CPT). Both  
 2590 therapies are routinely used in the VA and have been found to be effective with  
 2591 Veterans in prior studies. However, the two therapies have never been compared to one  
 2592 another in Veterans.

2593 PE involves learning a method of dealing with traumatic memories and stressful  
 2594 situations to help you overcome the distress in a safe manner. The other treatment,  
 2595 CPT, looks at the impact the traumatic event has had on your life and helps you to  
 2596 examine and change your unhelpful thoughts and feelings related to the event, yourself,  
 2597 others and the world. The purpose of this research study is to compare the  
 2598 effectiveness of these two therapies on PTSD symptoms, along with related symptoms  
 2599 such as depression and anxiety, to see which treatment is better. The study will also try  
 2600 to determine if there are people who respond better to one treatment or the other.

**SUBJECT'S IDENTIFICATION**

VA Form **10-10-86**  
 MAR 2006

VA CENTRAL IRB APPROVAL STAMP

*VA Central IRB Template October 5, 2011***Page 1 of 14**



Department of Veterans Affairs

**RESEARCH CONSENT FORM***Version Date: October 13, 2017*

Participant Name: \_\_\_\_\_ Date: \_\_\_\_\_

Title of Study: Comparative Effectiveness Research in Veterans with PTSD (CERV-PTSD)

Principal Investigator: \_\_\_\_\_ VA Facility: \_\_\_\_\_

Principal Investigator for Multisite Study: Paula P. Schnurr, PhD

2601

2602 **WHY HAVE YOU BEEN ASKED TO TAKE PART IN THIS RESEARCH STUDY?**

2603 You are being asked to take part in this research study because you are over 18 and  
 2604 you may have PTSD. PTSD is a psychological disorder in some people who have had a  
 2605 trauma experience such as combat, sexual abuse, physical abuse, or natural disasters.

2606 **WHO IS CONDUCTING THE RESEARCH STUDY?**

2607 This study is sponsored by the Department of Veterans Affairs. The study is directed by  
 2608 Paula P. Schnurr PhD, a researcher at the White River Junction VA Medical Center.  
 2609 Co-directors are Kathleen M. Chard, PhD at the Cincinnati VA Medical Center and Josef  
 2610 Ruzek, PhD at the Palo Alto VA. They are assisted by staff at the White River Junction  
 2611 VA Medical Center, the Palo Alto VA Cooperative Studies Program Coordinating Center  
 2612 (CSPCC), the Boston VA Medical Center, and your local VA hospital.

2613 **HOW MANY PEOPLE WILL TAKE PART IN THE RESEARCH STUDY?**

2614 The CERV-PTSD study team at your medical center will ask Veterans like you to  
 2615 provide consent to participate in this research study. Study participation involves two  
 2616 parts. The first part is to go through screening procedures that will determine if you are  
 2617 eligible to receive PTSD therapy (PE or CPT) as part of the study. The second part of  
 2618 study participation is randomization to either PE or CPT treatment (“randomization” is  
 2619 described below in “Study Procedures”) and post-treatment follow-up. Not everybody  
 2620 who signs a consent form and goes through screening will qualify and receive PTSD  
 2621 therapy. We expect that approximately half of the participants will be eligible to receive  
 2622 study treatment. Up to 2550 Veterans at 17 or more VA sites across the country will be  
 2623 enrolled in this study, with up to 150 participants enrolled at each site.

2624 **DURATION OF THE RESEARCH**

2625 The study will last four years, but you will be in the research study for approximately one  
 2626 year.

**SUBJECT'S IDENTIFICATION**

VA Form **10-10-86**  
 MAR 2006

VA CENTRAL IRB APPROVAL STAMP

VA Central IRB Template October 5, 2011

**Page 2 of 14**



Department of Veterans Affairs

**RESEARCH CONSENT FORM***Version Date: October 13, 2017*

Participant Name: \_\_\_\_\_ Date: \_\_\_\_\_

Title of Study: Comparative Effectiveness Research in Veterans with PTSD (CERV-PTSD)

Principal Investigator: \_\_\_\_\_ VA Facility: \_\_\_\_\_

Principal Investigator for Multisite Study: Paula P. Schnurr, PhD2627 **STUDY PROCEDURES**2628 **WHAT IS INVOLVED IN THE RESEARCH STUDY?**

2629 On your first visit you will be asked some questions to find out if you might be eligible for  
 2630 the study. The questions include background information and questions about your  
 2631 current mood and how you are coping. If it seems you are eligible for the study, you will  
 2632 fill out some additional paper-and-pencil questionnaires about PTSD, depression,  
 2633 anger, health and general well-being.

2634 After this visit an assessor located in Boston or Long Beach will contact you by  
 2635 telephone for a clinical interview designed to determine if you have PTSD and other  
 2636 related symptoms. You also will be asked about your preferences for treatment, but this  
 2637 will not affect which treatment you receive. You do not need to return to the VA for this  
 2638 interview. However, if you do not have access to a phone you must agree to come to  
 2639 the local VA clinic for the phone interview. This phone call interview will take between  
 2640 two and four hours and can be done in two sessions. After this assessment it will be  
 2641 decided if you are eligible to participate in the study.

2642 To be eligible for the study you must meet the following criteria:

- 2643 • be enrolled in the VA system and referred to the study by a VA staff  
 2644 member,
- 2645 • be a Veteran with a current diagnosis of PTSD due to any trauma during  
 2646 your military service,
- 2647 • agree to be placed in either treatment (PE or CPT),
- 2648 • agree to not receive other psychotherapy or counseling for PTSD while  
 2649 you are receiving therapy as part of this study,
- 2650 • agree to let us access your medical record so we can learn about how  
 2651 much you are using VA services before and during the study,
- 2652 • have regular access to a telephone or agree to come into the VA clinic for  
 2653 telephone interviews,

**SUBJECT'S IDENTIFICATION**

VA Form **10-10-86**  
 MAR 2006

VA CENTRAL IRB APPROVAL STAMP

VA Central IRB Template October 5, 2011

**Page 3 of 14**

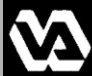

Department of Veterans Affairs

**RESEARCH CONSENT FORM**

*Version Date: October 13, 2017*

Participant Name: \_\_\_\_\_ Date: \_\_\_\_\_

Title of Study: Comparative Effectiveness Research in Veterans with PTSD (CERV-PTSD)

Principal Investigator: \_\_\_\_\_ VA Facility: \_\_\_\_\_

Principal Investigator for Multisite Study: Paula P. Schnurr, PhD

- 2654                   • agree to have your telephone interviews and treatment sessions recorded,  
 2655                   and  
 2656                   • be at least eighteen years of age.  
 2657

2658           If more than 30 days go by between this telephone interview and your first study therapy  
 2659           session, you will be asked to re-do part of this interview. While receiving therapy as part  
 2660           of the study, you will be allowed to attend self-help groups, have brief check-in visits  
 2661           with any therapist or counselor you have now, seek treatment for substance abuse and  
 2662           mental health problems other than PTSD, and take medication for PTSD and other  
 2663           mental or physical conditions.

2664           You will not be eligible for the study if you (1) have any current psychotic symptoms, (2)  
 2665           have plans to harm yourself or someone else or are making plans to do so, (3) have  
 2666           mania that is not in remission, (4) have current drug or alcohol dependence, or (5) show  
 2667           severe problems with memory or other problems with thinking and reasoning. If you are  
 2668           currently dependent on drugs or alcohol you will be referred to an appropriate clinic.  
 2669           You will be considered for the study one month after you are no longer dependent on  
 2670           drugs or alcohol. If you are currently suicidal or homicidal with intent and a plan we will  
 2671           help you obtain mental health care and you may be eligible for the study at a later time.

2672           If you are eligible for the study you will be "randomized" into one of the two treatments  
 2673           described below. Randomization means that you are put into one treatment or the other  
 2674           completely by chance. It is like flipping a coin. If you take part in the study, you will be  
 2675           assigned to either PE or CPT with a trained therapist. You will have the same therapist  
 2676           for the entire study. Both therapies are commonly used in the clinical care of PTSD.  
 2677           They both involve 10-14 sessions that last 90 minutes in PE or 60 minutes in CPT.  
 2678           Sessions will be scheduled weekly, although you may attend some sessions more than  
 2679           once a week or skip a week (for a scheduling conflict, for example). You and your  
 2680           therapist will determine what frequency works best for you. Both therapies require  
 2681           practice assignments between sessions. At each session you will be asked to fill in two  
 2682           paper-and-pencil questionnaires.

SUBJECT'S IDENTIFICATION

VA Form **10-10-86**  
 MAR 2006

VA CENTRAL IRB APPROVAL STAMP

*VA Central IRB Template October 5, 2011*

**Page 4 of 14**





Department of Veterans Affairs

**RESEARCH CONSENT FORM**

Version Date: *October 13, 2017*

Participant Name: \_\_\_\_\_ Date: \_\_\_\_\_

Title of Study: Comparative Effectiveness Research in Veterans with PTSD (CERV-PTSD)

Principal Investigator: \_\_\_\_\_ VA Facility: \_\_\_\_\_

Principal Investigator for Multisite Study: Paula P. Schnurr, PhD

2683 The schedule for study assessments will be as follows:

|                                      | Enrollment (On-site) | Baseline (Phone) | Therapy (8-14 weekly sessions) | Mid-treatment (Phone) | Post-treatment (Phone) | Post-Treatment (On-site) | 3 months post-treatment (Phone) | 3 months post-treatment (On-site) | 6 months post-treatment (Phone) | 6 months post-treatment (On-site) |
|--------------------------------------|----------------------|------------------|--------------------------------|-----------------------|------------------------|--------------------------|---------------------------------|-----------------------------------|---------------------------------|-----------------------------------|
| PTSD symptom questionnaires          |                      | X                | X                              | X                     | X                      |                          | X                               |                                   | X                               |                                   |
| General mental health questionnaires | X                    | X                | X                              |                       |                        | X                        |                                 | X                                 |                                 | X                                 |
| Life history questionnaires          | X                    | X                |                                |                       |                        |                          |                                 |                                   |                                 |                                   |
| Mood questionnaires                  | X                    |                  |                                |                       |                        | X                        |                                 |                                   |                                 | X                                 |
| End of study forms                   |                      |                  |                                |                       |                        | X                        |                                 |                                   |                                 | X                                 |

2684

2685 Halfway through your study treatment sessions, you will receive a telephone clinical  
 2686 interview that lasts about 1.5 hours. Within one week after the end of therapy you will  
 2687 be asked to come to the VA clinic for a post-treatment follow-up and have another  
 2688 telephone interview. You will also be asked to return for a follow-up assessment and  
 2689 complete phone interviews three and six months after you complete the treatment. The  
 2690 post-treatment and follow-up assessments will include all of the measures you filled in

**SUBJECT'S IDENTIFICATION**

VA Form **10-10-86**  
 MAR 2006

VA CENTRAL IRB APPROVAL STAMP

VA Central IRB Template October 5, 2011

**Page 5 of 14**



Department of Veterans Affairs

**RESEARCH CONSENT FORM**

*Version Date: October 13, 2017*

Participant Name: \_\_\_\_\_ Date: \_\_\_\_\_

Title of Study: Comparative Effectiveness Research in Veterans with PTSD (CERV-PTSD)

Principal Investigator: \_\_\_\_\_ VA Facility: \_\_\_\_\_

Principal Investigator for Multisite Study: Paula P. Schnurr, PhD

2691 on your first visit, with the exception of the general background questions. These visits  
 2692 will last one to two hours for the questionnaires in the clinic and about 1.5 hours for the  
 2693 telephone interviews. If you do not have access to a telephone we will ask you to come  
 2694 into the VA clinic for the telephone interview. This part of the study happens over the  
 2695 phone to make sure that the clinicians asking you certain types of questions are  
 2696 “blinded” – that is, that they do not know which treatment you were assigned to.

2697 All treatment and questionnaire assessments will take place at your local VA. The  
 2698 interviews will be conducted on the telephone. All assessments will be digitally recorded  
 2699 and all therapy sessions will also be digitally recorded to ensure the quality of services  
 2700 being provided to you. You are free to skip any questions on any of the paper-and-  
 2701 pencil questionnaires that you would prefer not to answer. If you miss any of the  
 2702 treatment and questionnaire assessments the site coordinator will try to reschedule  
 2703 them by contacting you initially by phone (up to 5 times) and then by mail with a letter.  
 2704 If you are unable to attend a follow-up assessment at your local VA (for example, if you  
 2705 move out of the area), you may choose to complete some questionnaires by mail  
 2706 instead of in person). The site coordinator will contact you by phone prior to sending the  
 2707 study questionnaires by mail.  
 2708

2709 You will meet with several people as part of your research participation, including your  
 2710 study-assigned therapist, local site coordinator, and telephone assessor. Your local site  
 2711 coordinator will explain the potential risks and benefits of your participation. Study staff  
 2712 including the leaders of the project and your local site coordinator will monitor your  
 2713 treatment and whether undesirable events result from your participation. They will also  
 2714 alert you if there is a problem with the treatment. Your therapist will provide your PTSD  
 2715 therapy and also document your clinical course while you receive the treatment.  
 2716 If you decide to participate in the research study, it will be your responsibility to:

- 2717 ○ Attend scheduled treatment sessions
- 2718 ○ Attend scheduled assessment appointments, and contact the site
- 2719 investigator or research staff to reschedule as soon as you know you will
- 2720 miss the appointment.

**SUBJECT'S IDENTIFICATION**

VA Form **10-10-86**  
 MAR 2006

VA CENTRAL IRB APPROVAL STAMP

*VA Central IRB Template October 5, 2011*

**Page 6 of 14**



Department of Veterans Affairs

**RESEARCH CONSENT FORM**

Version Date: October 13, 2017

Participant Name: \_\_\_\_\_ Date: \_\_\_\_\_

Title of Study: Comparative Effectiveness Research in Veterans with PTSD (CERV-PTSD)

Principal Investigator: \_\_\_\_\_ VA Facility: \_\_\_\_\_

Principal Investigator for Multisite Study: Paula P. Schnurr, PhD

- 2721 ○ Participate in the PTSD treatment process and complete treatment tasks
- 2722 as discussed with your therapist.
- 2723 ○ Fill out your practice assignment forms as instructed.
- 2724 ○ Complete your questionnaires as instructed.
- 2725 ○ Ask questions as you think of them.
- 2726 ○ Tell the site investigator or research staff if you change your mind about
- 2727 staying in the study.
- 2728 ○ Not take part in any other research project without discussion with the
- 2729 research staff. Taking part in another research study without first
- 2730 discussing it with the investigators of this study may invalidate the results
- 2731 of both research studies..
- 2732

2733 **POSSIBLE RISKS OR DISCOMFORTS**

2734 **WHAT ARE THE RISKS AND DISCOMFORTS OF THE RESEARCH STUDY?**

2735 It is possible that during the assessments or therapy sessions you may feel some  
 2736 increase in unpleasant emotions while recalling and describing the traumatic event.  
 2737 Because you have PTSD you may have been trying to block or avoid thoughts and  
 2738 feelings. The goal of PE and CPT is to have you feel less stress and other painful  
 2739 emotions related to the traumatic event. We expect that any distress you may  
 2740 experience will be temporary. However it is possible that your condition may worsen. If  
 2741 at any time you are feeling overwhelmed or upset you may call the study staff between  
 2742 the hours of 8:00 AM and 4:00 PM, come to the main VA emergency room to be seen  
 2743 by a mental health professional, or call the Veterans Crisis Hotline at 1-800-273-8255.

2744 If any significant new findings develop during the study that relate to your willingness to  
 2745 continue, you will be informed.

2746 Risks of the usual care you receive (PE or CPT therapy for your PTSD) are not risks of  
 2747 the research. Those risks are not included in this consent form. You should talk with  
 2748 your health care providers if you have any questions about the risks of usual care.

SUBJECT'S IDENTIFICATION

VA Form **10-10-86**  
 MAR 2006

VA CENTRAL IRB APPROVAL STAMP

VA Central IRB Template October 5, 2011

**Page 7 of 14**



Department of Veterans Affairs

**RESEARCH CONSENT FORM**

*Version Date: October 13, 2017*

Participant Name: \_\_\_\_\_ Date: \_\_\_\_\_

Title of Study: Comparative Effectiveness Research in Veterans with PTSD (CERV-PTSD)

Principal Investigator: \_\_\_\_\_ VA Facility: \_\_\_\_\_

Principal Investigator for Multisite Study: Paula P. Schnurr, PhD

2749 **WHAT ARE THE RISKS OF STOPPING YOUR CURRENT TREATMENT?**

2750 The only risk to stopping your current therapy is the discomfort you may feel at  
 2751 changing from one therapist to another. You may have some discomfort with  
 2752 discontinuing your current treatment, but brief check-ins with your current therapist will  
 2753 be allowed.

2754 **ARE THERE BENEFITS TO TAKING PART IN THE RESEARCH STUDY?**

2755 If you agree to take part in this research study, there may not be a direct benefit to you.  
 2756 The investigators hope the information learned from this research study will benefit you  
 2757 and other Veterans with PTSD in the future. Potential benefits to you may include a  
 2758 reduction in your PTSD symptoms over the course of therapy. The knowledge gained  
 2759 from this study will serve to guide future research and clinical care for Veterans. For  
 2760 society in general, this study will provide useful information regarding treatment  
 2761 effectiveness, recovery from trauma, and long-term benefits of therapeutic interventions.

2762 **ALTERNATIVES TO PARTICIPATING IN THIS RESEARCH**

2763 **WHAT OTHER CHOICES FOR CARE ARE THERE?**

2764 PE and CPT are not investigational therapies. Both of these PTSD treatments have  
 2765 been found to be effective in past studies and they are available to you even if you  
 2766 decide not to participate in this study. This research study will compare the two  
 2767 treatments to one another.

2768 Instead of being in this research study, you have these options:

2769 If you have PTSD you may request PE, CPT, or other types of PTSD treatment based  
 2770 on VA guidelines and availability at your local VA or Vet Center. If you do not have  
 2771 PTSD you may contact the mental health clinic at your local VA or Vet Center to discuss  
 2772 your eligibility for other services.

2773

SUBJECT'S IDENTIFICATION

VA Form **10-10-86**  
 MAR 2006

|                                                                                                                       |
|-----------------------------------------------------------------------------------------------------------------------|
| <p>VA CENTRAL IRB APPROVAL STAMP</p> <p><i>VA Central IRB Template October 5, 2011</i></p> <p><b>Page 8 of 14</b></p> |
|-----------------------------------------------------------------------------------------------------------------------|



Department of Veterans Affairs

**RESEARCH CONSENT FORM***Version Date: October 13, 2017*

Participant Name: \_\_\_\_\_ Date: \_\_\_\_\_

Title of Study: Comparative Effectiveness Research in Veterans with PTSD (CERV-PTSD)

Principal Investigator: \_\_\_\_\_ VA Facility: \_\_\_\_\_

Principal Investigator for Multisite Study: Paula P. Schnurr, PhD2774 **CONFIDENTIALITY**2775 **HOW WILL INFORMATION ABOUT YOU BE KEPT PRIVATE AND CONFIDENTIAL?**

2776 The information collected for this study will be kept confidential. We will include  
 2777 information about your study participation in your medical record. There are times when  
 2778 we might have to show your records to other people. For example, someone from the  
 2779 Office of Human Research Protections, the Government Accountability Office, the Office  
 2780 of the Inspector General, the VA Office of Research Oversight, the VA Central IRB, our  
 2781 local Research and Development Committee, and other study monitors may look at or  
 2782 copy portions of records that identify you.

2783 The data from the study may be published; however, you will not be identified by name.  
 2784 All data will be identified by code number. These data will be stored in locked file  
 2785 cabinets that will be accessible only to project staff.

2786 The key listing names and code numbers will be kept in a separate locked filing cabinet  
 2787 or separate secure computer drive. Destruction of all research records pertaining to this  
 2788 study will be in accordance with the Department of Veterans Affairs record retention  
 2789 schedule. The electronic recordings of the assessments and sessions will be stored in  
 2790 the VA system with password protection.

2791 Your information will be combined with information from other people taking part in the  
 2792 study. We will write about the combined information we have gathered. Any talks or  
 2793 papers from this study will not identify you.

2794 If you are a VA patient, you already have a VA medical record. If you are not a current  
 2795 VA patient, we will create a VA medical record for you. Also, the VA Cooperative  
 2796 Studies Program requires us to collect Social Security Numbers (SSNs) from everyone  
 2797 who participates in this study in case there is new information about this study in the  
 2798 future that needs to be told to the participants. You will not be able to participate in this  
 2799 study unless you give us your SSN.

**SUBJECT'S IDENTIFICATION**

VA Form **10-10-86**  
 MAR 2006

VA CENTRAL IRB APPROVAL STAMP

VA Central IRB Template October 5, 2011

**Page 9 of 14**



Department of Veterans Affairs

**RESEARCH CONSENT FORM**

*Version Date: October 13, 2017*

Participant Name: \_\_\_\_\_ Date: \_\_\_\_\_

Title of Study: Comparative Effectiveness Research in Veterans with PTSD (CERV-PTSD)

Principal Investigator: \_\_\_\_\_ VA Facility: \_\_\_\_\_

Principal Investigator for Multisite Study: Paula P. Schnurr, PhD

2800 We will put the following information about you from this study into your medical record:  
 2801 A note that you are receiving one of the treatments and the session you are on, and the  
 2802 PTSD Checklist that you will fill out each session. This electronic record will be kept for  
 2803 75 years after your last contact with us. All authorized users in the national VA system  
 2804 can have access to your medical record. We will also collect demographic information  
 2805 and VA services that you have received from your medical record.

2806 By signing this document, you authorize the Veterans Health Administration (VHA) to  
 2807 permit (insert name of Site Investigator) and his or her research team to use and  
 2808 disclose the following information about you and to contact and discuss your research  
 2809 activities with your referring VA clinician to mutually address any clinical needs:

- 2810 • Information about you that is created during the research study. This  
 2811 includes the number of times you have used VA services, the results of  
 2812 diagnostic exams that become part of the study records, and information  
 2813 collected as part of interviews you have with the study staff and  
 2814 questionnaires you fill out during the study.
- 2815 • Information in your medical record that is needed for this research study.  
 2816 This might include the results of past physical exams, diagnostic  
 2817 interviews, lists of medications you are currently taking, diagnostic  
 2818 procedures and your medical, social, and psychiatric history.

2820 **WHAT IS A CERTIFICATE OF CONFIDENTIALITY?**

2821 To further protect your privacy, the investigators have obtained a Certificate of  
 2822 Confidentiality from the Department of Health and Human Services (DHHS).

2823 This helps protect your privacy by allowing us to refuse to release your name or other  
 2824 information outside of the research study, even by a court order. The Certificate of  
 2825 Confidentiality will not be used to prevent disclosures to local authorities of child abuse  
 2826 and neglect, elder abuse or neglect, or harm to self or others. The Certificate does not

SUBJECT'S IDENTIFICATION

VA Form **10-10-86**  
 MAR 2006

VA CENTRAL IRB APPROVAL STAMP

VA Central IRB Template October 5, 2011

**Page 10 of 14**



Department of Veterans Affairs

**RESEARCH CONSENT FORM**

*Version Date: October 13, 2017*

Participant Name: \_\_\_\_\_ Date: \_\_\_\_\_

Title of Study: Comparative Effectiveness Research in Veterans with PTSD (CERV-PTSD)

Principal Investigator: \_\_\_\_\_ VA Facility: \_\_\_\_\_

Principal Investigator for Multisite Study: Paula P. Schnurr, PhD

2827 prevent you or your family from releasing data about yourself or your involvement in this  
2828 study.

2829 A description of this clinical trial will be available on <http://www.ClinicalTrials.gov> as  
2830 required by U.S. Law. This website will not include information that can identify you. At  
2831 most, the website will include a summary of the results. You can search this website at  
2832 any time.

2833 **COSTS TO PARTICIPANTS AND PAYMENT**

2834 **WHAT ARE YOUR COSTS TO BE IN THIS STUDY?**

2835 There are no costs for your participation in the study. All study therapy is free of charge  
2836 to study participants. Department of Veterans Affairs patients may be financially  
2837 responsible for non-study related care at the Department of Veterans Affairs. Some  
2838 Veterans are required to pay co-payments for medical care and services; these co-  
2839 payment requirements will continue to apply to medical care and services provided by  
2840 the Department of Veterans Affairs that are not part of this study.

2841

2842 **WILL YOU BE PAID TO PARTICIPATE IN THIS RESEARCH STUDY?**

2843 You will be paid \$30 for the screening. If it seems you are eligible for the study, you will  
2844 be paid \$20 for the baseline questionnaire measures before treatment and \$50 for the  
2845 initial telephone interview. You will receive \$50 for the telephone interview during  
2846 treatment and \$75 for the phone interview and questionnaires at the end of treatment.  
2847 At the three month follow-up, you will receive \$85, and at the final assessment at 6  
2848 months, you will receive \$100. Payments will be either in cash, gift card or check  
2849 depending on the rules for each VA hospital in the study. If you receive payments for  
2850 being a part of this research study, you may be asked to complete an Internal Revenue  
2851 Service (IRS) form. The amount you receive may count as income and may affect your  
2852 income taxes. Your social security number may be required to complete the IRS 1099  
2853 form. You will also be reimbursed for travel over 50 miles.

SUBJECT'S IDENTIFICATION

VA Form **10-10-86**  
MAR 2006

VA CENTRAL IRB APPROVAL STAMP

VA Central IRB Template October 5, 2011

**Page 11 of 14**



Department of Veterans Affairs

**RESEARCH CONSENT FORM**

Version Date: October 13, 2017

Participant Name: \_\_\_\_\_ Date: \_\_\_\_\_

Title of Study: Comparative Effectiveness Research in Veterans with PTSD (CERV-PTSD)

Principal Investigator: \_\_\_\_\_ VA Facility: \_\_\_\_\_

Principal Investigator for Multisite Study: Paula P. Schnurr, PhD

2854 **MEDICAL TREATMENT AND COMPENSATION FOR INJURY**

2855 **WHAT COMPENSATION IS AVAILABLE IN CASE OF INJURY?**

2856 Every reasonable safety measure will be used to protect your well-being. If you are  
 2857 injured as a result of taking part in this study, the VA will provide necessary medical  
 2858 treatment at no cost to you unless the injury was due to your not following the study  
 2859 procedures. Financial compensation is not available for such things as lost wages,  
 2860 disability or discomfort due to an injury. The Department of Veterans Affairs does not  
 2861 normally provide any other form of compensation for injury. You have not released this  
 2862 institution from liability for negligence.

2863 If you should have a medical concern or get hurt or sick as a result of taking part in this  
 2864 study, call: *(List local site contacts)*

2865 **DURING THE DAY:**

2866

2867 Dr./Mr./Ms. \_\_\_\_\_ at \_\_\_\_\_ and

2868 **AFTER HOURS:**

2869 Dr. /Mr./Ms. \_\_\_\_\_ at \_\_\_\_\_.

2870 Emergency and ongoing medical treatment will be provided as needed.

2871 You do not give up any of your legal rights and you do not release the VA from any  
 2872 liability by signing this form.

2873 **PARTICIPATION IS VOLUNTARY**

2874 It is up to you to decide whether or not to take part in this study. If you decide to take  
 2875 part you may still withdraw at any time. If you do not wish to be in this study or decide  
 2876 to leave the study early, you will not lose any benefits to which you are entitled. If you

**SUBJECT'S IDENTIFICATION**

VA Form **10-10-86**  
 MAR 2006

VA CENTRAL IRB APPROVAL STAMP

VA Central IRB Template October 5, 2011

**Page 12 of 14**





Department of Veterans Affairs

**RESEARCH CONSENT FORM**

*Version Date: October 13, 2017*

Participant Name: \_\_\_\_\_ Date: \_\_\_\_\_

Title of Study: Comparative Effectiveness Research in Veterans with PTSD (CERV-PTSD)

Principal Investigator: \_\_\_\_\_ VA Facility: \_\_\_\_\_

Principal Investigator for Multisite Study: Paula P. Schnurr, PhD

2877 do not take part, you can still receive all usual care that is available to you. Your  
 2878 decision not to take part will not affect the relationship you have with your doctor or  
 2879 other staff, and it will not affect the usual care that you receive as a patient.

2880 If you decide to withdraw from therapy you will be asked to complete remaining  
 2881 assessments, but again, this is voluntary and you will not be penalized for declining. If  
 2882 you withdraw from the study, data that has already been collected as part of the study  
 2883 can be utilized by the study team, but no future data will be collected without your  
 2884 permission.

**2885 RIGHT OF INVESTIGATOR TO TERMINATE PARTICIPATION**

2886 The investigative team may terminate your participation in the study if they believe it is  
 2887 in your best interest or if you are not following study requirements for treatment or  
 2888 assessments. If so, your therapist will explain the reasons and arrange for your usual  
 2889 medical care to continue. Termination from the study will not affect the relationship you  
 2890 have with your doctor or other staff, and it will not affect the usual care that you receive  
 2891 as a patient.

**2892 PERSONS TO CONTACT ABOUT THIS STUDY**

**2893 WHO DO YOU CALL IF YOU HAVE QUESTIONS OR PROBLEMS?**

2894 If you have any questions regarding this study, if you experience side effects or want to  
 2895 report a research-related injury or illness, or if you have any additional concerns or  
 2896 complaints while you are participating in this study, you can contact the site investigator  
 2897 [insert SI name here] at [(xxx) xxx-xxxx].

2898 If you have questions about your rights as a study participant, or you want to make sure  
 2899 this is a valid VA study, you may contact the VA Central Institutional Review Board  
 2900 (IRB). This is the Board that is responsible for overseeing the safety of participants in  
 2901 this study. You may call the VA Central IRB toll free at 1-877-254-3130 if you have

SUBJECT'S IDENTIFICATION

VA Form **10-10-86**  
 MAR 2006

VA CENTRAL IRB APPROVAL STAMP

VA Central IRB Template October 5, 2011

**Page 13 of 14**



Department of Veterans Affairs

RESEARCH CONSENT FORM

Version Date: October 13, 2017

Participant Name: \_\_\_\_\_ Date: \_\_\_\_\_

Title of Study: Comparative Effectiveness Research in Veterans with PTSD (CERV-PTSD)

Principal Investigator: \_\_\_\_\_ VA Facility: \_\_\_\_\_

Principal Investigator for Multisite Study: Paula P. Schnurr, PhD

2902 questions, complaints or concerns about the study or if you would like to obtain  
2903 information or offer input.

2904 To report complaints or concerns to an independent agency in an anonymous and  
2905 confidential manner, please call the Research Compliance Hotline at 1-800-889-1547.

2906 **SIGNIFICANT NEW FINDINGS**

2907 Sometimes during the course of a research study, new information becomes available  
2908 about the therapies being studied that might change a person's decision to stay in the  
2909 study. If this happens, your therapist will tell you about it and discuss with you whether  
2910 you want to continue in the study. If you decide to withdraw from the study, your  
2911 therapist will arrange for your mental health care to continue. If you decide to continue  
2912 in the study, you might be asked to sign an updated informed consent form.

2913 **AGREEMENT TO PARTICIPATE IN THE RESEARCH STUDY**

2914 [insert SI name here] or a member of his/her research team has explained the research  
2915 study to you. You have been told of the risks or discomforts and possible benefits of the  
2916 study. You have been told of other choices of treatment available to you. You have  
2917 been given the chance to ask questions and obtain answers.

2918 You voluntarily consent to participate in this study. You also confirm that you have read  
2919 this consent, or it has been read to you. You will receive a copy of this consent after  
2920 you sign it.

**I agree to participate in this research study as has been explained in this document.**

SUBJECT'S IDENTIFICATION

VA Form **10-10-86**  
MAR 2006

VA CENTRAL IRB APPROVAL STAMP

VA Central IRB Template October 5, 2011

**Page 14 of 14**

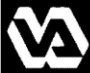

**Department of Veterans Affairs**

**RESEARCH CONSENT FORM**

*Version Date: October 13, 2017*

Participant Name: \_\_\_\_\_ Date: \_\_\_\_\_

Title of Study: Comparative Effectiveness Research in Veterans with PTSD (CERV-PTSD)

Principal Investigator: \_\_\_\_\_ VA Facility: \_\_\_\_\_

Principal Investigator for Multisite Study: Paula P. Schnurr, PhD

|                                                             |                                                                  |               |
|-------------------------------------------------------------|------------------------------------------------------------------|---------------|
| _____<br>Participant's Name                                 | _____<br>Participant's Signature                                 | _____<br>Date |
| _____<br>Name of person obtaining authorization and consent | _____<br>Signature of person obtaining authorization and consent | _____<br>Date |

2921

SUBJECT'S IDENTIFICATION

VA Form **10-10-86**  
MAR 2006

VA CENTRAL IRB APPROVAL STAMP

*VA Central IRB Template October 5, 2011*

**Page 15 of 14**

2922  
2923  
  
2924  
  
2925  
2926  
  
2927  
  
2928  
2929  
2930  
  
2931  
  
2932  
  
2933  
  
2934  
  
2935  
  
2936  
  
2937  
  
2938  
  
2939  
  
2940  
  
2941  
  
2942  
  
2943  
  
2944  
2945  
2946  
2947  
2948  
  
2949

**Appendix B. BIOSTATISTICAL AND RESEARCH DATA PROCESSING (BRDP)**

**A. Data Management**

See **Section IX** of the protocol for a description of the procedures for data collection, management, and security for the study.

**B. Statistical Reports**

The figures and tables in this section are examples of the type of information that will be generated during the study for periodic evaluation by the Executive Committee and the Data Monitoring Committee. They are listed as follows:

- Figure B.1: Screened vs. Randomized by Hospital
- Figure B.2: Participant Intake Graph
- Table B.1: Recruitment by Hospital
- Table B.2: Balance on Major Subgroup Variables
- Table B.3: Randomizations over Time
- Table B.4: Number Failed Inclusion/Exclusion Criteria
- Table B.5: Baseline Characteristics
- Table B.6: Assessment Summaries at Baseline (and Follow-up)
- Table B.7: Psychotropic Medications at Baseline (and Follow-up)
- Table B.8: Termination from Study
- Table B.9: SAE from Study
- Table B.10: Number of Forms Received/Missing
- Table B.11: Number of Forms Received with Errors

Tables on participant accrual will be used to monitor the progress of participant enrollment into the study, overall and by participating hospital. Baseline characteristics will be compared by hospital to ensure the comparability of participants across hospital. Terminations, SAE and counts of data forms missing or with errors will also be compared by hospital. The data in the figures and tables will be supplied to the DMC by treatment group as well as overall.

**Figure B.1: Screened vs. Randomized by Hospital**  
(as of August 31st, 2016)

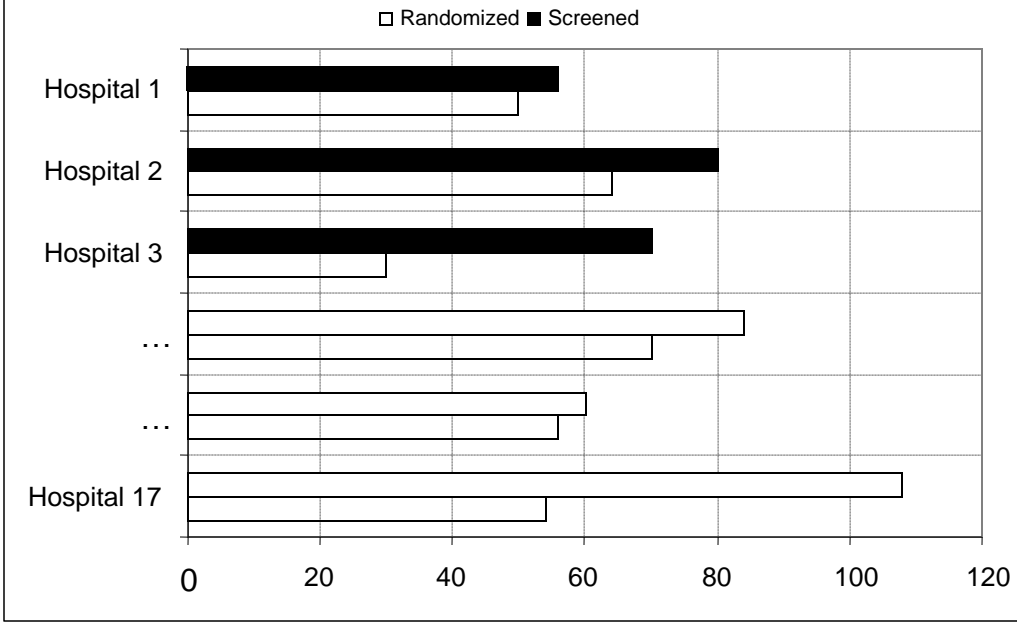

2950

2951

**Figure B.2: Participant Intake Graph**  
(as of August 31st, 2016)

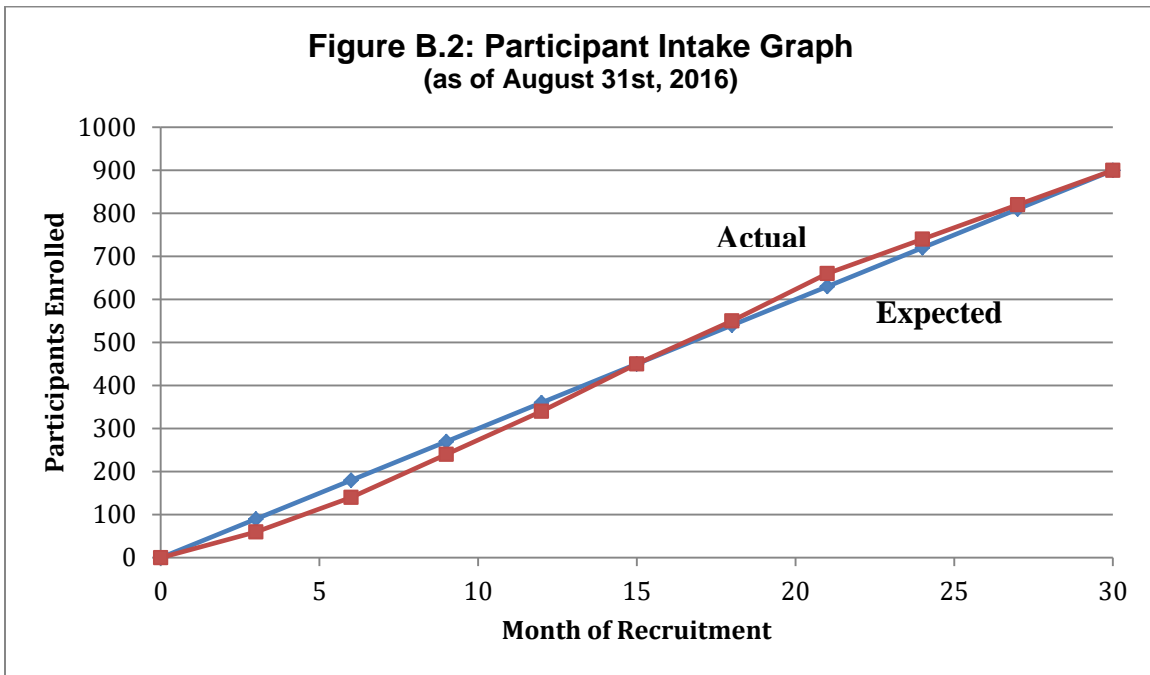

2952

2953

2954

2955

**Table B.1: Recruitment by Hospital**

|               | No. Screened | No. Randomized (%) |
|---------------|--------------|--------------------|
| Hospital:     |              |                    |
| - Hospital 1  |              |                    |
| - Hospital 2  |              |                    |
| - ...         |              |                    |
| - Hospital 17 |              |                    |
| Total         |              |                    |

2956

2957

2958

**Table B.2: Balance on Major Subgroup Variables**

|               | Treatment Group |             |       |
|---------------|-----------------|-------------|-------|
|               | Treatment A     | Treatment B | Total |
| Hospital      |                 |             |       |
| - Hospital 1  |                 |             |       |
| - Hospital 2  |                 |             |       |
| - ...         |                 |             |       |
| - Hospital 17 |                 |             |       |
| Gender        |                 |             |       |
| - Male        |                 |             |       |
| - Female      |                 |             |       |
| OEF/OIF/OND   |                 |             |       |
| - Y           |                 |             |       |
| - N           |                 |             |       |
| Race          |                 |             |       |
| - White       |                 |             |       |
| - Black       |                 |             |       |
| - Others      |                 |             |       |
| Total         |                 |             |       |

2959

2960

2961

**Table B.3: Randomizations over Time**

| Study Month | Hosp1 | Hosp2 | Hosp3 | .... | Hosp17 | Total |
|-------------|-------|-------|-------|------|--------|-------|
| 1           |       |       |       |      |        |       |
| 2           |       |       |       |      |        |       |
| 3.          |       |       |       |      |        |       |
| ...         |       |       |       |      |        |       |
| 30          |       |       |       |      |        |       |
| Total       |       |       |       |      |        |       |

2962

2963

2964

2965

**Table B.4: Number Failed Inclusion/Exclusion Criteria**

2966

|                                                                                                                                                                                                                                                                                                                                                                                                              | Hosp1 Hosp2 .... Hosp17<br>(N and %) | Total<br>N % |
|--------------------------------------------------------------------------------------------------------------------------------------------------------------------------------------------------------------------------------------------------------------------------------------------------------------------------------------------------------------------------------------------------------------|--------------------------------------|--------------|
| Number Screened                                                                                                                                                                                                                                                                                                                                                                                              |                                      |              |
| Failed Inclusion Criteria:<br><ul style="list-style-type: none"> <li>- Current conformed diagnosis of PTSD</li> <li>- One or more military trauma event</li> <li>- Agrees not to receive other psychotherapy for PTSD during study treatment</li> <li>- Stable psychoactive medication 30 days prior to entering the study</li> <li>- CAPS total score greater than or equal to 45</li> <li>- ...</li> </ul> |                                      |              |
| Failed Exclusion Criteria:<br><ul style="list-style-type: none"> <li>- Substance dependence not in remission for at least one month</li> <li>- Current psychotic symptoms</li> <li>- Current mania or manic phase of bipolar disorder</li> <li>- Significant current suicidal or homicidal ideation</li> <li>- Moderate to severe cognitive impairment</li> <li>- ...</li> </ul>                             |                                      |              |
| Did not sign consent form                                                                                                                                                                                                                                                                                                                                                                                    |                                      |              |
| Number Randomized                                                                                                                                                                                                                                                                                                                                                                                            |                                      |              |

2967

2968

2969

**Table B.5: Baseline Characteristics**

2970

| Characteristic                                                                                                                                                                                    | Hosp1 Hosp2 .... Hosp17<br>(N and %, or mean and SD) | Total<br>N % |
|---------------------------------------------------------------------------------------------------------------------------------------------------------------------------------------------------|------------------------------------------------------|--------------|
| Age                                                                                                                                                                                               |                                                      |              |
| Work Status<br><ul style="list-style-type: none"> <li>- Employed full-time</li> <li>- Employed part-time</li> <li>- ...</li> </ul>                                                                |                                                      |              |
| VA Service Disability<br><ul style="list-style-type: none"> <li>- Applied, but denied</li> <li>- Approved (nonzero%) <ul style="list-style-type: none"> <li>o Percentage</li> </ul> </li> </ul>   |                                                      |              |
| PTSD Service Disability<br><ul style="list-style-type: none"> <li>- Applied, but denied</li> <li>- Approved (nonzero%) <ul style="list-style-type: none"> <li>o Percentage</li> </ul> </li> </ul> |                                                      |              |
| Medical/Psychiatric History:                                                                                                                                                                      |                                                      |              |

2971

**Table B.6: Assessment Summaries at Baseline (and Follow-up)**

|                                                                                                                         | Hosp1 Hosp2 .... Hosp17<br>(mean and SD) | Overall<br>Mean SD |
|-------------------------------------------------------------------------------------------------------------------------|------------------------------------------|--------------------|
| Primary Assessments:<br>- CAPS<br>o Reexperiencing Symp.<br>o Avoidance Symp<br>o Numbing Symp.<br>o Hyperarousal Symp. |                                          |                    |
| Secondary Assessments:<br>- PDS<br>- BDI-II<br>- STAXI<br>- WHO-DAS-II<br>- WHOQOL-BREF<br>- ...                        |                                          |                    |

2972

2973

**Table B.7: Psychotropic Medications at Baseline (and Follow-up)**

| Medication | Hosp1 Hosp2 .... Hosp17<br>(N and %) | Total<br>N % |
|------------|--------------------------------------|--------------|
|            |                                      |              |
|            |                                      |              |
|            |                                      |              |
|            |                                      |              |
|            |                                      |              |
|            |                                      |              |
|            |                                      |              |
| ...        |                                      |              |
| Total      |                                      |              |

2974

2975

**Table B.8: Termination from Study**

|                                                                                                                                                                              | Hosp1 Hosp2 .... Hosp17 | Total |
|------------------------------------------------------------------------------------------------------------------------------------------------------------------------------|-------------------------|-------|
| Reason for Termination:<br>- Participant withdrew (related to treatment)<br>- Participant withdrew (unrelated to treatment)<br>- Moved away<br>- Lost to follow-up<br>- Died |                         |       |
| Withdrew HIPAA Authorization:<br>- Y<br>- N                                                                                                                                  |                         |       |
| Total                                                                                                                                                                        |                         |       |

2976



2977

**Table B.9: SAE from Study**

|                                                 | Hosp1 Hosp2 .... Hosp17<br>(N and %) | Total<br>N % |
|-------------------------------------------------|--------------------------------------|--------------|
| Adverse Event:<br>- Event1<br>- Event2<br>- ... |                                      |              |
| Total                                           |                                      |              |

2978

2979

**Table B.10: Number of Forms Received/Missing**

| Form  | Hosp1<br>rec'd missing | Hosp2<br>rec'd missing | .... | Total<br>rec'd missing |
|-------|------------------------|------------------------|------|------------------------|
| 01    |                        |                        |      |                        |
| 02    |                        |                        |      |                        |
| ...   |                        |                        |      |                        |
| xx    |                        |                        |      |                        |
| Total |                        |                        |      |                        |

2980

2981

**Table B.11: Number of Forms Received with Errors**

| Forms                         | Hosp1 Hosp2 .... Hosp17 | Total |
|-------------------------------|-------------------------|-------|
| Number submitted              |                         |       |
| Number with missing data      |                         |       |
| Number with data out of range |                         |       |
| Number randomized by mistake  |                         |       |
| Number of invalid codes       |                         |       |

2982

2983 **Appendix C. RESEARCH DATA FORMS**

2984 The sample forms that are used to collect the assessments in **Table VIII.1** are listed as follows:

- 2985 • Clinician-Administered PTSD Scale
- 2986 • Posttraumatic Diagnostic Scale
- 2987 • Patient Health Questionnaire-9
- 2988 • Spielberger State Anger Inventory
- 2989 • Brief Addiction Monitor (2 items)
- 2990 • Short Inventory of Problems-Revised
- 2991 • WHO-DAS-II
- 2992 • WHOQOL-BREF
- 2993 • Client Satisfaction Questionnaire
- 2994 • Treatment preference
- 2995 • Expectancy of Therapeutic Outcome
- 2996 • Service Utilization
- 2997 • Structured Clinical Interview for DSM-5
- 2998 • MoCA
- 2999 • Demographic information
- 3000 • VA TBI Screen
- 3001 • VA MST Screen
- 3002 • Life Events Checklist
- 3003 • PTSD Checklist
- 3004 • Beck Depression Inventory-II
- 3005 • Blinded Consult Request Form
- 3006

3007 **Appendix D. OWNERSHIP, CONTROL AND ACCESS TO STUDY DATA**

3008 **A. Ownership and Control**

3009 The CSP will retain all ownership rights to the study data, including original data and any  
3010 derived data generated from the original data. If the CSP study is being conducted with a  
3011 clinical research agreement with another institution, the terms of that agreement will define any  
3012 alternate conditions for ownership and control of study data. All study data will reside at the  
3013 CSPCC/ERIC or on its designated VA Research and Development servers and will not be  
3014 released until the objectives as stated in the protocol and the primary manuscript(s) identified in  
3015 the protocol publication plan have been completed. The CSPCC/ERIC will act as the repository  
3016 of all study data from a completed cooperative study.

3017 The study Executive Committee has the authority to determine all uses of the data, provided  
3018 that these uses do not conflict with the study protocol, CSP policies, VA policy or other  
3019 regulations. Potential uses include analyses of the data, publication of the results of analyses, or  
3020 distribution of copies of all or part of the study dataset.

3021 VA CSP is authorized to share the data for the purposes indicated under the Health Insurance  
3022 Portability and Accountability Act (HIPAA) Privacy Rule, 45 CFR 164.512(i) and authorities  
3023 stated in VHA Handbook 1200.12. Data may be released to other investigators after the  
3024 planned objectives and primary manuscript(s) are completed and upon approval of the Study  
3025 Chairman, Executive Committee (if it still exists), CSPCC/ERIC Director and Director, CSR&D  
3026 (see next section). Data use agreements, including assurance that all VA data security policies  
3027 will be strictly adhered to, will be instituted prior to any data being released.

3028 **B. Release and Sharing of Study Data Sets**

3029 While the CSP is the custodian of study data, the CSP does not seek to limit the use of the data,  
3030 but rather to ensure that these data sets are being appropriately used scientifically and ethically  
3031 and that the rights and welfare of study participants are protected. Local Site investigators  
3032 (LSIs) are encouraged to submit proposals to the Executive Committee for use of the data and  
3033 these will be approved if scientifically and ethically sound. Data sets will not be released before  
3034 the study database is locked and until the objectives as stated in the protocol and the primary  
3035 manuscript(s) have been completed.

3036 The Director, CSPCC/ERIC will have the authority to release data sets to Local Site  
3037 Investigators/Executive Committee members, who have been given approval for access to

3038 these data sets by the Executive Committee or by the Study Chairs if the Executive Committee  
3039 is no longer functioning. Investigators outside of the study, both VA and non-VA, must obtain  
3040 approval for release of data by the Executive Committee (if still functioning), the Director,  
3041 CSPCC/ERIC, and the Director, CSR&D. All recipients of CSP databases must sign a data use  
3042 agreement that stipulates that the recipient:

- 3043 • will only use the data for the purposes stated in the data use agreement,
- 3044 • will give proper credit to the study and the CSP and VA in all presentations and  
3045 publications,
- 3046 • will not give this data to other investigators without consent of the Directors,  
3047 CSPCC/ERIC and CSR&D,
- 3048 • will destroy or return the data when they have completed their work,
- 3049 • will not try to identify any study participant, and
- 3050 • will consider the data sets as confidential information and will keep the data sets in a  
3051 secure location.

3052  
3053 In addition, sharing of the data with another facility or institution will require evidence of approval  
3054 and any appropriate waivers by the IRB and/or Research Committee and Information Security  
3055 Officer of that institution. Sharing of CSP Study data outside of the CSP Study may be limited  
3056 by specifications in the language of the study informed consent or HIPAA privacy authorization  
3057 form.

3058 The CSPCC/ERIC, for its part, will provide the investigator requesting the data with de-identified  
3059 datasets or aggregate data, making identification of study participants as difficult as possible.  
3060 HIPAA guidelines for de-identified data sets will be used, whenever possible. Investigators will  
3061 not be provided with full study databases, but rather just with the information that they will need  
3062 to do their research. The CSPCC/ERIC's main responsibility is to prepare the needed analyses  
3063 for the primary manuscript(s) and secondary manuscripts identified in the protocol or planned by  
3064 the Executive Committee. Secondary analyses by the CSPCC/ERIC may be delayed until the  
3065 primary analyses and manuscripts are completed. Preparation of datasets and developing data  
3066 use agreements for sharing data will have a lower priority than the completion of study analyses  
3067 planned by the Executive Committee. Alternatively, the CSPCC/ERIC may provide the LSIs  
3068 with appropriate data sets if they have the resources to use these data sets.

3069

3070 **Appendix E. UPDATES TO THE PROTOCOL**

3071 On occasion, changes will be made to the study protocol. It is vital that these changes are  
 3072 reflected in your copy of the protocol. The following serves as a permanent record of all  
 3073 changes and additions (other than minor editorial changes) that have occurred since initial  
 3074 printing.

3075

| <b>Version number and date</b>        | <b>Section(s)</b> | <b>Page numbers in version where changes were implemented</b> | <b>Description</b>                                                                                                                                               |
|---------------------------------------|-------------------|---------------------------------------------------------------|------------------------------------------------------------------------------------------------------------------------------------------------------------------|
| Version 11.0.<br>February 16,<br>2018 | All               | All                                                           | Added new version number and version date to footer throughout the protocol.                                                                                     |
|                                       | VIII.G            | 51                                                            | The Fidelity Monitoring process has been updated.                                                                                                                |
| Version 10.0.<br>October 18,<br>2017  | All               | All                                                           | Added new version number and version date to footer throughout the protocol.                                                                                     |
|                                       | VII.C             | 36-37                                                         | Added a VFF Follow-up form.                                                                                                                                      |
|                                       | VIII.A.1          | 39                                                            | Table VIII.1 was updated to include the VFF Follow-up form.                                                                                                      |
|                                       | VIII.B.2          | 43                                                            | Language was added to clarify that therapy sessions can occur more or less frequently than once per week.                                                        |
|                                       | VIII.D            | 50                                                            | Language was added to allow for re-consent if a participant withdraws from the study (or is declared lost to follow-up).                                         |
|                                       | Appendix A        | All                                                           | Consent form template was updated to reflect the most current version.                                                                                           |
| Version 9.0.<br>August 1,<br>2017     | All               | All                                                           | Added new version number and version date to footer throughout the protocol.                                                                                     |
|                                       | IV.A              | 19                                                            | Added information regarding excluding patients who are currently incarcerated.                                                                                   |
|                                       | IV.C.3            | 26                                                            | Added language regarding the requirement to re-administer the CAPS if more than 30 days elapses between the Phase 3 appointment and the first treatment session. |

| <b>Version number and date</b>     | <b>Section(s)</b> | <b>Page numbers in version where changes were implemented</b> | <b>Description</b>                                                                                                                                                                                                                                                                          |
|------------------------------------|-------------------|---------------------------------------------------------------|---------------------------------------------------------------------------------------------------------------------------------------------------------------------------------------------------------------------------------------------------------------------------------------------|
|                                    | Appendix A        | All                                                           | Consent form template was updated to reflect the most current version                                                                                                                                                                                                                       |
| Version 8.0.<br>August 23,<br>2016 | All               | All                                                           | Added new version number and version date to footer throughout the protocol.                                                                                                                                                                                                                |
|                                    | X.C               | 59                                                            | Added language to clarify that the study may enroll (i.e. consent) up to 2550 participants in order to reach the randomization goal of 900 participants.                                                                                                                                    |
| Version 7.0,<br>May 23,<br>2016    | All               | All                                                           | Added new version number and version date to footer throughout the protocol.                                                                                                                                                                                                                |
|                                    | IV.B              | 19, 20                                                        | Added information about the Women's Enhanced Recruitment Process (WERP).                                                                                                                                                                                                                    |
|                                    | IV.B              | 21-23                                                         | Added the following sub-categories to the Recruitment section: "SC-initiated direct contacts to women Veterans who appear to be potentially eligible for the study", "SC-initiated direct contacts to all women patients at a facility", and "Women's Enhanced Recruitment Process (WERP)". |
|                                    | IV.C              | 23                                                            | Added language that will allow primary care providers to refer to the study. The sentence now reads "All participants, including self-referrals, will enter the study through referral by a mental health clinician or other qualified clinician at the participating site".                |
|                                    | VII.C             | 36-37                                                         | Added information about the Veteran Feedback Form (VFF).                                                                                                                                                                                                                                    |
|                                    | VIII.A.1          | 39                                                            | Added the Veteran Feedback Form to the Assessment Schedule (Table VIII.1).                                                                                                                                                                                                                  |
|                                    | IX.A              | 52, 53                                                        | Added information regarding the data management of the Veteran Feedback Form.                                                                                                                                                                                                               |

| <b>Version number and date</b> | <b>Section(s)</b> | <b>Page numbers in version where changes were implemented</b> | <b>Description</b>                                                                                                                                                                                                       |
|--------------------------------|-------------------|---------------------------------------------------------------|--------------------------------------------------------------------------------------------------------------------------------------------------------------------------------------------------------------------------|
|                                | XIII              | 73                                                            | Added language to indicate that the PBRN Coordinating Center team members will assist with monitoring recruitment and retention of women, and will conduct data entry of VFF data, and analyses of VFF findings.         |
| Version 6.0, October 23, 2015  | All               | All                                                           | Added new version number and version date to footer throughout the protocol.                                                                                                                                             |
|                                | VIII.A.4          | 38                                                            | Added language to allow on-site follow-up assessments to be completed via mail when a participant is unable to complete these assessments in-person (e.g., if the participant moved away after completion of treatment). |
|                                | XI.B,C, E         | 63, 66, 67                                                    | The language in this section was updated to reflect the current procedures for monitoring and reporting Adverse Events.                                                                                                  |
|                                | Appendix A        | All                                                           | Consent form template was updated to allow on-site follow-up assessments to be completed via mail when a participant is unable to complete these assessments in-person.                                                  |
|                                | Appendix B        | B.5                                                           | Table B.7 was edited to remove the names of medications (to prevent any confusion that this is meant to be a complete list of psychotropic medications that are monitored for the study).                                |
| Version 5.0, August 20, 2015   | All               | All                                                           | Added new version number and version date to footer throughout the protocol.                                                                                                                                             |
|                                | IV.A              | 19                                                            | The medication stabilization criteria was changed from 2 months prior to study entry to 30 days prior to study entry.                                                                                                    |
|                                | VIII.C            | 46                                                            | Changed the name of the PE Master Therapist from Peter Tuerk to Edna Foa.                                                                                                                                                |
|                                | Appendix A        | All                                                           | Consent form template was updated.                                                                                                                                                                                       |

| <b>Version number and date</b> | <b>Section(s)</b> | <b>Page numbers in version where changes were implemented</b> | <b>Description</b>                                                                                                                                                                                                                                                                                                                                                   |
|--------------------------------|-------------------|---------------------------------------------------------------|----------------------------------------------------------------------------------------------------------------------------------------------------------------------------------------------------------------------------------------------------------------------------------------------------------------------------------------------------------------------|
| Version 4.0, March 25, 2015    | All               | All                                                           | Added new version number and version date to footer throughout the protocol.                                                                                                                                                                                                                                                                                         |
|                                | I.E               | 12                                                            | Clarified that the exclusion is for psychotic symptoms or mania (including manic phase of bipolar disorder).                                                                                                                                                                                                                                                         |
|                                | III               | 17                                                            | The footnote for Table II.1 was updated to state that "Enrollment typically will take about 1 month".                                                                                                                                                                                                                                                                |
|                                | IV.A              | 19                                                            | Clarified that the exclusion is for psychotic symptoms or mania (including manic phase of bipolar disorder).                                                                                                                                                                                                                                                         |
|                                | VIII.B.5          | 43-44                                                         | Updated the language to indicate that the study Suicide Assessment Procedures should be followed if risk is indicated by the participant's responses to Item 1.9 of the PHQ-9 or by study therapist observations during the course of normal interactions with the participant. The previous language had incorrect guidance about what should be reported as an AE. |
|                                | Appendix A        | All                                                           | Consent form template was updated (the previous language suggested that bipolar disorder is an exclusion criterion, but that was never the intention)                                                                                                                                                                                                                |
| Version 3.0, February 11, 2015 | All               | All                                                           | Added new version number and version date to footer throughout the protocol.                                                                                                                                                                                                                                                                                         |
|                                | IV.A              | 19                                                            | The requirement to sign the VA Form 10 3203 (Consent for Use of Picture and/or Voice) has been removed. Per the new VHA Handbook 1200.05, study participants are no longer required to sign a separate audio consent form if the appropriate language is included in the study consent form.                                                                         |
|                                | V.A               | 25                                                            | Removed language about participants signing a VA Form 10 3203 to record therapy sessions for imaginal exposure homework exercises for PE.                                                                                                                                                                                                                            |



| Version number and date        | Section(s)    | Page numbers in version where changes were implemented | Description                                                                                                                                                                                                                                                                                                               |
|--------------------------------|---------------|--------------------------------------------------------|---------------------------------------------------------------------------------------------------------------------------------------------------------------------------------------------------------------------------------------------------------------------------------------------------------------------------|
|                                | X.B.3 and X.C | 54-55                                                  | Changed language to specify that we expect 900 participants to be <i>randomized</i> into the study, and around 64 participants to be <i>randomized</i> at each participating study site (the previous language was not in accordance with CIRB's definition of "enrolled", which includes screen failures after consent). |
|                                | Appendix A    | All                                                    | Consent form template was updated.                                                                                                                                                                                                                                                                                        |
| Version 2.0, October 24, 2014  | All           | All                                                    | Added new version number and version date to footer throughout the protocol.                                                                                                                                                                                                                                              |
|                                | IV.A          | 19                                                     | Added language to clarify that only psychoactive medication must be on a stable regimen for 2 months prior to study entry, and defined "stable regimen" to be no dose or medication change.                                                                                                                               |
|                                | VIII.A.2      | 37                                                     | Language referencing the specific Konexx USB Phone 2 PC program used to record telephone assessments has been deleted.                                                                                                                                                                                                    |
|                                | XI.C.1        | 64                                                     | The reporting period for AEs was corrected.                                                                                                                                                                                                                                                                               |
|                                | Appendix A    | All                                                    | Consent form template was updated.                                                                                                                                                                                                                                                                                        |
| Version 1.5, March 6, 2014     | All           | All                                                    | Added new version number and version date to footer throughout the protocol.                                                                                                                                                                                                                                              |
|                                | Appendix A    | All                                                    | Draft consent form template was updated.                                                                                                                                                                                                                                                                                  |
| Version 1.4, November 18, 2013 | All           | All                                                    | Added new version number and version date to footer throughout the protocol.                                                                                                                                                                                                                                              |
|                                | IV.A          | 19                                                     | Updated the inclusion criteria to include the completion of the VA Form 10-3203.                                                                                                                                                                                                                                          |
|                                | V.A           | 25                                                     | Included an explanation that participants will bring home recordings of their session per the usual manualized PE treatment protocol and that this is not behind the VA Firewall.                                                                                                                                         |

| <b>Version number and date</b> | <b>Section(s)</b> | <b>Page numbers in version where changes were implemented</b> | <b>Description</b>                                                                                                                                                                          |
|--------------------------------|-------------------|---------------------------------------------------------------|---------------------------------------------------------------------------------------------------------------------------------------------------------------------------------------------|
|                                | Appendix A        | All                                                           | Draft consent form template was updated.                                                                                                                                                    |
| Version 1.3, October 22, 2013  | All               | All                                                           | Added new version number and version date to footer throughout the protocol.                                                                                                                |
|                                | IV.A              | 19                                                            | Substance abuse was added to the inclusion criteria.                                                                                                                                        |
|                                | IV.C.1            | 22                                                            | Language was added to clarify that the SC will contact the potential participants initially by phone (up to 5 times) and then by mail with a letter.                                        |
|                                | IV.C.3            | 23                                                            | Language was added to clarify the procedures for contacting participants to provide them with the details of their treatment assignments and to schedule their initial therapy appointment. |
|                                | VIII.A.2          | 36                                                            | Language was added to clarify that the independent assessors are members of the research team and are VA or WOC employees.                                                                  |
|                                | VIII.A.6          | 39                                                            | Added language to indicate that participants will be reimbursed for travel over 50 miles.                                                                                                   |
|                                | VIII.F            | 47                                                            | “Supervisors” was changed to “Therapy Supervisors” and language was added to clarify their position and duties.                                                                             |
|                                | VIII.G            | 48                                                            | Information was added about digital recordings.                                                                                                                                             |
|                                | IX.B              | 51                                                            | Update was made to reflect that records will be maintained and destroyed per the VHA Records Control Schedule (RCS-10-1).                                                                   |
|                                | XI.B              | 63                                                            | The publication date of Handbook 1058.01 was updated to the most current version date of November 2011.                                                                                     |
|                                | XI.E              | 67                                                            | Added language that CIRB procedures and VHA Handbook 1058.01 will be followed for reporting AEs.                                                                                            |
|                                | XII.D.1           | 69                                                            | Language was added to indicate that CIRB will be informed of all site terminations and probations.                                                                                          |

| <b>Version number and date</b> | <b>Section(s)</b> | <b>Page numbers in version where changes were implemented</b> | <b>Description</b>                                                                                                                                                                                          |
|--------------------------------|-------------------|---------------------------------------------------------------|-------------------------------------------------------------------------------------------------------------------------------------------------------------------------------------------------------------|
|                                | XII.D.2           | 69                                                            | Updates were made to indicate that CIRB will be the IRB of record for all study sites and that protocol violations must be reported to CIRB.                                                                |
|                                | XIII              | 70                                                            | Mention of the Human Studies Subcommittee was removed and replaced with Central IRB.                                                                                                                        |
|                                | Appendix A        | All                                                           | Draft consent form template was updated.                                                                                                                                                                    |
|                                | Appendix C        | C-1                                                           | Blinded Consult Request Form was added to the list of Research Data Forms.                                                                                                                                  |
| Version 1.2, October 9, 2013   | All               | All                                                           | Added new version number and version date to footer throughout the protocol.                                                                                                                                |
|                                | Appendix A        | All                                                           | Draft consent form template was updated.                                                                                                                                                                    |
| Version 1.1, September 4, 2013 | All               | All                                                           | Added study number, version number, and version date to footer throughout the protocol.                                                                                                                     |
|                                | IV.B              | 19-21                                                         | More details about study recruitment were added.                                                                                                                                                            |
|                                | IV.C              | 21 - 23                                                       | More details about screening and consent were added                                                                                                                                                         |
|                                | VII.C             | 33-34                                                         | Language was updated to reflect the rollouts current usage of PHQ-9 to monitor depression symptoms in PE and CPT (rather than BDI-II).                                                                      |
|                                | VIII.A.1          | 35-36                                                         | Table VIII.1 (Assessment Schedule) was updated, switching the BDI-II and PHQ-9 measures as a result of the change in the rollout practice.                                                                  |
|                                | VIII.A.2          | 36-37                                                         | More details were added about the telephone assessment                                                                                                                                                      |
|                                | VIII.A.6          | 39                                                            | Justification for the payment schedule was added.                                                                                                                                                           |
|                                | VIII.B.3          | 42                                                            | Language was added to indicate that if participants do not complete treatment within 20 weeks, they will be offered 1-2 additional sessions, including the termination session of their assigned treatment. |

| <b>Version number and date</b> | <b>Section(s)</b> | <b>Page numbers in version where changes were implemented</b> | <b>Description</b>                                                                                                                     |
|--------------------------------|-------------------|---------------------------------------------------------------|----------------------------------------------------------------------------------------------------------------------------------------|
|                                | IX.A              | 49                                                            | Updates were made regarding the data forms.                                                                                            |
|                                | X.D.3             | 59                                                            | Table X.3 (Secondary Outcomes) was updated, switching the BDI-II and PHQ-9 measures as a result of the change in the rollout practice. |
|                                | Appendix A        | All                                                           | Draft consent form template was updated.                                                                                               |
|                                | Appendix E        | All                                                           | Added Appendix E to track updates to the protocol.                                                                                     |
| Version 1.0, June 12, 2013     | NA                | NA                                                            | Approved by CSP Central Office on 8/27/2013                                                                                            |

3076
